# Supplementary material for: Characterisation of a Staphylococcus aureus Isolate Carrying Phage-Borne Enterotoxin E from a European Badger (Meles meles)
Source: MDPI journal article supplement (doi:10.3390/pathogens12050704), 2023-05-12
Supplement: s1 [file s1]

| STRAIN / ISOLATE                        | ACCESSION NUMBER              | SPECIES MARKER       |                                                   |            |           |                                     |                          |                     | STAPHYLOXANTHIN BIOSYNTHESIS OPERON |           |                           |                                 |                               | REGULATORY GENES                     |                                     |                |
|-----------------------------------------|-------------------------------|----------------------|---------------------------------------------------|------------|-----------|-------------------------------------|--------------------------|---------------------|-------------------------------------|-----------|---------------------------|---------------------------------|-------------------------------|--------------------------------------|-------------------------------------|----------------|
|                                         |                               | rrnD1                | gapA                                              | katA       | CoA       | nuc1                                | spa                      | sbi                 | crtM                                |           | crtN                      | crtO                            | crtP                          | sarA                                 | saeS                                | vraS           |
|                                         |                               |                      |                                                   |            |           |                                     |                          |                     | crtM-nonST93                        | crtM-ST93 |                           |                                 |                               |                                      |                                     |                |
|                                         |                               | Domain 1 of 23S-rRNA | glyceraldehyde 3-phosphate dehydrogenase, locus 1 | katalase A | coagulase | thermostable extracellular nuclease | staphylococcal protein A | IgG-binding protein | dehydroqualene synthase             |           | dehydroqualene desaturase | staphyloxanthin acyltransferase | diagono-neuro-sporene oxidase | staphylococcal accessory regulator A | histidine protein kinase, sae locus | sensor protein |
| V40-124624                              | [pending]                     | POS                  | POS                                               | POS        | POS       | POS                                 | POS                      | POS                 | POS                                 | NEG       | POS                       | POS                             | POS                           | POS                                  | POS                                 | POS            |
| V40-124624: in silico prediction        | [pending]                     | POS                  | POS                                               | POS        | POS       | POS                                 | POS                      | POS                 | POS                                 | NEG       | POS                       | POS                             | POS                           | POS                                  | POS                                 | POS            |
| SA-120: in silico prediction            | GenBank JXIG/SAMN03219992     | POS                  | POS                                               | POS        | POS       | POS                                 | POS                      | POS                 | POS                                 | NEG       | POS                       | POS                             | POS                           | POS                                  | POS                                 | POS            |
| 61908: in silico prediction             | GenBank FJNO/SAMEA2298602     | POS                  | POS                                               | POS        | POS       | POS                                 | POS                      | POS                 | POS                                 | NEG       | POS                       | POS                             | POS                           | POS                                  | POS                                 | POS            |
| M1790_98_1: in silico prediction        | GenBank FJNU/SAMEA1929516     | POS                  | POS                                               | POS        | POS       | POS                                 | POS                      | POS                 | POS                                 | NEG       | POS                       | POS                             | POS                           | POS                                  | POS                                 | POS            |
| GKP138-13: in silico prediction         | GenBank FMRL/SAMEA1708807     | POS                  | POS                                               | POS        | POS       | POS                                 | POS                      | POS                 | POS                                 | NEG       | POS                       | POS                             | POS                           | POS                                  | POS                                 | POS            |
| GKP138-2: in silico prediction          | GenBank FMRM/SAMEA1708977     | POS                  | POS                                               | POS        | POS       | POS                                 | POS                      | POS                 | POS                                 | NEG       | POS                       | POS                             | POS                           | POS                                  | POS                                 | POS            |
| GKP138-31: in silico prediction         | GenBank FMRR/SAMEA1708981     | POS                  | POS                                               | POS        | POS       | POS                                 | POS                      | POS                 | POS                                 | NEG       | POS                       | POS                             | POS                           | POS                                  | POS                                 | POS            |
| GKP138-33: in silico prediction         | GenBank FMRO/SAMEA1708977     | POS                  | POS                                               | POS        | POS       | POS                                 | POS                      | POS                 | POS                                 | NEG       | POS                       | POS                             | POS                           | POS                                  | POS                                 | POS            |
| GKP138-52: in silico prediction         | GenBank FMRR/SAMEA1708955     | POS                  | POS                                               | POS        | POS       | POS                                 | POS                      | POS                 | POS                                 | NEG       | POS                       | POS                             | POS                           | POS                                  | POS                                 | POS            |
| GKP138-78: in silico prediction         | GenBank FMRR/SAMEA1708688     | POS                  | POS                                               | POS        | POS       | POS                                 | POS                      | POS                 | POS                                 | NEG       | POS                       | POS                             | POS                           | POS                                  | POS                                 | POS            |
| GKP136-4: in silico prediction          | GenBank FMRR/SAMEA1708785     | POS                  | POS                                               | POS        | POS       | POS                                 | POS                      | POS                 | POS                                 | NEG       | POS                       | POS                             | POS                           | POS                                  | POS                                 | POS            |
| ZTA09_03668_9_HSA: in silico prediction | SAMEA2298561                  | POS                  | POS                                               | POS        | POS       | POS                                 | POS                      | POS                 | POS                                 | NEG       | POS                       | POS                             | POS                           | POS                                  | POS                                 | POS            |
| GKP136-58: in silico prediction         | GenBank FMRI/SAMEA1708766     | POS                  | POS                                               | POS        | POS       | POS                                 | POS                      | POS                 | POS                                 | NEG       | POS                       | POS                             | POS                           | POS                                  | POS                                 | POS            |
| 004_0004_23k: in silico prediction      | SAMEA2298547                  | POS                  | POS                                               | POS        | POS       | POS                                 | POS                      | POS                 | POS                                 | NEG       | POS                       | POS                             | POS                           | POS                                  | POS                                 | POS            |
| BA06_02038: in silico prediction        | SAMEA2298548                  | POS                  | POS                                               | POS        | POS       | POS                                 | POS                      | POS                 | POS                                 | NEG       | POS                       | POS                             | POS                           | POS                                  | POS                                 | POS            |
| GKP138-4: in silico prediction          | GenBank FMRR/SAMEA1708883     | POS                  | POS                                               | POS        | POS       | POS                                 | POS                      | POS                 | POS                                 | NEG       | POS                       | POS                             | POS                           | POS                                  | POS                                 | POS            |
| ZTA10_02421_9_HSA: in silico prediction | SAMEA2298571                  | POS                  | POS                                               | POS        | POS       | POS                                 | POS                      | POS                 | POS                                 | NEG       | POS                       | POS                             | POS                           | POS                                  | POS                                 | POS            |
| GKP136-62: in silico prediction         | GenBank FMSC/SAMEA1708769     | POS                  | POS                                               | POS        | POS       | POS                                 | POS                      | POS                 | POS                                 | NEG       | POS                       | POS                             | POS                           | POS                                  | POS                                 | POS            |
| LGA251: in silico prediction            | GenBank FR821779/SAMEA2272771 | POS                  | POS                                               | POS        | POS       | POS                                 | POS                      | POS                 | POS                                 | NEG       | POS                       | POS                             | POS                           | POS                                  | POS                                 | POS            |
| UK_NCTC13552: in silico prediction      | GenBank LR134084/SAMEA3491693 | POS                  | POS                                               | POS        | POS       | POS                                 | POS                      | POS                 | POS                                 | NEG       | POS                       | POS                             | POS                           | POS                                  | POS                                 | POS            |
| GKP138-71: in silico prediction         | GenBank FMPP/SAMEA1708930     | POS                  | POS                                               | POS        | POS       | POS                                 | POS                      | POS                 | POS                                 | NEG       | POS                       | POS                             | POS                           | POS                                  | POS                                 | POS            |
| cat-mandible-2013: in silico prediction | GenBank LUIFG/SAMN04537353    | POS                  | POS                                               | POS        | POS       | POS                                 | POS                      | POS                 | POS                                 | NEG       | POS                       | POS                             | POS                           | POS                                  | POS                                 | POS            |
| 10_7350_D: in silico prediction         | SAMEA1033305                  | POS                  | POS                                               | POS        | POS       | POS                                 | POS                      | POS                 | POS                                 | NEG       | POS                       | POS                             | POS                           | POS                                  | POS                                 | POS            |
| H114440275_A: in silico prediction      | SAMEA1904132                  | POS                  | POS                                               | POS        | POS       | POS                                 | POS                      | POS                 | POS                                 | NEG       | POS                       | POS                             | POS                           | POS                                  | POS                                 | POS            |

[illegible]

[illegible]

[illegible]

| STRAIN / ISOLATE                                                                                                                        | METHICILLIN RESISTANCE AND SCCmec TYPING                                            |                                                                                     |                                                                                                                                                                                       |                  |                                                                                                                        |                                                                 |                                                       |                                                     |                                                                              |                                                                   |                                                                |                                                                                          |                                                                                                                                             |                                                                                                                                             |                                                                                     |      |
|-----------------------------------------------------------------------------------------------------------------------------------------|-------------------------------------------------------------------------------------|-------------------------------------------------------------------------------------|---------------------------------------------------------------------------------------------------------------------------------------------------------------------------------------|------------------|------------------------------------------------------------------------------------------------------------------------|-----------------------------------------------------------------|-------------------------------------------------------|-----------------------------------------------------|------------------------------------------------------------------------------|-------------------------------------------------------------------|----------------------------------------------------------------|------------------------------------------------------------------------------------------|---------------------------------------------------------------------------------------------------------------------------------------------|---------------------------------------------------------------------------------------------------------------------------------------------|-------------------------------------------------------------------------------------|------|
|                                                                                                                                         | B2Y834                                                                              | B6VQU0                                                                              | Q3YK51                                                                                                                                                                                | ydhK             | C1PH94                                                                                                                 | DUF1958                                                         | Q4LAG7                                                |                                                     | C5QAP8<br>(SCCmec XI)                                                        | Q8CU82                                                            | D3JD07                                                         | cas1                                                                                     |                                                                                                                                             | fusC<br>(Q6GD50)                                                                                                                            | tirS                                                                                | yeeA |
|                                                                                                                                         |                                                                                     |                                                                                     |                                                                                                                                                                                       |                  |                                                                                                                        |                                                                 | Q4LAG7<br>(SCCmecV,<br>SO385)                         | Q4LAG7<br>(SCCfus<br>45394F/MSSA<br>476)            |                                                                              |                                                                   |                                                                | cas1<br>(MSHR1132)                                                                       | cas1 (M06-<br>171)                                                                                                                          |                                                                                                                                             |                                                                                     |      |
|                                                                                                                                         |                                                                                     |                                                                                     |                                                                                                                                                                                       |                  |                                                                                                                        |                                                                 |                                                       |                                                     |                                                                              |                                                                   |                                                                |                                                                                          |                                                                                                                                             |                                                                                                                                             |                                                                                     |      |
| Abortive phage<br>resistance protein.<br>Subtyping SCCmec<br>IV, i.e., identification<br>of SCCmec IV A, G, c<br>and SCCmec<br>MRS42H47 | Putative protein.<br>Subtyping SCCmec<br>IV, i.e., identification<br>of SCCmec IVh) | Putative protein.<br>Subtyping SCCmec<br>IV, i.e., identification<br>of SCCmec IV g | Putative lipoprotein.<br>Present in some<br>composite elements<br>comprising SCCmec<br>and heavy metal<br>resistance genes<br>including the one in<br>PRR3757, Genbank:<br>CP000255.1 | Putative protein | Subtyping SCCmec<br>VI. Present, e.g., in<br>PM1, Genbank<br>BAFA but absent,<br>e.g., in Strain 3957,<br>Genbank AOFU | Putative protein<br>located within<br>SCCmec type V<br>elements | Putative protein<br>located within<br>SCCfus elements | Putative protein.<br>Identification of<br>SCCmec XI | Putative protein.<br>Present in some<br>SCCmec/fus<br>composite<br>elements. | Putative protein.<br>Present in some<br>composite SCC<br>elements | CRISPR-associated<br>endonuclease 1.<br>Present in<br>MSHR1132 | CRISPR-associated<br>endonuclease 1.<br>Present in<br>M06/O171,<br>Genbank<br>HE980450.1 | SCC-associated<br>fusidic acid<br>resistance gene.<br>Present in "SCCfus"<br>elements or<br>together with mecA<br>in composite<br>elements. | Staphylococcal TIR-<br>protein binding<br>protein. Subtyping<br>SCCfus because it is<br>frequently, but not<br>always,<br>accompanying fusC | Putative DNA<br>methyltransferase.<br>Subtyping<br>SCCmec/fus<br>composite elements |      |
| V40-124624                                                                                                                              | NEG                                                                                 | NEG                                                                                 | NEG                                                                                                                                                                                   | NEG              | NEG                                                                                                                    | NEG                                                             | NEG                                                   | NEG                                                 | NEG                                                                          | NEG                                                               | NEG                                                            | NEG                                                                                      | NEG                                                                                                                                         | NEG                                                                                                                                         | NEG                                                                                 | NEG  |
| V40-124624: in silico prediction                                                                                                        | NEG                                                                                 | NEG                                                                                 | NEG                                                                                                                                                                                   | NEG              | NEG                                                                                                                    | NEG                                                             | NEG                                                   | NEG                                                 | NEG                                                                          | NEG                                                               | NEG                                                            | NEG                                                                                      | NEG                                                                                                                                         | NEG                                                                                                                                         | NEG                                                                                 | NEG  |
| SA-120: in silico prediction                                                                                                            | NEG                                                                                 | NEG                                                                                 | NEG                                                                                                                                                                                   | NEG              | NEG                                                                                                                    | NEG                                                             | NEG                                                   | NEG                                                 | NEG                                                                          | NEG                                                               | NEG                                                            | NEG                                                                                      | NEG                                                                                                                                         | NEG                                                                                                                                         | NEG                                                                                 | NEG  |
| 61908: in silico prediction                                                                                                             | NEG                                                                                 | NEG                                                                                 | NEG                                                                                                                                                                                   | NEG              | NEG                                                                                                                    | NEG                                                             | NEG                                                   | NEG                                                 | NEG                                                                          | NEG                                                               | NEG                                                            | NEG                                                                                      | NEG                                                                                                                                         | NEG                                                                                                                                         | NEG                                                                                 | NEG  |
| M1790_98_1: in silico prediction                                                                                                        | NEG                                                                                 | NEG                                                                                 | NEG                                                                                                                                                                                   | NEG              | NEG                                                                                                                    | NEG                                                             | NEG                                                   | NEG                                                 | NEG                                                                          | NEG                                                               | NEG                                                            | NEG                                                                                      | NEG                                                                                                                                         | NEG                                                                                                                                         | NEG                                                                                 | NEG  |
| GKP138-13: in silico prediction                                                                                                         | NEG                                                                                 | NEG                                                                                 | NEG                                                                                                                                                                                   | NEG              | NEG                                                                                                                    | NEG                                                             | NEG                                                   | NEG                                                 | NEG                                                                          | NEG                                                               | NEG                                                            | NEG                                                                                      | NEG                                                                                                                                         | NEG                                                                                                                                         | NEG                                                                                 | NEG  |
| GKP138-2: in silico prediction                                                                                                          | NEG                                                                                 | NEG                                                                                 | NEG                                                                                                                                                                                   | NEG              | NEG                                                                                                                    | NEG                                                             | NEG                                                   | NEG                                                 | NEG                                                                          | NEG                                                               | NEG                                                            | NEG                                                                                      | NEG                                                                                                                                         | NEG                                                                                                                                         | NEG                                                                                 | NEG  |
| GKP138-31: in silico prediction                                                                                                         | NEG                                                                                 | NEG                                                                                 | NEG                                                                                                                                                                                   | NEG              | NEG                                                                                                                    | NEG                                                             | NEG                                                   | NEG                                                 | NEG                                                                          | NEG                                                               | NEG                                                            | NEG                                                                                      | NEG                                                                                                                                         | NEG                                                                                                                                         | NEG                                                                                 | NEG  |
| GKP138-33: in silico prediction                                                                                                         | NEG                                                                                 | NEG                                                                                 | NEG                                                                                                                                                                                   | NEG              | NEG                                                                                                                    | NEG                                                             | NEG                                                   | NEG                                                 | NEG                                                                          | NEG                                                               | NEG                                                            | NEG                                                                                      | NEG                                                                                                                                         | NEG                                                                                                                                         | NEG                                                                                 | NEG  |
| GKP138-52: in silico prediction                                                                                                         | NEG                                                                                 | NEG                                                                                 | NEG                                                                                                                                                                                   | NEG              | NEG                                                                                                                    | NEG                                                             | NEG                                                   | NEG                                                 | NEG                                                                          | NEG                                                               | NEG                                                            | NEG                                                                                      | NEG                                                                                                                                         | NEG                                                                                                                                         | NEG                                                                                 | NEG  |
| GKP138-78: in silico prediction                                                                                                         | NEG                                                                                 | NEG                                                                                 | NEG                                                                                                                                                                                   | NEG              | NEG                                                                                                                    | NEG                                                             | NEG                                                   | NEG                                                 | NEG                                                                          | NEG                                                               | NEG                                                            | NEG                                                                                      | NEG                                                                                                                                         | NEG                                                                                                                                         | NEG                                                                                 | NEG  |
| GKP136-4: in silico prediction                                                                                                          | NEG                                                                                 | NEG                                                                                 | NEG                                                                                                                                                                                   | NEG              | NEG                                                                                                                    | NEG                                                             | NEG                                                   | NEG                                                 | NEG                                                                          | NEG                                                               | NEG                                                            | NEG                                                                                      | NEG                                                                                                                                         | NEG                                                                                                                                         | NEG                                                                                 | NEG  |
| ZTA09_03668_9_HSA: in silico prediction                                                                                                 | NEG                                                                                 | NEG                                                                                 | NEG                                                                                                                                                                                   | NEG              | NEG                                                                                                                    | NEG                                                             | NEG                                                   | NEG                                                 | NEG                                                                          | NEG                                                               | NEG                                                            | NEG                                                                                      | NEG                                                                                                                                         | NEG                                                                                                                                         | NEG                                                                                 | NEG  |
| GKP136-58: in silico prediction                                                                                                         | NEG                                                                                 | NEG                                                                                 | NEG                                                                                                                                                                                   | NEG              | NEG                                                                                                                    | NEG                                                             | NEG                                                   | NEG                                                 | NEG                                                                          | NEG                                                               | NEG                                                            | NEG                                                                                      | NEG                                                                                                                                         | NEG                                                                                                                                         | NEG                                                                                 | NEG  |
| 004_0004_23k: in silico prediction                                                                                                      | NEG                                                                                 | NEG                                                                                 | NEG                                                                                                                                                                                   | NEG              | NEG                                                                                                                    | NEG                                                             | NEG                                                   | NEG                                                 | NEG                                                                          | NEG                                                               | NEG                                                            | NEG                                                                                      | NEG                                                                                                                                         | NEG                                                                                                                                         | NEG                                                                                 | NEG  |
| BA06_02038: in silico prediction                                                                                                        | NEG                                                                                 | NEG                                                                                 | NEG                                                                                                                                                                                   | NEG              | NEG                                                                                                                    | NEG                                                             | NEG                                                   | NEG                                                 | NEG                                                                          | NEG                                                               | NEG                                                            | NEG                                                                                      | NEG                                                                                                                                         | NEG                                                                                                                                         | NEG                                                                                 | NEG  |
| GKP138-4: in silico prediction                                                                                                          | NEG                                                                                 | NEG                                                                                 | NEG                                                                                                                                                                                   | NEG              | NEG                                                                                                                    | NEG                                                             | NEG                                                   | NEG                                                 | NEG                                                                          | NEG                                                               | NEG                                                            | NEG                                                                                      | NEG                                                                                                                                         | NEG                                                                                                                                         | NEG                                                                                 | NEG  |
| ZTA10_02421_9_HSA: in silico prediction                                                                                                 | NEG                                                                                 | NEG                                                                                 | NEG                                                                                                                                                                                   | NEG              | NEG                                                                                                                    | NEG                                                             | NEG                                                   | NEG                                                 | NEG                                                                          | NEG                                                               | NEG                                                            | NEG                                                                                      | NEG                                                                                                                                         | NEG                                                                                                                                         | NEG                                                                                 | NEG  |
| GKP136-62: in silico prediction                                                                                                         | NEG                                                                                 | NEG                                                                                 | NEG                                                                                                                                                                                   | NEG              | NEG                                                                                                                    | NEG                                                             | NEG                                                   | NEG                                                 | NEG                                                                          | NEG                                                               | NEG                                                            | NEG                                                                                      | NEG                                                                                                                                         | NEG                                                                                                                                         | NEG                                                                                 | NEG  |
| LGA251: in silico prediction                                                                                                            | NEG                                                                                 | NEG                                                                                 | NEG                                                                                                                                                                                   | NEG              | NEG                                                                                                                    | NEG                                                             | NEG                                                   | NEG                                                 | NEG                                                                          | POS                                                               | NEG                                                            | NEG                                                                                      | NEG                                                                                                                                         | NEG                                                                                                                                         | NEG                                                                                 | NEG  |
| UK_NCTC13552: in silico prediction                                                                                                      | NEG                                                                                 | NEG                                                                                 | NEG                                                                                                                                                                                   | NEG              | NEG                                                                                                                    | NEG                                                             | NEG                                                   | NEG                                                 | NEG                                                                          | POS                                                               | NEG                                                            | NEG                                                                                      | NEG                                                                                                                                         | NEG                                                                                                                                         | NEG                                                                                 | NEG  |
| GKP138-71: in silico prediction                                                                                                         | NEG                                                                                 | NEG                                                                                 | NEG                                                                                                                                                                                   | NEG              | NEG                                                                                                                    | NEG                                                             | NEG                                                   | NEG                                                 | NEG                                                                          | POS                                                               | NEG                                                            | NEG                                                                                      | NEG                                                                                                                                         | NEG                                                                                                                                         | NEG                                                                                 | NEG  |
| cat-mandible-2013: in silico prediction                                                                                                 | NEG                                                                                 | NEG                                                                                 | NEG                                                                                                                                                                                   | NEG              | NEG                                                                                                                    | NEG                                                             | NEG                                                   | NEG                                                 | NEG                                                                          | NEG                                                               | NEG                                                            | NEG                                                                                      | NEG                                                                                                                                         | NEG                                                                                                                                         | NEG                                                                                 | NEG  |
| 10_7350_D: in silico prediction                                                                                                         | NEG                                                                                 | NEG                                                                                 | NEG                                                                                                                                                                                   | NEG              | NEG                                                                                                                    | NEG                                                             | NEG                                                   | NEG                                                 | NEG                                                                          | POS                                                               | NEG                                                            | NEG                                                                                      | NEG                                                                                                                                         | NEG                                                                                                                                         | NEG                                                                                 | NEG  |
| H114440275_A: in silico prediction                                                                                                      | NEG                                                                                 | NEG                                                                                 | NEG                                                                                                                                                                                   | NEG              | NEG                                                                                                                    | NEG                                                             | NEG                                                   | NEG                                                 | NEG                                                                          | POS                                                               | NEG                                                            | NEG                                                                                      | NEG                                                                                                                                         | NEG                                                                                                                                         | NEG                                                                                 | NEG  |

| STRAIN / ISOLATE                        | METHICILLIN RESISTANCE AND SCCmec TYPING |                                |                  |                               |       |       |      |      |                                           |                                           |                                           |                                           |                                           |                                           |                                      |                                   |                                           |                                           |
|-----------------------------------------|------------------------------------------|--------------------------------|------------------|-------------------------------|-------|-------|------|------|-------------------------------------------|-------------------------------------------|-------------------------------------------|-------------------------------------------|-------------------------------------------|-------------------------------------------|--------------------------------------|-----------------------------------|-------------------------------------------|-------------------------------------------|
|                                         | ACME                                     |                                |                  |                               | opp3B | opp3C | adhC | speG | ccrA/B-01                                 |                                           | ccrA/B-02                                 |                                           | ccrA/B-03                                 |                                           | ccrAA/C                              |                                   | ccrA/B-04                                 |                                           |
|                                         | arcA-SCC                                 | arcB-SCC                       | arcC-SCC         | arcD-SCC                      |       |       |      |      | ccrA-1                                    | ccrB-1                                    | ccrA-2                                    | ccrB-2                                    | ccrA-3                                    | ccrB-3                                    | ccrAA                                | ccrC (85-2082)                    | ccrA-4                                    | ccrB-4                                    |
|                                         | Arginine deiminase                       | Ornithine carbamoyltransferase | Carbamate kinase | Arginine/ornithine antiporter |       |       |      |      | Cassette chromosome recombinase A, type 1 | Cassette chromosome recombinase B, type 1 | Cassette chromosome recombinase A, type 2 | Cassette chromosome recombinase B, type 2 | Cassette chromosome recombinase A, type 3 | Cassette chromosome recombinase B, type 3 | hypoth. Protein associated with ccrC | Cassette chromosome recombinase C | Cassette chromosome recombinase A, type 4 | Cassette chromosome recombinase B, type 4 |
| V40-124624                              | NEG                                      | NEG                            | NEG              | NEG                           | NEG   | NEG   | NEG  | NEG  | NEG                                       | NEG                                       | NEG                                       | NEG                                       | NEG                                       | NEG                                       | NEG                                  | NEG                               | NEG                                       | NEG                                       |
| V40-124624: in silico prediction        | NEG                                      | NEG                            | NEG              | NEG                           | NEG   | NEG   | NEG  | NEG  | NEG                                       | NEG                                       | NEG                                       | NEG                                       | NEG                                       | NEG                                       | NEG                                  | NEG                               | NEG                                       | NEG                                       |
| SA-120: in silico prediction            | NEG                                      | NEG                            | NEG              | NEG                           | NEG   | NEG   | NEG  | NEG  | NEG                                       | NEG                                       | NEG                                       | NEG                                       | NEG                                       | NEG                                       | NEG                                  | NEG                               | NEG                                       | NEG                                       |
| 61908: in silico prediction             | NEG                                      | NEG                            | NEG              | NEG                           | NEG   | NEG   | NEG  | NEG  | NEG                                       | NEG                                       | NEG                                       | NEG                                       | NEG                                       | NEG                                       | NEG                                  | NEG                               | NEG                                       | NEG                                       |
| M1790_98_1: in silico prediction        | NEG                                      | NEG                            | NEG              | NEG                           | NEG   | NEG   | NEG  | NEG  | NEG                                       | NEG                                       | NEG                                       | NEG                                       | NEG                                       | NEG                                       | NEG                                  | NEG                               | NEG                                       | NEG                                       |
| GKP138-13: in silico prediction         | NEG                                      | NEG                            | NEG              | NEG                           | NEG   | NEG   | NEG  | NEG  | NEG                                       | NEG                                       | NEG                                       | NEG                                       | NEG                                       | NEG                                       | NEG                                  | NEG                               | NEG                                       | NEG                                       |
| GKP138-2: in silico prediction          | NEG                                      | NEG                            | NEG              | NEG                           | NEG   | NEG   | NEG  | NEG  | NEG                                       | NEG                                       | NEG                                       | NEG                                       | NEG                                       | NEG                                       | NEG                                  | NEG                               | NEG                                       | NEG                                       |
| GKP138-31: in silico prediction         | NEG                                      | NEG                            | NEG              | NEG                           | NEG   | NEG   | NEG  | NEG  | NEG                                       | NEG                                       | NEG                                       | NEG                                       | NEG                                       | NEG                                       | NEG                                  | NEG                               | NEG                                       | NEG                                       |
| GKP138-33: in silico prediction         | NEG                                      | NEG                            | NEG              | NEG                           | NEG   | NEG   | NEG  | NEG  | NEG                                       | NEG                                       | NEG                                       | NEG                                       | NEG                                       | NEG                                       | NEG                                  | NEG                               | NEG                                       | NEG                                       |
| GKP138-52: in silico prediction         | NEG                                      | NEG                            | NEG              | NEG                           | NEG   | NEG   | NEG  | NEG  | NEG                                       | NEG                                       | NEG                                       | NEG                                       | NEG                                       | NEG                                       | NEG                                  | NEG                               | NEG                                       | NEG                                       |
| GKP138-78: in silico prediction         | NEG                                      | NEG                            | NEG              | NEG                           | NEG   | NEG   | NEG  | NEG  | NEG                                       | NEG                                       | NEG                                       | NEG                                       | NEG                                       | NEG                                       | NEG                                  | NEG                               | NEG                                       | NEG                                       |
| GKP136-4: in silico prediction          | NEG                                      | NEG                            | NEG              | NEG                           | NEG   | NEG   | NEG  | NEG  | NEG                                       | NEG                                       | NEG                                       | NEG                                       | NEG                                       | NEG                                       | NEG                                  | NEG                               | NEG                                       | NEG                                       |
| ZTA09_03668_9_HSA: in silico prediction | NEG                                      | NEG                            | NEG              | NEG                           | NEG   | NEG   | NEG  | NEG  | NEG                                       | NEG                                       | NEG                                       | NEG                                       | NEG                                       | NEG                                       | NEG                                  | NEG                               | NEG                                       | NEG                                       |
| GKP136-58: in silico prediction         | NEG                                      | NEG                            | NEG              | NEG                           | NEG   | NEG   | NEG  | NEG  | NEG                                       | NEG                                       | NEG                                       | NEG                                       | NEG                                       | NEG                                       | NEG                                  | NEG                               | NEG                                       | NEG                                       |
| 004_0004_23k: in silico prediction      | NEG                                      | NEG                            | NEG              | NEG                           | NEG   | NEG   | NEG  | NEG  | NEG                                       | NEG                                       | NEG                                       | NEG                                       | NEG                                       | NEG                                       | NEG                                  | NEG                               | NEG                                       | NEG                                       |
| BA06_02038: in silico prediction        | NEG                                      | NEG                            | NEG              | NEG                           | NEG   | NEG   | NEG  | NEG  | NEG                                       | NEG                                       | NEG                                       | NEG                                       | NEG                                       | NEG                                       | NEG                                  | NEG                               | NEG                                       | NEG                                       |
| GKP138-4: in silico prediction          | NEG                                      | NEG                            | NEG              | NEG                           | NEG   | NEG   | NEG  | NEG  | NEG                                       | NEG                                       | NEG                                       | NEG                                       | NEG                                       | NEG                                       | NEG                                  | NEG                               | NEG                                       | NEG                                       |
| ZTA10_02421_9_HSA: in silico prediction | NEG                                      | NEG                            | NEG              | NEG                           | NEG   | NEG   | NEG  | NEG  | NEG                                       | NEG                                       | NEG                                       | NEG                                       | NEG                                       | NEG                                       | NEG                                  | NEG                               | NEG                                       | NEG                                       |
| GKP136-62: in silico prediction         | NEG                                      | NEG                            | NEG              | NEG                           | NEG   | NEG   | NEG  | NEG  | POS                                       | POS                                       | NEG                                       | NEG                                       | NEG                                       | NEG                                       | NEG                                  | NEG                               | NEG                                       | NEG                                       |
| LGA251: in silico prediction            | NEG                                      | NEG                            | NEG              | NEG                           | NEG   | NEG   | NEG  | NEG  | NEG                                       | AMB                                       | NEG                                       | NEG                                       | NEG                                       | NEG                                       | NEG                                  | NEG                               | NEG                                       | NEG                                       |
| UK_NCTC13552: in silico prediction      | NEG                                      | NEG                            | NEG              | NEG                           | NEG   | NEG   | NEG  | NEG  | NEG                                       | AMB                                       | NEG                                       | NEG                                       | NEG                                       | NEG                                       | NEG                                  | NEG                               | NEG                                       | NEG                                       |
| GKP138-71: in silico prediction         | NEG                                      | NEG                            | NEG              | NEG                           | NEG   | NEG   | NEG  | NEG  | NEG                                       | AMB                                       | NEG                                       | NEG                                       | NEG                                       | NEG                                       | NEG                                  | NEG                               | NEG                                       | NEG                                       |
| cat-mandible-2013: in silico prediction | NEG                                      | NEG                            | NEG              | NEG                           | NEG   | NEG   | NEG  | NEG  | NEG                                       | AMB                                       | NEG                                       | NEG                                       | NEG                                       | NEG                                       | NEG                                  | NEG                               | NEG                                       | NEG                                       |
| 10_7350_D: in silico prediction         | NEG                                      | NEG                            | NEG              | NEG                           | NEG   | NEG   | NEG  | NEG  | NEG                                       | AMB                                       | NEG                                       | NEG                                       | NEG                                       | NEG                                       | NEG                                  | NEG                               | NEG                                       | NEG                                       |
| H114440275_A: in silico prediction      | NEG                                      | NEG                            | NEG              | NEG                           | NEG   | NEG   | NEG  | NEG  | NEG                                       | AMB                                       | NEG                                       | NEG                                       | NEG                                       | NEG                                       | NEG                                  | NEG                               | NEG                                       | NEG                                       |

| STRAIN / ISOLATE                        | HEAVY METAL RESISTANCES, SCCmec AND OTHERS |                            |                            |                         |                                   |                           |                                                           |                                 |       |            |                    |                                  |
|-----------------------------------------|--------------------------------------------|----------------------------|----------------------------|-------------------------|-----------------------------------|---------------------------|-----------------------------------------------------------|---------------------------------|-------|------------|--------------------|----------------------------------|
|                                         | merA                                       | merB                       | mco -plasmid               | copA2 -<br>plasmid      | copA2 -SCC                        | mco -SCC                  | arsA                                                      | arsD                            | arsD2 | arsB       |                    |                                  |
|                                         |                                            |                            |                            |                         |                                   |                           |                                                           |                                 |       | arsB (SCC) | arsB<br>(chromos.) | arsB<br>(chromos.-<br>argenteus) |
|                                         |                                            |                            |                            |                         |                                   |                           |                                                           |                                 |       |            |                    |                                  |
| mercury resistance operon               | Multi copper<br>oxidase                    | Copper exporting<br>ATPase | Copper exporting<br>ATPase | Multi copper<br>oxidase | arsenical pump-<br>driving ATPase | Putative<br>dehydrogenase | trans-acting<br>repressor of arsenic<br>resistance operon | arsenical pump membrane protein |       |            |                    |                                  |
| V40-124624                              | NEG                                        | NEG                        | NEG                        | NEG                     | NEG                               | NEG                       | NEG                                                       | NEG                             | NEG   | NEG        | POS                | NEG                              |
| V40-124624: in silico prediction        | NEG                                        | NEG                        | NEG                        | NEG                     | NEG                               | NEG                       | NEG                                                       | NEG                             | NEG   | NEG        | POS                | NEG                              |
| SA-120: in silico prediction            | NEG                                        | NEG                        | NEG                        | NEG                     | NEG                               | NEG                       | NEG                                                       | NEG                             | NEG   | NEG        | POS                | NEG                              |
| 61908: in silico prediction             | NEG                                        | NEG                        | NEG                        | NEG                     | NEG                               | NEG                       | NEG                                                       | NEG                             | NEG   | NEG        | POS                | NEG                              |
| M1790_98_1: in silico prediction        | NEG                                        | NEG                        | NEG                        | NEG                     | NEG                               | NEG                       | NEG                                                       | NEG                             | NEG   | NEG        | POS                | NEG                              |
| GKP138-13: in silico prediction         | NEG                                        | NEG                        | NEG                        | NEG                     | NEG                               | NEG                       | NEG                                                       | NEG                             | NEG   | NEG        | POS                | NEG                              |
| GKP138-2: in silico prediction          | NEG                                        | NEG                        | NEG                        | NEG                     | NEG                               | NEG                       | NEG                                                       | NEG                             | NEG   | NEG        | POS                | NEG                              |
| GKP138-31: in silico prediction         | NEG                                        | NEG                        | NEG                        | NEG                     | NEG                               | NEG                       | NEG                                                       | NEG                             | NEG   | NEG        | POS                | NEG                              |
| GKP138-33: in silico prediction         | NEG                                        | NEG                        | NEG                        | NEG                     | NEG                               | NEG                       | NEG                                                       | NEG                             | NEG   | NEG        | POS                | NEG                              |
| GKP138-52: in silico prediction         | NEG                                        | NEG                        | NEG                        | NEG                     | NEG                               | NEG                       | NEG                                                       | NEG                             | NEG   | NEG        | POS                | NEG                              |
| GKP138-78: in silico prediction         | NEG                                        | NEG                        | NEG                        | NEG                     | NEG                               | NEG                       | NEG                                                       | NEG                             | NEG   | NEG        | POS                | NEG                              |
| GKP136-4: in silico prediction          | NEG                                        | NEG                        | NEG                        | NEG                     | NEG                               | NEG                       | NEG                                                       | NEG                             | NEG   | NEG        | POS                | NEG                              |
| ZTA09_03668_9_HSA: in silico prediction | NEG                                        | NEG                        | NEG                        | NEG                     | NEG                               | NEG                       | NEG                                                       | NEG                             | NEG   | NEG        | POS                | NEG                              |
| GKP136-58: in silico prediction         | NEG                                        | NEG                        | NEG                        | NEG                     | NEG                               | NEG                       | NEG                                                       | NEG                             | NEG   | NEG        | POS                | NEG                              |
| 004_0004_23k: in silico prediction      | NEG                                        | NEG                        | NEG                        | NEG                     | NEG                               | NEG                       | NEG                                                       | NEG                             | NEG   | NEG        | POS                | NEG                              |
| BA06_02038: in silico prediction        | NEG                                        | NEG                        | NEG                        | NEG                     | NEG                               | NEG                       | NEG                                                       | NEG                             | NEG   | NEG        | POS                | NEG                              |
| GKP138-4: in silico prediction          | NEG                                        | NEG                        | NEG                        | NEG                     | NEG                               | NEG                       | NEG                                                       | NEG                             | NEG   | NEG        | POS                | NEG                              |
| ZTA10_02421_9_HSA: in silico prediction | NEG                                        | NEG                        | NEG                        | NEG                     | NEG                               | NEG                       | NEG                                                       | NEG                             | NEG   | NEG        | POS                | NEG                              |
| GKP136-62: in silico prediction         | NEG                                        | NEG                        | NEG                        | NEG                     | NEG                               | NEG                       | NEG                                                       | NEG                             | NEG   | NEG        | POS                | NEG                              |
| LGA251: in silico prediction            | NEG                                        | NEG                        | NEG                        | NEG                     | NEG                               | AMB                       | NEG                                                       | NEG                             | NEG   | NEG        | POS                | NEG                              |
| UK_NCTC13552: in silico prediction      | NEG                                        | NEG                        | NEG                        | NEG                     | NEG                               | AMB                       | NEG                                                       | NEG                             | NEG   | NEG        | POS                | NEG                              |
| GKP138-74: in silico prediction         | NEG                                        | NEG                        | NEG                        | NEG                     | NEG                               | AMB                       | NEG                                                       | NEG                             | NEG   | POS        | POS                | NEG                              |
| cat-mandible-2013: in silico prediction | NEG                                        | NEG                        | NEG                        | NEG                     | NEG                               | AMB                       | NEG                                                       | NEG                             | NEG   | POS        | NEG                | NEG                              |
| 10_7350_D: in silico prediction         | NEG                                        | NEG                        | NEG                        | NEG                     | NEG                               | AMB                       | NEG                                                       | NEG                             | NEG   | POS        | POS                | NEG                              |
| H114440275_A: in silico prediction      | NEG                                        | NEG                        | NEG                        | NEG                     | NEG                               | AMB                       | NEG                                                       | NEG                             | NEG   | POS        | POS                | NEG                              |

[illegible]



[illegible]

[illegible]

| STRAIN / ISOLATE                        | RESISTANCE : MISCELLANEOUS GENES    |                                 |                         |                         | RESISTANCE : MISCELLANEOUS GENES |                                     |                         |                         |                         |        |        |                                   |                            |                                      |                                 |                          |                                                   |                                                   |     |                             |
|-----------------------------------------|-------------------------------------|---------------------------------|-------------------------|-------------------------|----------------------------------|-------------------------------------|-------------------------|-------------------------|-------------------------|--------|--------|-----------------------------------|----------------------------|--------------------------------------|---------------------------------|--------------------------|---------------------------------------------------|---------------------------------------------------|-----|-----------------------------|
|                                         | sat                                 | dfrA                            | dfrG                    | far1                    | mupA                             | mupB                                | tetK                    | tetL                    | tetM                    |        |        | cat                               | cfr                        | fexA                                 | apmA                            | fosB                     | qacA                                              | qacC                                              | smr | vanA ,vanB, vanZ            |
|                                         |                                     |                                 |                         |                         |                                  |                                     |                         |                         | tetM                    | tetM-O | tetM-S |                                   |                            |                                      |                                 |                          |                                                   |                                                   |     |                             |
|                                         | strepto-thricine-acetyl-transferase | dihydro-folate-reductase type 1 | dihydrofolate-reductase | fusidic acid resistance | mupirocin resistance protein     | plasmidic isoleucyl-tRNA synthetase | tetracycline resistance | Tetracycline resistance | tetracycline resistance |        |        | chloramphenicol acetyltransferase | 23S rRNA methyltransferase | chloramphenicol/florfenicol exporter | aminocyclitol acetyltransferase | metallothiol transferase | quaternary ammonium compound resistance protein A | quaternary ammonium compound resistance protein C |     | vancomycin resistance genes |
| V40-124624                              | NEG                                 | NEG                             | NEG                     | NEG                     | NEG                              | NEG                                 | NEG                     | NEG                     | NEG                     | NEG    | NEG    | NEG                               | NEG                        | NEG                                  | NEG                             | POS                      | NEG                                               | NEG                                               | NEG | NEG                         |
| V40-124624: in silico prediction        | NEG                                 | NEG                             | NEG                     | NEG                     | NEG                              | NEG                                 | NEG                     | NEG                     | NEG                     | NEG    | NEG    | NEG                               | NEG                        | NEG                                  | NEG                             | POS                      | NEG                                               | NEG                                               | NEG | NEG                         |
| SA-120: in silico prediction            | NEG                                 | NEG                             | NEG                     | NEG                     | NEG                              | NEG                                 | NEG                     | NEG                     | NEG                     | NEG    | NEG    | NEG                               | NEG                        | NEG                                  | NEG                             | POS                      | NEG                                               | NEG                                               | NEG | NEG                         |
| 61908: in silico prediction             | NEG                                 | NEG                             | NEG                     | NEG                     | NEG                              | NEG                                 | NEG                     | NEG                     | NEG                     | NEG    | NEG    | NEG                               | NEG                        | NEG                                  | NEG                             | POS                      | NEG                                               | NEG                                               | NEG | NEG                         |
| M1790_98_1: in silico prediction        | NEG                                 | NEG                             | NEG                     | NEG                     | NEG                              | NEG                                 | NEG                     | NEG                     | NEG                     | NEG    | NEG    | NEG                               | NEG                        | NEG                                  | NEG                             | POS                      | NEG                                               | NEG                                               | NEG | NEG                         |
| GKP138-13: in silico prediction         | NEG                                 | NEG                             | NEG                     | NEG                     | NEG                              | NEG                                 | NEG                     | NEG                     | NEG                     | NEG    | NEG    | NEG                               | NEG                        | NEG                                  | NEG                             | POS                      | NEG                                               | NEG                                               | NEG | NEG                         |
| GKP138-2: in silico prediction          | NEG                                 | NEG                             | NEG                     | NEG                     | NEG                              | NEG                                 | NEG                     | NEG                     | NEG                     | NEG    | NEG    | NEG                               | NEG                        | NEG                                  | NEG                             | POS                      | NEG                                               | NEG                                               | NEG | NEG                         |
| GKP138-31: in silico prediction         | NEG                                 | NEG                             | NEG                     | NEG                     | NEG                              | NEG                                 | NEG                     | NEG                     | NEG                     | NEG    | NEG    | NEG                               | NEG                        | NEG                                  | NEG                             | POS                      | NEG                                               | NEG                                               | NEG | NEG                         |
| GKP138-33: in silico prediction         | NEG                                 | NEG                             | NEG                     | NEG                     | NEG                              | NEG                                 | NEG                     | NEG                     | NEG                     | NEG    | NEG    | NEG                               | NEG                        | NEG                                  | NEG                             | POS                      | NEG                                               | NEG                                               | NEG | NEG                         |
| GKP138-52: in silico prediction         | NEG                                 | NEG                             | NEG                     | NEG                     | NEG                              | NEG                                 | NEG                     | NEG                     | NEG                     | NEG    | NEG    | NEG                               | NEG                        | NEG                                  | NEG                             | POS                      | NEG                                               | NEG                                               | NEG | NEG                         |
| GKP138-78: in silico prediction         | NEG                                 | NEG                             | NEG                     | NEG                     | NEG                              | NEG                                 | NEG                     | NEG                     | NEG                     | NEG    | NEG    | NEG                               | NEG                        | NEG                                  | NEG                             | POS                      | NEG                                               | NEG                                               | NEG | NEG                         |
| GKP136-4: in silico prediction          | NEG                                 | NEG                             | NEG                     | NEG                     | NEG                              | NEG                                 | NEG                     | NEG                     | NEG                     | NEG    | NEG    | NEG                               | NEG                        | NEG                                  | NEG                             | POS                      | NEG                                               | NEG                                               | NEG | NEG                         |
| ZTA09_03668_9_HSA: in silico prediction | NEG                                 | NEG                             | NEG                     | NEG                     | NEG                              | NEG                                 | NEG                     | NEG                     | NEG                     | NEG    | NEG    | NEG                               | NEG                        | NEG                                  | NEG                             | POS                      | NEG                                               | NEG                                               | NEG | NEG                         |
| GKP136-58: in silico prediction         | NEG                                 | NEG                             | NEG                     | NEG                     | NEG                              | NEG                                 | NEG                     | NEG                     | NEG                     | NEG    | NEG    | NEG                               | NEG                        | NEG                                  | NEG                             | POS                      | NEG                                               | NEG                                               | NEG | NEG                         |
| 004_0004_23k: in silico prediction      | NEG                                 | NEG                             | NEG                     | NEG                     | NEG                              | NEG                                 | POS                     | NEG                     | NEG                     | NEG    | NEG    | NEG                               | NEG                        | NEG                                  | NEG                             | POS                      | NEG                                               | NEG                                               | NEG | NEG                         |
| BA06_02038: in silico prediction        | NEG                                 | NEG                             | NEG                     | NEG                     | NEG                              | NEG                                 | POS                     | NEG                     | NEG                     | NEG    | NEG    | NEG                               | NEG                        | NEG                                  | NEG                             | POS                      | NEG                                               | NEG                                               | NEG | NEG                         |
| GKP138-4: in silico prediction          | NEG                                 | NEG                             | NEG                     | NEG                     | NEG                              | NEG                                 | NEG                     | NEG                     | NEG                     | NEG    | NEG    | NEG                               | NEG                        | NEG                                  | NEG                             | POS                      | NEG                                               | NEG                                               | NEG | NEG                         |
| ZTA10_02421_9_HSA: in silico prediction | NEG                                 | NEG                             | NEG                     | NEG                     | NEG                              | NEG                                 | NEG                     | NEG                     | NEG                     | NEG    | NEG    | NEG                               | NEG                        | NEG                                  | NEG                             | POS                      | NEG                                               | NEG                                               | NEG | NEG                         |
| GKP136-62: in silico prediction         | NEG                                 | NEG                             | NEG                     | NEG                     | NEG                              | NEG                                 | NEG                     | NEG                     | NEG                     | NEG    | NEG    | NEG                               | NEG                        | NEG                                  | NEG                             | POS                      | NEG                                               | NEG                                               | NEG | NEG                         |
| LGA251: in silico prediction            | NEG                                 | NEG                             | NEG                     | NEG                     | NEG                              | NEG                                 | NEG                     | NEG                     | NEG                     | NEG    | NEG    | NEG                               | NEG                        | NEG                                  | NEG                             | POS                      | NEG                                               | NEG                                               | NEG | NEG                         |
| UK_NCTC13552: in silico prediction      | NEG                                 | NEG                             | NEG                     | NEG                     | NEG                              | NEG                                 | NEG                     | NEG                     | NEG                     | NEG    | NEG    | NEG                               | NEG                        | NEG                                  | NEG                             | POS                      | NEG                                               | NEG                                               | NEG | NEG                         |
| GKP138-71: in silico prediction         | NEG                                 | NEG                             | NEG                     | NEG                     | NEG                              | NEG                                 | NEG                     | NEG                     | NEG                     | NEG    | NEG    | NEG                               | NEG                        | NEG                                  | NEG                             | POS                      | NEG                                               | NEG                                               | NEG | NEG                         |
| cat-mandible-2013: in silico prediction | NEG                                 | NEG                             | NEG                     | NEG                     | NEG                              | NEG                                 | NEG                     | NEG                     | NEG                     | NEG    | NEG    | NEG                               | NEG                        | NEG                                  | NEG                             | POS                      | NEG                                               | NEG                                               | NEG | NEG                         |
| 10_7350_D: in silico prediction         | NEG                                 | NEG                             | NEG                     | NEG                     | NEG                              | NEG                                 | NEG                     | NEG                     | NEG                     | NEG    | NEG    | NEG                               | NEG                        | NEG                                  | NEG                             | POS                      | NEG                                               | NEG                                               | NEG | NEG                         |
| H114440275_A: in silico prediction      | NEG                                 | NEG                             | NEG                     | NEG                     | NEG                              | NEG                                 | NEG                     | NEG                     | NEG                     | NEG    | NEG    | NEG                               | NEG                        | NEG                                  | NEG                             | POS                      | NEG                                               | NEG                                               | NEG | NEG                         |

[illegible]

| STRAIN / ISOLATE                        | VIRULENCE : ENTEROTOXINS |               |               |               |               |                        |                                   |                                            | VIRULENCE : HLG AND LEUKOCIDINS            |                   |                              |                                         |                                         |                                      |                                      |                        |                        |                                             |                                            |      |      |                  |
|-----------------------------------------|--------------------------|---------------|---------------|---------------|---------------|------------------------|-----------------------------------|--------------------------------------------|--------------------------------------------|-------------------|------------------------------|-----------------------------------------|-----------------------------------------|--------------------------------------|--------------------------------------|------------------------|------------------------|---------------------------------------------|--------------------------------------------|------|------|------------------|
|                                         | egc (total)              | selg          | seli          | selm          | sen           | selo                   | selu                              | ORF CM14                                   | lukF                                       | lukS              |                              | hlgA                                    | lukF/S (int)                            | lukF-PV                              | lukS-PV                              | lukF-PV (P83)          | lukM                   | lukD                                        | lukE                                       | lukX | lukY |                  |
|                                         |                          |               |               |               |               |                        |                                   |                                            |                                            | lukS              | lukS (ST22+ST45)             |                                         |                                         |                                      |                                      |                        |                        |                                             |                                            |      | lukY | lukY (ST30+ST45) |
|                                         |                          |               |               |               |               |                        |                                   |                                            |                                            |                   |                              |                                         |                                         |                                      |                                      |                        |                        |                                             |                                            |      |      |                  |
| egc cluster                             | Enterotoxin G            | Enterotoxin I | Enterotoxin M | Enterotoxin N | Enterotoxin O | Enterotoxin U and/or Y | Enterotoxin-like protein ORF CM14 | Haemolysin gamma / leukocidin, component B | Haemolysin gamma / leukocidin, component C | Haemolysin gamma, | intermedius group leukocidin | Panton Valentine leukocidin F component | Panton Valentine leukocidin S component | F component from ruminant leukocidin | S component from ruminant leukocidin | leukocidin D component | leukocidin E component | leukocidin/ haemolysin toxin family protein | leukocidin/haemolysin toxin family protein |      |      |                  |
| V40-124624                              | NEG                      | NEG           | NEG           | NEG           | NEG           | NEG                    | NEG                               | NEG                                        | POS                                        | POS               | AMB                          | POS                                     | NEG                                     | NEG                                  | NEG                                  | NEG                    | NEG                    | POS                                         | NEG                                        | POS  | POS  | NEG              |
| V40-124624: in silico prediction        | NEG                      | NEG           | NEG           | NEG           | NEG           | NEG                    | NEG                               | NEG                                        | POS                                        | POS               | AMB                          | POS                                     | NEG                                     | NEG                                  | NEG                                  | NEG                    | NEG                    | POS                                         | AMB                                        | POS  | POS  | NEG              |
| SA-120: in silico prediction            | NEG                      | NEG           | NEG           | NEG           | NEG           | NEG                    | NEG                               | NEG                                        | POS                                        | POS               | AMB                          | POS                                     | NEG                                     | NEG                                  | NEG                                  | NEG                    | NEG                    | POS                                         | AMB                                        | POS  | POS  | NEG              |
| 61908: in silico prediction             | NEG                      | NEG           | NEG           | NEG           | NEG           | NEG                    | NEG                               | NEG                                        | POS                                        | POS               | AMB                          | POS                                     | NEG                                     | NEG                                  | NEG                                  | NEG                    | NEG                    | POS                                         | AMB                                        | POS  | POS  | NEG              |
| M1790_98_1: in silico prediction        | NEG                      | NEG           | NEG           | NEG           | NEG           | NEG                    | NEG                               | NEG                                        | POS                                        | POS               | AMB                          | POS                                     | NEG                                     | NEG                                  | NEG                                  | NEG                    | NEG                    | POS                                         | AMB                                        | POS  | POS  | NEG              |
| GKP138-13: in silico prediction         | NEG                      | NEG           | NEG           | NEG           | NEG           | NEG                    | NEG                               | NEG                                        | POS                                        | POS               | AMB                          | POS                                     | NEG                                     | NEG                                  | NEG                                  | NEG                    | NEG                    | POS                                         | AMB                                        | POS  | POS  | NEG              |
| GKP138-2: in silico prediction          | NEG                      | NEG           | NEG           | NEG           | NEG           | NEG                    | NEG                               | NEG                                        | POS                                        | POS               | AMB                          | POS                                     | NEG                                     | NEG                                  | NEG                                  | NEG                    | NEG                    | POS                                         | AMB                                        | POS  | POS  | NEG              |
| GKP138-31: in silico prediction         | NEG                      | NEG           | NEG           | NEG           | NEG           | NEG                    | NEG                               | NEG                                        | POS                                        | POS               | AMB                          | POS                                     | NEG                                     | NEG                                  | NEG                                  | NEG                    | NEG                    | POS                                         | AMB                                        | POS  | POS  | NEG              |
| GKP138-33: in silico prediction         | NEG                      | NEG           | NEG           | NEG           | NEG           | NEG                    | NEG                               | NEG                                        | POS                                        | POS               | AMB                          | POS                                     | NEG                                     | NEG                                  | NEG                                  | NEG                    | NEG                    | POS                                         | AMB                                        | POS  | POS  | NEG              |
| GKP138-52: in silico prediction         | NEG                      | NEG           | NEG           | NEG           | NEG           | NEG                    | NEG                               | NEG                                        | POS                                        | POS               | AMB                          | POS                                     | NEG                                     | NEG                                  | NEG                                  | NEG                    | NEG                    | POS                                         | AMB                                        | POS  | POS  | NEG              |
| GKP138-78: in silico prediction         | NEG                      | NEG           | NEG           | NEG           | NEG           | NEG                    | NEG                               | NEG                                        | POS                                        | POS               | AMB                          | POS                                     | NEG                                     | NEG                                  | NEG                                  | NEG                    | NEG                    | POS                                         | AMB                                        | POS  | POS  | NEG              |
| GKP136-4: in silico prediction          | NEG                      | NEG           | NEG           | NEG           | NEG           | NEG                    | NEG                               | NEG                                        | POS                                        | POS               | AMB                          | POS                                     | NEG                                     | NEG                                  | NEG                                  | NEG                    | NEG                    | POS                                         | AMB                                        | POS  | POS  | NEG              |
| ZTA09_03668_9_HSA: in silico prediction | NEG                      | NEG           | NEG           | NEG           | NEG           | NEG                    | NEG                               | NEG                                        | POS                                        | POS               | AMB                          | POS                                     | NEG                                     | NEG                                  | NEG                                  | NEG                    | NEG                    | POS                                         | AMB                                        | POS  | POS  | NEG              |
| GKP136-58: in silico prediction         | NEG                      | NEG           | NEG           | NEG           | NEG           | NEG                    | NEG                               | NEG                                        | POS                                        | POS               | AMB                          | POS                                     | NEG                                     | NEG                                  | NEG                                  | NEG                    | NEG                    | POS                                         | AMB                                        | POS  | POS  | NEG              |
| 004_0004_23k: in silico prediction      | NEG                      | NEG           | NEG           | NEG           | NEG           | NEG                    | NEG                               | NEG                                        | POS                                        | POS               | AMB                          | POS                                     | NEG                                     | NEG                                  | NEG                                  | NEG                    | NEG                    | POS                                         | AMB                                        | POS  | POS  | NEG              |
| BA06_02038: in silico prediction        | NEG                      | NEG           | NEG           | NEG           | NEG           | NEG                    | NEG                               | NEG                                        | POS                                        | POS               | AMB                          | POS                                     | NEG                                     | NEG                                  | NEG                                  | NEG                    | NEG                    | POS                                         | AMB                                        | POS  | POS  | NEG              |
| GKP138-4: in silico prediction          | NEG                      | NEG           | NEG           | NEG           | NEG           | NEG                    | NEG                               | NEG                                        | POS                                        | POS               | AMB                          | POS                                     | NEG                                     | NEG                                  | NEG                                  | NEG                    | NEG                    | POS                                         | AMB                                        | POS  | POS  | NEG              |
| ZTA10_02421_9_HSA: in silico prediction | NEG                      | NEG           | NEG           | NEG           | NEG           | NEG                    | NEG                               | NEG                                        | POS                                        | POS               | AMB                          | POS                                     | NEG                                     | NEG                                  | NEG                                  | NEG                    | NEG                    | POS                                         | AMB                                        | POS  | POS  | NEG              |
| GKP136-62: in silico prediction         | NEG                      | NEG           | NEG           | NEG           | NEG           | NEG                    | NEG                               | NEG                                        | POS                                        | POS               | AMB                          | POS                                     | NEG                                     | NEG                                  | NEG                                  | NEG                    | NEG                    | POS                                         | AMB                                        | POS  | POS  | NEG              |
| LGA251: in silico prediction            | NEG                      | NEG           | NEG           | NEG           | NEG           | NEG                    | NEG                               | NEG                                        | POS                                        | POS               | AMB                          | POS                                     | NEG                                     | NEG                                  | NEG                                  | NEG                    | NEG                    | POS                                         | AMB                                        | POS  | POS  | NEG              |
| UK_NCTC13552: in silico prediction      | NEG                      | NEG           | NEG           | NEG           | NEG           | NEG                    | NEG                               | NEG                                        | POS                                        | POS               | AMB                          | POS                                     | NEG                                     | NEG                                  | NEG                                  | NEG                    | NEG                    | POS                                         | AMB                                        | POS  | POS  | NEG              |
| GKP138-71: in silico prediction         | NEG                      | NEG           | NEG           | NEG           | NEG           | NEG                    | NEG                               | NEG                                        | POS                                        | POS               | AMB                          | POS                                     | NEG                                     | NEG                                  | NEG                                  | NEG                    | NEG                    | POS                                         | AMB                                        | POS  | POS  | NEG              |
| cat-mandible-2013: in silico prediction | NEG                      | NEG           | NEG           | NEG           | NEG           | NEG                    | NEG                               | NEG                                        | POS                                        | POS               | AMB                          | POS                                     | NEG                                     | NEG                                  | NEG                                  | NEG                    | NEG                    | POS                                         | AMB                                        | POS  | POS  | NEG              |
| 10_7350_D: in silico prediction         | NEG                      | NEG           | NEG           | NEG           | NEG           | NEG                    | NEG                               | NEG                                        | POS                                        | POS               | AMB                          | POS                                     | NEG                                     | NEG                                  | NEG                                  | NEG                    | NEG                    | POS                                         | AMB                                        | POS  | POS  | NEG              |
| H114440275_A: in silico prediction      | NEG                      | NEG           | NEG           | NEG           | NEG           | NEG                    | NEG                               | NEG                                        | POS                                        | POS               | AMB                          | POS                                     | NEG                                     | NEG                                  | NEG                                  | NEG                    | NEG                    | POS                                         | AMB                                        | POS  | POS  | NEG              |

[illegible]

| STRAIN / ISOLATE                        | VIRULENCE : PROTEASES |                          |               |                   |                   |                   |                       |                        |                                         |                        |                                | VIRULENCE : STAPHYLOCOCCAL SUPERANTIGEN/ENTEROTOXIN-LIKE GENES (SET/SSL) |                         |                           |                      |                    |                            |                                            |                      |  |  |
|-----------------------------------------|-----------------------|--------------------------|---------------|-------------------|-------------------|-------------------|-----------------------|------------------------|-----------------------------------------|------------------------|--------------------------------|--------------------------------------------------------------------------|-------------------------|---------------------------|----------------------|--------------------|----------------------------|--------------------------------------------|----------------------|--|--|
|                                         | aur                   |                          |               | splA              | splB              | splE              | sspA                  | sspB                   | sspP                                    |                        | setC / selX                    | ssl01                                                                    |                         |                           |                      |                    |                            | ssl02                                      |                      |  |  |
|                                         | aur (cons)            | aur (Other than MRSA252) | aur (MRSA252) |                   |                   |                   |                       |                        | sspP (cons)                             | sspP (other than ST93) |                                | ssl01/set6 (COL)                                                         | ssl01/set6 (Mu50+ N315) | ssl01/set6 (MW2+ MSSA476) | ssl01/set6 (MRSA252) | ssl01/set6 (RF122) | ssl01/set6 (other alleles) | ssl02/set7                                 | ssl02/set7 (MRSA252) |  |  |
|                                         |                       |                          |               |                   |                   |                   |                       |                        |                                         |                        |                                |                                                                          |                         |                           |                      |                    |                            |                                            |                      |  |  |
|                                         | aureolysin            |                          |               | serin- protease A | serin- protease B | serin- protease E | glutamylendopeptidase | Staphopain B, protease | Staphopain A (Staphylopain A), protease |                        | Staphyl. exotoxin-like protein | Staphylococcal superantigen-like protein 1                               |                         |                           |                      |                    |                            | Staphylococcal superantigen-like protein 2 |                      |  |  |
| V40-124624                              | POS                   | POS                      | NEG           | POS               | POS               | POS               | POS                   | POS                    | POS                                     | POS                    | POS                            | NEG                                                                      | NEG                     | NEG                       | NEG                  | POS                | NEG                        | POS                                        | NEG                  |  |  |
| V40-124624: in silico prediction        | POS                   | POS                      | NEG           | POS               | POS               | POS               | POS                   | POS                    | POS                                     | POS                    | POS                            | NEG                                                                      | NEG                     | NEG                       | NEG                  | POS                | NEG                        | POS                                        | NEG                  |  |  |
| SA-120: in silico prediction            | POS                   | POS                      | NEG           | POS               | POS               | POS               | POS                   | POS                    | POS                                     | POS                    | POS                            | NEG                                                                      | NEG                     | NEG                       | NEG                  | POS                | NEG                        | POS                                        | AMB                  |  |  |
| 61908: in silico prediction             | POS                   | POS                      | NEG           | POS               | POS               | POS               | POS                   | POS                    | POS                                     | POS                    | POS                            | NEG                                                                      | NEG                     | NEG                       | NEG                  | POS                | NEG                        | POS                                        | AMB                  |  |  |
| M1790_98_1: in silico prediction        | POS                   | POS                      | NEG           | POS               | POS               | NEG               | POS                   | POS                    | POS                                     | POS                    | POS                            | NEG                                                                      | NEG                     | NEG                       | NEG                  | POS                | NEG                        | POS                                        | AMB                  |  |  |
| GKP138-13: in silico prediction         | POS                   | POS                      | NEG           | POS               | POS               | POS               | POS                   | POS                    | POS                                     | POS                    | POS                            | NEG                                                                      | NEG                     | NEG                       | NEG                  | POS                | NEG                        | POS                                        | AMB                  |  |  |
| GKP138-2: in silico prediction          | POS                   | POS                      | NEG           | POS               | POS               | POS               | POS                   | POS                    | POS                                     | POS                    | POS                            | NEG                                                                      | NEG                     | NEG                       | NEG                  | POS                | NEG                        | POS                                        | AMB                  |  |  |
| GKP138-31: in silico prediction         | POS                   | POS                      | NEG           | POS               | POS               | POS               | POS                   | POS                    | POS                                     | POS                    | POS                            | NEG                                                                      | NEG                     | NEG                       | NEG                  | POS                | NEG                        | POS                                        | AMB                  |  |  |
| GKP138-33: in silico prediction         | POS                   | POS                      | NEG           | POS               | POS               | POS               | POS                   | POS                    | POS                                     | POS                    | POS                            | NEG                                                                      | NEG                     | NEG                       | NEG                  | POS                | NEG                        | POS                                        | AMB                  |  |  |
| GKP138-52: in silico prediction         | POS                   | POS                      | NEG           | POS               | POS               | POS               | POS                   | POS                    | POS                                     | POS                    | POS                            | NEG                                                                      | NEG                     | NEG                       | NEG                  | POS                | NEG                        | POS                                        | AMB                  |  |  |
| GKP138-78: in silico prediction         | POS                   | POS                      | NEG           | POS               | POS               | POS               | POS                   | POS                    | POS                                     | POS                    | POS                            | NEG                                                                      | NEG                     | NEG                       | NEG                  | POS                | NEG                        | POS                                        | AMB                  |  |  |
| GKP136-4: in silico prediction          | POS                   | POS                      | NEG           | POS               | POS               | POS               | POS                   | POS                    | POS                                     | POS                    | POS                            | NEG                                                                      | NEG                     | NEG                       | NEG                  | POS                | NEG                        | POS                                        | AMB                  |  |  |
| ZTA09_03668_9_HSA: in silico prediction | POS                   | POS                      | NEG           | POS               | POS               | POS               | POS                   | POS                    | POS                                     | POS                    | POS                            | NEG                                                                      | NEG                     | NEG                       | NEG                  | POS                | NEG                        | POS                                        | AMB                  |  |  |
| GKP136-58: in silico prediction         | POS                   | POS                      | NEG           | POS               | POS               | POS               | POS                   | POS                    | POS                                     | POS                    | POS                            | NEG                                                                      | NEG                     | NEG                       | NEG                  | POS                | NEG                        | POS                                        | AMB                  |  |  |
| 004_0004_23k: in silico prediction      | POS                   | POS                      | NEG           | POS               | POS               | POS               | POS                   | POS                    | POS                                     | POS                    | POS                            | NEG                                                                      | NEG                     | NEG                       | NEG                  | POS                | NEG                        | POS                                        | AMB                  |  |  |
| BA06_02038: in silico prediction        | POS                   | POS                      | NEG           | POS               | POS               | POS               | POS                   | POS                    | POS                                     | POS                    | POS                            | NEG                                                                      | NEG                     | NEG                       | NEG                  | POS                | NEG                        | POS                                        | AMB                  |  |  |
| GKP138-4: in silico prediction          | POS                   | POS                      | NEG           | POS               | POS               | POS               | POS                   | POS                    | POS                                     | POS                    | POS                            | NEG                                                                      | NEG                     | NEG                       | NEG                  | POS                | NEG                        | POS                                        | AMB                  |  |  |
| ZTA10_02421_9_HSA: in silico prediction | POS                   | POS                      | NEG           | POS               | POS               | NEG               | POS                   | POS                    | POS                                     | POS                    | POS                            | NEG                                                                      | NEG                     | NEG                       | NEG                  | POS                | NEG                        | POS                                        | AMB                  |  |  |
| GRP136-62: in silico prediction         | POS                   | POS                      | NEG           | POS               | POS               | POS               | POS                   | POS                    | POS                                     | POS                    | POS                            | NEG                                                                      | NEG                     | NEG                       | NEG                  | POS                | NEG                        | POS                                        | AMB                  |  |  |
| LGA251: in silico prediction            | POS                   | POS                      | NEG           | POS               | POS               | POS               | POS                   | POS                    | POS                                     | POS                    | POS                            | NEG                                                                      | NEG                     | NEG                       | NEG                  | POS                | NEG                        | POS                                        | AMB                  |  |  |
| UK_NCTC13552: in silico prediction      | POS                   | POS                      | NEG           | POS               | POS               | POS               | POS                   | POS                    | POS                                     | POS                    | POS                            | NEG                                                                      | NEG                     | NEG                       | NEG                  | POS                | NEG                        | POS                                        | NEG                  |  |  |
| GKP138-74: in silico prediction         | POS                   | POS                      | NEG           | POS               | POS               | POS               | POS                   | POS                    | POS                                     | POS                    | POS                            | NEG                                                                      | NEG                     | NEG                       | NEG                  | POS                | NEG                        | POS                                        | AMB                  |  |  |
| cat-mandible-2013: in silico prediction | POS                   | POS                      | NEG           | POS               | POS               | POS               | POS                   | POS                    | POS                                     | POS                    | POS                            | NEG                                                                      | NEG                     | NEG                       | NEG                  | POS                | NEG                        | POS                                        | AMB                  |  |  |
| 10_7350_D: in silico prediction         | POS                   | POS                      | NEG           | POS               | POS               | POS               | POS                   | POS                    | POS                                     | POS                    | POS                            | NEG                                                                      | NEG                     | NEG                       | NEG                  | POS                | NEG                        | POS                                        | AMB                  |  |  |
| H114440275_A: in silico prediction      | POS                   | POS                      | NEG           | POS               | POS               | POS               | POS                   | POS                    | POS                                     | POS                    | POS                            | NEG                                                                      | NEG                     | NEG                       | NEG                  | POS                | NEG                        | POS                                        | AMB                  |  |  |

| STRAIN / ISOLATE                        | VIRULENCE : STAPHYLOCOCCAL SUPERANTIGEN/ENTEROTOXIN-LIKE GENES (SET/SSL) |                                     |                                            |                                     |                                            |                                     |                         |                                            |                             |                                            |                         |                          |       | VIRULENCE : SET/SSL GENES                            |                                            |            |                                             |                         |                     |                                             |                                 |                         |
|-----------------------------------------|--------------------------------------------------------------------------|-------------------------------------|--------------------------------------------|-------------------------------------|--------------------------------------------|-------------------------------------|-------------------------|--------------------------------------------|-----------------------------|--------------------------------------------|-------------------------|--------------------------|-------|------------------------------------------------------|--------------------------------------------|------------|---------------------------------------------|-------------------------|---------------------|---------------------------------------------|---------------------------------|-------------------------|
|                                         | ssl03                                                                    |                                     | ssl04                                      |                                     | ssl05                                      |                                     |                         | ssl06                                      |                             | ssl07                                      |                         |                          | ssl08 | ssl09                                                |                                            | ssl10      |                                             |                         | ssl11               |                                             |                                 |                         |
|                                         | ssl03/set8                                                               | ssl03/set8<br>(MRSA252,<br>SAR0424) | ssl04/set9                                 | ssl04/set9<br>(MRSA252,<br>SAR0425) | ssl05/set3                                 | ssl05/set3<br>(RF122,<br>probe-611) | ssl05/set3<br>(MRSA252) | ssl06/set21                                | ssl06<br>(NCTC8325+<br>MW2) | ssl07/set1                                 | ssl07/set1<br>(MRSA252) | ssl07/set1<br>(AF188836) |       | ssl09/set5<br>probes 1&2                             | ssl09/set5<br>(MRSA252)                    | ssl10/set4 | ssl10<br>(RF122)                            | ssl10/set4<br>(MRSA252) | ssl11/set2<br>(COL) | ssl11/set2<br>(Mu50+<br>N315)               | ssl11/set2<br>(MW2+<br>MSSA476) | ssl11/set2<br>(MRSA252) |
|                                         | Staphylococcal superantigen-like protein 3                               |                                     | Staphylococcal superantigen-like protein 4 |                                     | Staphylococcal superantigen-like protein 5 |                                     |                         | Staphylococcal superantigen-like protein 6 |                             | Staphylococcal superantigen-like protein 7 |                         |                          |       | Staphylococcal<br>superantigen-<br>like<br>protein 8 | Staphylococcal superantigen-like protein 9 |            | Staphylococcal superantigen-like protein 10 |                         |                     | Staphylococcal superantigen-like protein 11 |                                 |                         |
| V40-124624                              | NEG                                                                      | NEG                                 | POS                                        | NEG                                 | NEG                                        | POS                                 | NEG                     | NEG                                        | NEG                         | NEG                                        | POS                     | AMB                      | NEG   | POS                                                  | NEG                                        | NEG        | AMB                                         | POS                     | NEG                 | NEG                                         | NEG                             | NEG                     |
| V40-124624: in silico prediction        | POS                                                                      | NEG                                 | POS                                        | NEG                                 | NEG                                        | POS                                 | NEG                     | NEG                                        | NEG                         | NEG                                        | POS                     | NEG                      | NEG   | POS                                                  | NEG                                        | NEG        | NEG                                         | AMB                     | NEG                 | NEG                                         | NEG                             | NEG                     |
| SA-120: in silico prediction            | POS                                                                      | NEG                                 | POS                                        | NEG                                 | NEG                                        | POS                                 | NEG                     | NEG                                        | NEG                         | NEG                                        | POS                     | NEG                      | NEG   | POS                                                  | POS                                        | NEG        | NEG                                         | AMB                     | NEG                 | NEG                                         | NEG                             | NEG                     |
| 61908: in silico prediction             | POS                                                                      | NEG                                 | POS                                        | NEG                                 | NEG                                        | POS                                 | NEG                     | NEG                                        | NEG                         | NEG                                        | POS                     | NEG                      | NEG   | POS                                                  | POS                                        | NEG        | NEG                                         | AMB                     | NEG                 | NEG                                         | NEG                             | NEG                     |
| M1790_98_1: in silico prediction        | POS                                                                      | NEG                                 | POS                                        | NEG                                 | NEG                                        | POS                                 | NEG                     | NEG                                        | NEG                         | NEG                                        | POS                     | NEG                      | NEG   | POS                                                  | POS                                        | NEG        | NEG                                         | AMB                     | NEG                 | NEG                                         | NEG                             | NEG                     |
| GKP138-13: in silico prediction         | POS                                                                      | NEG                                 | POS                                        | NEG                                 | NEG                                        | POS                                 | NEG                     | NEG                                        | NEG                         | NEG                                        | POS                     | NEG                      | NEG   | POS                                                  | POS                                        | NEG        | NEG                                         | AMB                     | NEG                 | NEG                                         | NEG                             | NEG                     |
| GKP138-2: in silico prediction          | POS                                                                      | NEG                                 | POS                                        | NEG                                 | NEG                                        | POS                                 | NEG                     | NEG                                        | NEG                         | NEG                                        | POS                     | NEG                      | NEG   | POS                                                  | POS                                        | NEG        | NEG                                         | AMB                     | NEG                 | NEG                                         | NEG                             | NEG                     |
| GKP138-31: in silico prediction         | POS                                                                      | NEG                                 | POS                                        | NEG                                 | NEG                                        | POS                                 | NEG                     | NEG                                        | NEG                         | NEG                                        | POS                     | NEG                      | NEG   | POS                                                  | POS                                        | NEG        | NEG                                         | AMB                     | NEG                 | NEG                                         | NEG                             | NEG                     |
| GKP138-33: in silico prediction         | POS                                                                      | NEG                                 | POS                                        | NEG                                 | NEG                                        | POS                                 | NEG                     | NEG                                        | NEG                         | NEG                                        | POS                     | NEG                      | NEG   | POS                                                  | POS                                        | NEG        | NEG                                         | AMB                     | NEG                 | NEG                                         | NEG                             | NEG                     |
| GKP138-52: in silico prediction         | POS                                                                      | NEG                                 | POS                                        | NEG                                 | NEG                                        | POS                                 | NEG                     | NEG                                        | NEG                         | NEG                                        | POS                     | NEG                      | NEG   | POS                                                  | POS                                        | NEG        | NEG                                         | AMB                     | NEG                 | NEG                                         | NEG                             | NEG                     |
| GKP138-78: in silico prediction         | POS                                                                      | NEG                                 | POS                                        | NEG                                 | NEG                                        | POS                                 | NEG                     | NEG                                        | NEG                         | NEG                                        | POS                     | NEG                      | NEG   | POS                                                  | POS                                        | NEG        | NEG                                         | AMB                     | NEG                 | NEG                                         | NEG                             | NEG                     |
| GKP136-4: in silico prediction          | POS                                                                      | NEG                                 | POS                                        | NEG                                 | NEG                                        | POS                                 | NEG                     | NEG                                        | NEG                         | NEG                                        | POS                     | NEG                      | NEG   | POS                                                  | POS                                        | NEG        | NEG                                         | AMB                     | NEG                 | NEG                                         | NEG                             | NEG                     |
| ZTA09_03668_9_HSA: in silico prediction | POS                                                                      | NEG                                 | POS                                        | NEG                                 | NEG                                        | POS                                 | NEG                     | NEG                                        | NEG                         | NEG                                        | POS                     | NEG                      | NEG   | POS                                                  | POS                                        | NEG        | NEG                                         | AMB                     | NEG                 | NEG                                         | NEG                             | NEG                     |
| GKP136-58: in silico prediction         | POS                                                                      | NEG                                 | POS                                        | NEG                                 | NEG                                        | POS                                 | NEG                     | NEG                                        | NEG                         | NEG                                        | POS                     | NEG                      | NEG   | POS                                                  | POS                                        | NEG        | NEG                                         | AMB                     | NEG                 | NEG                                         | NEG                             | NEG                     |
| 004_0004_23k: in silico prediction      | POS                                                                      | NEG                                 | POS                                        | NEG                                 | NEG                                        | POS                                 | NEG                     | NEG                                        | NEG                         | NEG                                        | POS                     | NEG                      | NEG   | POS                                                  | POS                                        | NEG        | NEG                                         | AMB                     | NEG                 | NEG                                         | NEG                             | NEG                     |
| BA06_02038: in silico prediction        | POS                                                                      | NEG                                 | POS                                        | NEG                                 | NEG                                        | POS                                 | NEG                     | NEG                                        | NEG                         | NEG                                        | POS                     | NEG                      | NEG   | POS                                                  | POS                                        | NEG        | NEG                                         | AMB                     | NEG                 | NEG                                         | NEG                             | NEG                     |
| GKP138-4: in silico prediction          | POS                                                                      | NEG                                 | POS                                        | NEG                                 | NEG                                        | POS                                 | NEG                     | NEG                                        | NEG                         | NEG                                        | POS                     | NEG                      | NEG   | POS                                                  | POS                                        | NEG        | NEG                                         | AMB                     | NEG                 | NEG                                         | NEG                             | NEG                     |
| ZTA10_02421_9_HSA: in silico prediction | POS                                                                      | NEG                                 | POS                                        | NEG                                 | NEG                                        | POS                                 | NEG                     | NEG                                        | NEG                         | NEG                                        | POS                     | NEG                      | NEG   | POS                                                  | POS                                        | NEG        | NEG                                         | AMB                     | NEG                 | NEG                                         | NEG                             | NEG                     |
| GKP136-62: in silico prediction         | POS                                                                      | NEG                                 | POS                                        | NEG                                 | NEG                                        | POS                                 | NEG                     | NEG                                        | NEG                         | NEG                                        | POS                     | NEG                      | NEG   | POS                                                  | POS                                        | NEG        | NEG                                         | AMB                     | NEG                 | NEG                                         | NEG                             | NEG                     |
| LGA251: in silico prediction            | POS                                                                      | NEG                                 | POS                                        | NEG                                 | NEG                                        | POS                                 | NEG                     | NEG                                        | NEG                         | NEG                                        | POS                     | NEG                      | NEG   | POS                                                  | POS                                        | NEG        | NEG                                         | AMB                     | NEG                 | NEG                                         | NEG                             | NEG                     |
| UK_NCTC13552: in silico prediction      | POS                                                                      | NEG                                 | POS                                        | NEG                                 | NEG                                        | POS                                 | NEG                     | NEG                                        | NEG                         | NEG                                        | POS                     | NEG                      | NEG   | POS                                                  | POS                                        | NEG        | NEG                                         | AMB                     | NEG                 | NEG                                         | NEG                             | NEG                     |
| GKP138-71: in silico prediction         | POS                                                                      | NEG                                 | POS                                        | NEG                                 | NEG                                        | POS                                 | NEG                     | NEG                                        | NEG                         | NEG                                        | POS                     | NEG                      | NEG   | POS                                                  | POS                                        | NEG        | NEG                                         | AMB                     | NEG                 | NEG                                         | NEG                             | NEG                     |
| cat-mandible-2013: in silico prediction | POS                                                                      | NEG                                 | POS                                        | NEG                                 | NEG                                        | POS                                 | NEG                     | NEG                                        | NEG                         | NEG                                        | POS                     | NEG                      | NEG   | POS                                                  | POS                                        | NEG        | NEG                                         | AMB                     | NEG                 | NEG                                         | NEG                             | NEG                     |
| 10_7350_D: in silico prediction         | POS                                                                      | NEG                                 | POS                                        | NEG                                 | NEG                                        | POS                                 | NEG                     | NEG                                        | NEG                         | NEG                                        | POS                     | NEG                      | NEG   | POS                                                  | POS                                        | NEG        | NEG                                         | AMB                     | NEG                 | NEG                                         | NEG                             | NEG                     |
| H114440275_A: in silico prediction      | POS                                                                      | NEG                                 | POS                                        | NEG                                 | NEG                                        | POS                                 | NEG                     | NEG                                        | NEG                         | NEG                                        | POS                     | NEG                      | NEG   | POS                                                  | POS                                        | NEG        | NEG                                         | AMB                     | NEG                 | NEG                                         | NEG                             | NEG                     |



| STRAIN / ISOLATE                                   | VIRULENCE : SET/SSL GENES |                    |       |                    |                                           |                      |                                              |                                          |                      |                                              |                                          |                                              |                      |                                              |                                  |                                  |                                 |                                               |     |
|----------------------------------------------------|---------------------------|--------------------|-------|--------------------|-------------------------------------------|----------------------|----------------------------------------------|------------------------------------------|----------------------|----------------------------------------------|------------------------------------------|----------------------------------------------|----------------------|----------------------------------------------|----------------------------------|----------------------------------|---------------------------------|-----------------------------------------------|-----|
|                                                    | setB3                     |                    | setB2 |                    | setB1                                     | Capsule type 1       |                                              |                                          | Capsule type 5       |                                              |                                          | Capsule type 8                               |                      |                                              |                                  | icaA                             | icaC                            | icaD                                          | bap |
|                                                    | setB3                     | setB3<br>(MRSA252) | setB2 | setB2<br>(MRSA252) |                                           | capH1                | capJ1                                        | capK1                                    | capH5                | capJ5                                        | capK5                                    | capH8                                        | capI8                | capJ8                                        | capK8                            |                                  |                                 |                                               |     |
|                                                    |                           |                    |       |                    |                                           |                      |                                              |                                          |                      |                                              |                                          |                                              |                      |                                              |                                  |                                  |                                 |                                               |     |
| Staphylococcus exotoxin-like protein, second locus |                           |                    |       |                    | capsular poly-saccharide synthesis enzyme | O-antigen polymerase | capsular polysaccharide biosynthesis protein | capsular polysaccharide synthesis enzyme | O-antigen polymerase | capsular polysaccharide biosynthesis protein | capsular polysaccharide synthesis enzyme | capsular polysaccharide biosynthesis protein | O-antigen polymerase | capsular polysaccharide biosynthesis protein | intercellular adhesion protein A | intercellular adhesion protein C | biofilm PIA synthesis protein D | Surface protein involved in biofilm formation |     |
| V40-124624                                         | POS                       | NEG                | POS   | NEG                | POS                                       | NEG                  | NEG                                          | NEG                                      | POS                  | POS                                          | POS                                      | NEG                                          | NEG                  | NEG                                          | NEG                              | POS                              | POS                             | POS                                           | NEG |
| V40-124624: in silico prediction                   | POS                       | NEG                | POS   | NEG                | POS                                       | NEG                  | NEG                                          | NEG                                      | POS                  | POS                                          | POS                                      | NEG                                          | NEG                  | NEG                                          | NEG                              | POS                              | POS                             | POS                                           | NEG |
| SA-120: in silico prediction                       | POS                       | NEG                | POS   | NEG                | POS                                       | NEG                  | NEG                                          | NEG                                      | POS                  | POS                                          | POS                                      | NEG                                          | NEG                  | NEG                                          | NEG                              | POS                              | POS                             | POS                                           | NEG |
| 61908: in silico prediction                        | POS                       | NEG                | POS   | NEG                | POS                                       | NEG                  | NEG                                          | NEG                                      | POS                  | POS                                          | POS                                      | NEG                                          | NEG                  | NEG                                          | NEG                              | POS                              | POS                             | POS                                           | NEG |
| M1790_98_1: in silico prediction                   | POS                       | NEG                | POS   | NEG                | POS                                       | NEG                  | NEG                                          | NEG                                      | POS                  | POS                                          | POS                                      | NEG                                          | NEG                  | NEG                                          | NEG                              | POS                              | POS                             | POS                                           | NEG |
| GKP138-13: in silico prediction                    | POS                       | NEG                | POS   | NEG                | POS                                       | NEG                  | NEG                                          | NEG                                      | POS                  | POS                                          | POS                                      | NEG                                          | NEG                  | NEG                                          | NEG                              | POS                              | POS                             | POS                                           | NEG |
| GKP138-2: in silico prediction                     | NEG                       | NEG                | NEG   | NEG                | NEG                                       | NEG                  | NEG                                          | NEG                                      | POS                  | POS                                          | POS                                      | NEG                                          | NEG                  | NEG                                          | NEG                              | POS                              | POS                             | POS                                           | NEG |
| GKP138-31: in silico prediction                    | POS                       | NEG                | POS   | NEG                | POS                                       | NEG                  | NEG                                          | NEG                                      | POS                  | POS                                          | POS                                      | NEG                                          | NEG                  | NEG                                          | NEG                              | POS                              | POS                             | POS                                           | NEG |
| GKP138-33: in silico prediction                    | POS                       | NEG                | POS   | NEG                | POS                                       | NEG                  | NEG                                          | NEG                                      | POS                  | POS                                          | POS                                      | NEG                                          | NEG                  | NEG                                          | NEG                              | POS                              | POS                             | POS                                           | NEG |
| GKP138-52: in silico prediction                    | POS                       | NEG                | POS   | NEG                | POS                                       | NEG                  | NEG                                          | NEG                                      | POS                  | POS                                          | POS                                      | NEG                                          | NEG                  | NEG                                          | NEG                              | POS                              | POS                             | POS                                           | NEG |
| GKP138-78: in silico prediction                    | POS                       | NEG                | POS   | NEG                | POS                                       | NEG                  | NEG                                          | NEG                                      | POS                  | POS                                          | POS                                      | NEG                                          | NEG                  | NEG                                          | NEG                              | POS                              | POS                             | POS                                           | NEG |
| GKP136-4: in silico prediction                     | POS                       | NEG                | POS   | NEG                | POS                                       | NEG                  | NEG                                          | NEG                                      | POS                  | POS                                          | POS                                      | NEG                                          | NEG                  | NEG                                          | NEG                              | POS                              | POS                             | POS                                           | NEG |
| ZTA09_03668_9_HSA: in silico prediction            | POS                       | NEG                | POS   | NEG                | POS                                       | NEG                  | NEG                                          | NEG                                      | POS                  | POS                                          | POS                                      | NEG                                          | NEG                  | NEG                                          | NEG                              | POS                              | POS                             | POS                                           | NEG |
| GKP136-58: in silico prediction                    | POS                       | NEG                | POS   | NEG                | POS                                       | NEG                  | NEG                                          | NEG                                      | POS                  | POS                                          | POS                                      | NEG                                          | NEG                  | NEG                                          | NEG                              | POS                              | POS                             | POS                                           | NEG |
| 004_0004_23k: in silico prediction                 | POS                       | NEG                | POS   | NEG                | POS                                       | NEG                  | NEG                                          | NEG                                      | POS                  | POS                                          | POS                                      | NEG                                          | NEG                  | NEG                                          | NEG                              | POS                              | POS                             | POS                                           | NEG |
| BA06_02038: in silico prediction                   | POS                       | NEG                | POS   | NEG                | POS                                       | NEG                  | NEG                                          | NEG                                      | POS                  | POS                                          | POS                                      | NEG                                          | NEG                  | NEG                                          | NEG                              | POS                              | POS                             | POS                                           | NEG |
| GKP138-4: in silico prediction                     | POS                       | NEG                | POS   | NEG                | POS                                       | NEG                  | NEG                                          | NEG                                      | POS                  | POS                                          | POS                                      | NEG                                          | NEG                  | NEG                                          | NEG                              | POS                              | POS                             | POS                                           | NEG |
| ZTA10_02421_9_HSA: in silico prediction            | POS                       | NEG                | POS   | NEG                | POS                                       | NEG                  | NEG                                          | NEG                                      | POS                  | POS                                          | POS                                      | NEG                                          | NEG                  | NEG                                          | NEG                              | POS                              | POS                             | POS                                           | NEG |
| GKP136-62: in silico prediction                    | POS                       | NEG                | POS   | NEG                | POS                                       | NEG                  | NEG                                          | NEG                                      | POS                  | POS                                          | POS                                      | NEG                                          | NEG                  | NEG                                          | NEG                              | POS                              | POS                             | POS                                           | NEG |
| LGA251: in silico prediction                       | POS                       | NEG                | POS   | NEG                | POS                                       | NEG                  | NEG                                          | NEG                                      | POS                  | POS                                          | POS                                      | NEG                                          | NEG                  | NEG                                          | NEG                              | POS                              | POS                             | POS                                           | NEG |
| UK_NCTC13552: in silico prediction                 | POS                       | NEG                | POS   | NEG                | POS                                       | NEG                  | NEG                                          | NEG                                      | POS                  | POS                                          | POS                                      | NEG                                          | NEG                  | NEG                                          | NEG                              | POS                              | POS                             | POS                                           | NEG |
| GKP138-71: in silico prediction                    | POS                       | NEG                | POS   | NEG                | POS                                       | NEG                  | NEG                                          | NEG                                      | POS                  | POS                                          | POS                                      | NEG                                          | NEG                  | NEG                                          | NEG                              | POS                              | POS                             | POS                                           | NEG |
| cat-mandible-2013: in silico prediction            | POS                       | NEG                | POS   | NEG                | POS                                       | NEG                  | NEG                                          | NEG                                      | POS                  | POS                                          | POS                                      | NEG                                          | NEG                  | NEG                                          | NEG                              | POS                              | POS                             | POS                                           | NEG |
| 10_7350_D: in silico prediction                    | POS                       | NEG                | POS   | NEG                | POS                                       | NEG                  | NEG                                          | NEG                                      | POS                  | POS                                          | POS                                      | NEG                                          | NEG                  | NEG                                          | NEG                              | POS                              | POS                             | POS                                           | NEG |
| H114440275_A: in silico prediction                 | POS                       | NEG                | POS   | NEG                | POS                                       | NEG                  | NEG                                          | NEG                                      | POS                  | POS                                          | POS                                      | NEG                                          | NEG                  | NEG                                          | NEG                              | POS                              | POS                             | POS                                           | NEG |

| STRAIN / ISOLATE                        | ADHAESION FACTORS / GENES ENCODING MICROBIAL SURFACE COMPONENTS RECOGNIZING ADHESIVE MATRIX MOLECULES (MSCRAMM GENES) |            |               |               |            |             |                   |      |             |                  |                |                   |      |             |                 |            |                           |              |
|-----------------------------------------|-----------------------------------------------------------------------------------------------------------------------|------------|---------------|---------------|------------|-------------|-------------------|------|-------------|------------------|----------------|-------------------|------|-------------|-----------------|------------|---------------------------|--------------|
|                                         | bbp                                                                                                                   |            |               |               |            |             | clfA              |      |             |                  |                | clfB              |      |             |                 |            | cna                       |              |
|                                         | bbp                                                                                                                   | bbp (cons) | bbp (COL+MW2) | bbp (MRSa252) | bbp (Mu50) | bbp (RF122) | bbp (ST45)        | clfA | clfA (cons) | clfA (COL+RF122) | clfA (MRSa252) | clfA (Mu50+MW2)   | clfB | clfB (cons) | clfB (COL+Mu50) | clfB (MW2) |                           | clfB (RF122) |
|                                         |                                                                                                                       |            |               |               |            |             |                   |      |             |                  |                |                   |      |             |                 |            |                           |              |
| Bone sialoprotein-binding protein       |                                                                                                                       |            |               |               |            |             | Clumping factor A |      |             |                  |                | Clumping factor B |      |             |                 |            | Collagen-binding adhesion |              |
| V40-124624                              | POS                                                                                                                   | POS        | NEG           | NEG           | NEG        | NEG         | NEG               | POS  | POS         | NEG              | NEG            | POS               | POS  | POS         | NEG             | NEG        | AMB                       | NEG          |
| V40-124624: in silico prediction        | POS                                                                                                                   | POS        | NEG           | NEG           | NEG        | NEG         | NEG               | POS  | POS         | NEG              | NEG            | POS               | POS  | POS         | NEG             | NEG        | NEG                       | AMB          |
| SA-120: in silico prediction            | POS                                                                                                                   | POS        | NEG           | NEG           | NEG        | NEG         | NEG               | POS  | POS         | NEG              | NEG            | POS               | POS  | POS         | NEG             | NEG        | NEG                       | AMB          |
| 61908: in silico prediction             | POS                                                                                                                   | POS        | NEG           | NEG           | NEG        | NEG         | NEG               | POS  | POS         | NEG              | NEG            | POS               | POS  | POS         | NEG             | NEG        | NEG                       | AMB          |
| M1790_98_1: in silico prediction        | POS                                                                                                                   | POS        | NEG           | NEG           | NEG        | NEG         | NEG               | POS  | POS         | NEG              | NEG            | POS               | POS  | POS         | NEG             | NEG        | NEG                       | AMB          |
| GKP138-13: in silico prediction         | POS                                                                                                                   | POS        | NEG           | NEG           | NEG        | NEG         | NEG               | POS  | POS         | NEG              | NEG            | POS               | POS  | POS         | NEG             | NEG        | NEG                       | AMB          |
| GKP138-2: in silico prediction          | POS                                                                                                                   | POS        | NEG           | NEG           | NEG        | NEG         | NEG               | POS  | POS         | NEG              | NEG            | POS               | POS  | POS         | NEG             | NEG        | NEG                       | AMB          |
| GKP138-31: in silico prediction         | POS                                                                                                                   | POS        | NEG           | NEG           | NEG        | NEG         | NEG               | POS  | POS         | NEG              | NEG            | POS               | POS  | POS         | NEG             | NEG        | NEG                       | AMB          |
| GKP138-33: in silico prediction         | POS                                                                                                                   | POS        | NEG           | NEG           | NEG        | NEG         | NEG               | POS  | POS         | NEG              | NEG            | POS               | POS  | POS         | NEG             | NEG        | NEG                       | AMB          |
| GKP138-52: in silico prediction         | POS                                                                                                                   | POS        | NEG           | NEG           | NEG        | NEG         | NEG               | POS  | POS         | NEG              | NEG            | POS               | POS  | POS         | NEG             | NEG        | NEG                       | AMB          |
| GKP138-78: in silico prediction         | POS                                                                                                                   | POS        | NEG           | NEG           | NEG        | NEG         | NEG               | POS  | POS         | NEG              | NEG            | POS               | POS  | POS         | NEG             | NEG        | NEG                       | AMB          |
| GKP136-4: in silico prediction          | POS                                                                                                                   | POS        | NEG           | NEG           | NEG        | NEG         | NEG               | POS  | POS         | NEG              | NEG            | POS               | POS  | POS         | NEG             | NEG        | NEG                       | AMB          |
| ZTA09_03668_9_HSA: in silico prediction | POS                                                                                                                   | POS        | NEG           | NEG           | NEG        | NEG         | NEG               | POS  | POS         | NEG              | NEG            | POS               | POS  | POS         | NEG             | NEG        | NEG                       | AMB          |
| GKP136-58: in silico prediction         | POS                                                                                                                   | POS        | NEG           | NEG           | NEG        | NEG         | NEG               | POS  | POS         | NEG              | NEG            | POS               | POS  | POS         | NEG             | NEG        | NEG                       | AMB          |
| 004_0004_23k: in silico prediction      | POS                                                                                                                   | POS        | NEG           | NEG           | NEG        | NEG         | NEG               | POS  | POS         | NEG              | NEG            | POS               | POS  | POS         | NEG             | NEG        | NEG                       | AMB          |
| BA06_02038: in silico prediction        | POS                                                                                                                   | POS        | NEG           | NEG           | NEG        | NEG         | NEG               | POS  | POS         | NEG              | NEG            | POS               | POS  | POS         | NEG             | NEG        | NEG                       | AMB          |
| GKP138-4: in silico prediction          | POS                                                                                                                   | POS        | NEG           | NEG           | NEG        | NEG         | NEG               | POS  | POS         | NEG              | NEG            | POS               | POS  | POS         | NEG             | NEG        | NEG                       | AMB          |
| ZTA10_02421_9_HSA: in silico prediction | POS                                                                                                                   | POS        | NEG           | NEG           | NEG        | NEG         | NEG               | POS  | POS         | NEG              | NEG            | POS               | POS  | POS         | NEG             | NEG        | NEG                       | AMB          |
| GKP136-62: in silico prediction         | POS                                                                                                                   | POS        | NEG           | NEG           | NEG        | NEG         | NEG               | POS  | POS         | NEG              | NEG            | POS               | POS  | POS         | NEG             | NEG        | NEG                       | AMB          |
| LGA251: in silico prediction            | POS                                                                                                                   | POS        | NEG           | NEG           | NEG        | NEG         | NEG               | POS  | POS         | NEG              | NEG            | POS               | POS  | POS         | NEG             | NEG        | NEG                       | AMB          |
| UK_NCTC13552: in silico prediction      | POS                                                                                                                   | POS        | NEG           | NEG           | NEG        | NEG         | NEG               | POS  | POS         | NEG              | NEG            | POS               | POS  | POS         | NEG             | NEG        | NEG                       | AMB          |
| GKP138-74: in silico prediction         | POS                                                                                                                   | POS        | NEG           | NEG           | NEG        | NEG         | NEG               | POS  | POS         | NEG              | NEG            | POS               | POS  | POS         | NEG             | NEG        | NEG                       | AMB          |
| cat-mandible-2013: in silico prediction | POS                                                                                                                   | POS        | NEG           | NEG           | NEG        | NEG         | NEG               | POS  | POS         | NEG              | NEG            | POS               | POS  | POS         | NEG             | NEG        | NEG                       | AMB          |
| 10_7350_D: in silico prediction         | POS                                                                                                                   | POS        | NEG           | NEG           | NEG        | NEG         | NEG               | POS  | POS         | NEG              | NEG            | POS               | POS  | POS         | NEG             | NEG        | NEG                       | AMB          |
| H114440275_A: in silico prediction      | POS                                                                                                                   | POS        | NEG           | NEG           | NEG        | NEG         | NEG               | POS  | POS         | NEG              | NEG            | POS               | POS  | POS         | NEG             | NEG        | NEG                       | AMB          |

| STRAIN / ISOLATE                        | ADHAESION FACTORS / GENES ENCODING MICROBIAL SURFACE COMPONENTS RECOGNIZING ADHESIVE MATRIX MOLECULES (MSCRAMM GENES) |                                      |                |                |                |            |         |                                     |                     |                               |             |            |                |                 |              |
|-----------------------------------------|-----------------------------------------------------------------------------------------------------------------------|--------------------------------------|----------------|----------------|----------------|------------|---------|-------------------------------------|---------------------|-------------------------------|-------------|------------|----------------|-----------------|--------------|
|                                         | ebh                                                                                                                   | ebp5                                 |                |                |                |            | eno     | efb                                 |                     | fnbA                          |             |            |                |                 |              |
|                                         | ebh (cons)                                                                                                            | ebp5                                 | ebp5_probe 612 | ebp5_probe 614 | ebp5 (01-1111) | ebp5 (COL) |         | efb / fib                           | efb / fib (MRSA252) | fnbA                          | fnbA (cons) | fnbA (COL) | fnbA (MRSA252) | fnbA (Mu50+MW2) | fnbA (RF122) |
|                                         | Cell wall associated fibronectin-binding protein                                                                      | cell surface elastin binding protein |                |                |                |            | enolase | fibrinogen binding protein (19 kDa) |                     | fibronectin-binding protein A |             |            |                |                 |              |
| V40-124624                              | POS                                                                                                                   | POS                                  | NEG            | POS            | POS            | NEG        | POS     | POS                                 | NEG                 | POS                           | POS         | NEG        | NEG            | NEG             | NEG          |
| V40-124624: in silico prediction        | POS                                                                                                                   | POS                                  | NEG            | POS            | POS            | NEG        | POS     | POS                                 | NEG                 | POS                           | POS         | NEG        | NEG            | NEG             | NEG          |
| SA-120: in silico prediction            | POS                                                                                                                   | POS                                  | NEG            | POS            | POS            | NEG        | POS     | POS                                 | NEG                 | POS                           | POS         | NEG        | NEG            | NEG             | NEG          |
| 61908: in silico prediction             | POS                                                                                                                   | POS                                  | NEG            | POS            | POS            | NEG        | POS     | POS                                 | NEG                 | POS                           | POS         | NEG        | NEG            | NEG             | NEG          |
| M1790_98_1: in silico prediction        | POS                                                                                                                   | POS                                  | NEG            | POS            | POS            | NEG        | POS     | POS                                 | NEG                 | POS                           | POS         | NEG        | NEG            | NEG             | NEG          |
| GKP138-13: in silico prediction         | POS                                                                                                                   | POS                                  | NEG            | POS            | POS            | NEG        | POS     | POS                                 | NEG                 | POS                           | POS         | NEG        | NEG            | NEG             | NEG          |
| GKP138-2: in silico prediction          | POS                                                                                                                   | POS                                  | NEG            | POS            | POS            | NEG        | POS     | POS                                 | NEG                 | POS                           | POS         | NEG        | NEG            | NEG             | NEG          |
| GKP138-31: in silico prediction         | POS                                                                                                                   | POS                                  | NEG            | POS            | POS            | NEG        | POS     | POS                                 | NEG                 | POS                           | POS         | NEG        | NEG            | NEG             | NEG          |
| GKP138-33: in silico prediction         | POS                                                                                                                   | POS                                  | NEG            | POS            | POS            | NEG        | POS     | POS                                 | NEG                 | POS                           | POS         | NEG        | NEG            | NEG             | NEG          |
| GKP138-52: in silico prediction         | POS                                                                                                                   | POS                                  | NEG            | POS            | POS            | NEG        | POS     | POS                                 | NEG                 | POS                           | POS         | NEG        | NEG            | NEG             | NEG          |
| GKP138-78: in silico prediction         | POS                                                                                                                   | POS                                  | NEG            | POS            | POS            | NEG        | POS     | POS                                 | NEG                 | POS                           | POS         | NEG        | NEG            | NEG             | NEG          |
| GKP136-4: in silico prediction          | POS                                                                                                                   | POS                                  | NEG            | POS            | POS            | NEG        | POS     | POS                                 | NEG                 | POS                           | POS         | NEG        | NEG            | NEG             | NEG          |
| ZTA09_03668_9_HSA: in silico prediction | POS                                                                                                                   | POS                                  | NEG            | POS            | POS            | NEG        | POS     | POS                                 | NEG                 | POS                           | POS         | NEG        | NEG            | NEG             | NEG          |
| GKP136-58: in silico prediction         | POS                                                                                                                   | POS                                  | NEG            | POS            | POS            | NEG        | POS     | POS                                 | NEG                 | POS                           | POS         | NEG        | NEG            | NEG             | NEG          |
| 004_0004_23k: in silico prediction      | POS                                                                                                                   | POS                                  | NEG            | POS            | POS            | NEG        | POS     | POS                                 | NEG                 | POS                           | POS         | NEG        | NEG            | NEG             | NEG          |
| BA06_02038: in silico prediction        | POS                                                                                                                   | POS                                  | NEG            | POS            | POS            | NEG        | POS     | POS                                 | NEG                 | POS                           | POS         | NEG        | NEG            | NEG             | NEG          |
| GKP138-4: in silico prediction          | POS                                                                                                                   | POS                                  | NEG            | POS            | POS            | NEG        | POS     | POS                                 | NEG                 | POS                           | POS         | NEG        | NEG            | NEG             | NEG          |
| ZTA10_02421_9_HSA: in silico prediction | POS                                                                                                                   | POS                                  | NEG            | POS            | POS            | NEG        | POS     | POS                                 | NEG                 | POS                           | POS         | NEG        | NEG            | NEG             | NEG          |
| GKP136-62: in silico prediction         | POS                                                                                                                   | POS                                  | NEG            | POS            | POS            | NEG        | POS     | POS                                 | NEG                 | POS                           | POS         | NEG        | NEG            | NEG             | NEG          |
| LGA251: in silico prediction            | POS                                                                                                                   | POS                                  | NEG            | POS            | POS            | NEG        | POS     | POS                                 | NEG                 | POS                           | POS         | NEG        | NEG            | NEG             | NEG          |
| UK_NCTC13552: in silico prediction      | POS                                                                                                                   | POS                                  | NEG            | POS            | POS            | NEG        | POS     | POS                                 | NEG                 | POS                           | POS         | NEG        | NEG            | NEG             | NEG          |
| GKP138-71: in silico prediction         | POS                                                                                                                   | POS                                  | NEG            | POS            | POS            | NEG        | POS     | POS                                 | NEG                 | POS                           | POS         | NEG        | NEG            | NEG             | NEG          |
| cat-mandible-2013: in silico prediction | POS                                                                                                                   | POS                                  | NEG            | POS            | POS            | NEG        | POS     | POS                                 | NEG                 | POS                           | POS         | NEG        | NEG            | NEG             | NEG          |
| 10_7350_D: in silico prediction         | POS                                                                                                                   | POS                                  | NEG            | POS            | POS            | NEG        | POS     | POS                                 | NEG                 | POS                           | POS         | NEG        | NEG            | NEG             | NEG          |
| H114440275_A: in silico prediction      | POS                                                                                                                   | POS                                  | NEG            | POS            | POS            | NEG        | POS     | POS                                 | NEG                 | POS                           | POS         | NEG        | NEG            | NEG             | NEG          |

| STRAIN / ISOLATE                        | ADHAESION FACTORS / GENES ENCODING MICROBIAL SURFACE COMPONENTS RECOGNIZING ADHESIVE MATRIX MOLECULES (MSCRAMM GENES) |            |                     |             |            |             |                                                                                                   |     |           |               |                                         |      |                 |            |             |                        |
|-----------------------------------------|-----------------------------------------------------------------------------------------------------------------------|------------|---------------------|-------------|------------|-------------|---------------------------------------------------------------------------------------------------|-----|-----------|---------------|-----------------------------------------|------|-----------------|------------|-------------|------------------------|
|                                         | fnbB                                                                                                                  |            |                     |             |            |             | map                                                                                               |     |           |               | sasG                                    |      |                 |            | sasX / sesI |                        |
|                                         | fnbB                                                                                                                  | fnbB (COL) | fnbB (COL+Mu50+MW2) | fnbB (Mu50) | fnbB (MW2) | fnbB (ST15) | fnbB (ST45-2)                                                                                     | map | map (COL) | map (MRSA252) | map (Mu50+MW2)                          | sasG | sasG (COL+Mu50) | sasG (MW2) |             | sasG (OtherThan25+122) |
|                                         | Fibronectin-binding protein B                                                                                         |            |                     |             |            |             | Major histocompatibility complex class II analog protein (i-Extracellular adherence protein, eap) |     |           |               | Staphylococcus aureus surface protein G |      |                 |            |             |                        |
| V40-124624                              | POS                                                                                                                   | NEG        | POS                 | AMB         | NEG        | NEG         | NEG                                                                                               | POS | POS       | NEG           | NEG                                     | NEG  | NEG             | NEG        | NEG         | NEG                    |
| V40-124624: in silico prediction        | POS                                                                                                                   | NEG        | AMB                 | AMB         | NEG        | NEG         | NEG                                                                                               | POS | POS       | NEG           | NEG                                     | NEG  | NEG             | NEG        | NEG         | NEG                    |
| SA-120: in silico prediction            | NEG                                                                                                                   | NEG        | NEG                 | NEG         | NEG        | NEG         | NEG                                                                                               | POS | POS       | NEG           | NEG                                     | NEG  | NEG             | NEG        | NEG         | NEG                    |
| E1908: in silico prediction             | NEG                                                                                                                   | NEG        | NEG                 | NEG         | NEG        | NEG         | NEG                                                                                               | POS | POS       | NEG           | NEG                                     | NEG  | NEG             | NEG        | NEG         | NEG                    |
| M1790_98_1: in silico prediction        | POS                                                                                                                   | NEG        | AMB                 | AMB         | NEG        | NEG         | NEG                                                                                               | POS | POS       | NEG           | NEG                                     | NEG  | NEG             | NEG        | NEG         | NEG                    |
| GKPl38-13: in silico prediction         | POS                                                                                                                   | NEG        | AMB                 | AMB         | NEG        | NEG         | NEG                                                                                               | POS | POS       | NEG           | NEG                                     | NEG  | NEG             | NEG        | NEG         | NEG                    |
| GKPl38-2: in silico prediction          | POS                                                                                                                   | NEG        | AMB                 | AMB         | NEG        | NEG         | NEG                                                                                               | POS | POS       | NEG           | AMB                                     | NEG  | NEG             | NEG        | NEG         | NEG                    |
| GKPl38-31: in silico prediction         | POS                                                                                                                   | NEG        | AMB                 | AMB         | NEG        | NEG         | NEG                                                                                               | POS | POS       | NEG           | NEG                                     | NEG  | NEG             | NEG        | NEG         | NEG                    |
| GKPl38-33: in silico prediction         | POS                                                                                                                   | NEG        | AMB                 | AMB         | NEG        | NEG         | NEG                                                                                               | POS | POS       | NEG           | NEG                                     | NEG  | NEG             | NEG        | NEG         | NEG                    |
| GKPl38-52: in silico prediction         | POS                                                                                                                   | NEG        | AMB                 | AMB         | NEG        | NEG         | NEG                                                                                               | POS | POS       | NEG           | NEG                                     | NEG  | NEG             | NEG        | NEG         | NEG                    |
| GKPl38-78: in silico prediction         | POS                                                                                                                   | NEG        | AMB                 | AMB         | NEG        | NEG         | NEG                                                                                               | POS | POS       | NEG           | NEG                                     | NEG  | NEG             | NEG        | NEG         | NEG                    |
| GKPl36-4: in silico prediction          | NEG                                                                                                                   | NEG        | NEG                 | NEG         | NEG        | NEG         | NEG                                                                                               | POS | POS       | NEG           | NEG                                     | NEG  | NEG             | NEG        | NEG         | NEG                    |
| ZTA09_03668_9_HSA: in silico prediction | POS                                                                                                                   | NEG        | AMB                 | AMB         | NEG        | NEG         | NEG                                                                                               | POS | POS       | NEG           | NEG                                     | NEG  | NEG             | NEG        | NEG         | NEG                    |
| GKPl36-58: in silico prediction         | POS                                                                                                                   | NEG        | AMB                 | AMB         | NEG        | NEG         | NEG                                                                                               | POS | POS       | NEG           | NEG                                     | NEG  | NEG             | NEG        | NEG         | NEG                    |
| 004_0004_23k: in silico prediction      | POS                                                                                                                   | NEG        | AMB                 | AMB         | NEG        | NEG         | NEG                                                                                               | POS | POS       | NEG           | NEG                                     | NEG  | NEG             | NEG        | NEG         | NEG                    |
| BA06_02038: in silico prediction        | POS                                                                                                                   | NEG        | AMB                 | AMB         | NEG        | NEG         | NEG                                                                                               | POS | POS       | NEG           | AMB                                     | NEG  | NEG             | NEG        | NEG         | NEG                    |
| GKPl38-4: in silico prediction          | POS                                                                                                                   | NEG        | AMB                 | AMB         | NEG        | NEG         | NEG                                                                                               | POS | POS       | NEG           | NEG                                     | NEG  | NEG             | NEG        | NEG         | NEG                    |
| ZTA10_02421_9_HSA: in silico prediction | POS                                                                                                                   | NEG        | AMB                 | AMB         | NEG        | NEG         | NEG                                                                                               | POS | POS       | NEG           | NEG                                     | NEG  | NEG             | NEG        | NEG         | NEG                    |
| GKPl36-62: in silico prediction         | POS                                                                                                                   | NEG        | AMB                 | AMB         | NEG        | NEG         | NEG                                                                                               | POS | POS       | NEG           | NEG                                     | NEG  | NEG             | NEG        | NEG         | NEG                    |
| LG6A251: in silico prediction           | POS                                                                                                                   | NEG        | AMB                 | AMB         | NEG        | NEG         | NEG                                                                                               | POS | POS       | NEG           | NEG                                     | NEG  | NEG             | NEG        | NEG         | NEG                    |
| UK_NCTC13552: in silico prediction      | POS                                                                                                                   | NEG        | AMB                 | AMB         | NEG        | NEG         | NEG                                                                                               | POS | POS       | NEG           | NEG                                     | NEG  | NEG             | NEG        | NEG         | NEG                    |
| GKPl38-71: in silico prediction         | POS                                                                                                                   | NEG        | AMB                 | AMB         | NEG        | NEG         | NEG                                                                                               | POS | POS       | NEG           | NEG                                     | NEG  | NEG             | NEG        | NEG         | NEG                    |
| ant-nr016b-2013: in silico prediction   | POS                                                                                                                   | NEG        | AMB                 | AMB         | NEG        | NEG         | NEG                                                                                               | POS | POS       | NEG           | NEG                                     | NEG  | NEG             | NEG        | NEG         | NEG                    |
| 10_Z550_D: in silico prediction         | NEG                                                                                                                   | NEG        | NEG                 | NEG         | NEG        | NEG         | NEG                                                                                               | POS | POS       | NEG           | NEG                                     | NEG  | NEG             | NEG        | NEG         | NEG                    |
| H114440275_A: in silico prediction      | POS                                                                                                                   | NEG        | AMB                 | AMB         | NEG        | NEG         | NEG                                                                                               | POS | POS       | NEG           | NEG                                     | NEG  | NEG             | NEG        | NEG         | NEG                    |

| STRAIN / ISOLATE                        | ADHAESION FACTORS / MSCRAMM GENES                            |           |            |             |                           |                            |                                                              |             |                |             |              |                                       |            |               |               |            |             |  |
|-----------------------------------------|--------------------------------------------------------------|-----------|------------|-------------|---------------------------|----------------------------|--------------------------------------------------------------|-------------|----------------|-------------|--------------|---------------------------------------|------------|---------------|---------------|------------|-------------|--|
|                                         | sdrC                                                         |           |            |             |                           |                            | sdrD                                                         |             |                |             |              | vwb                                   |            |               |               |            |             |  |
|                                         | sdrC                                                         | sdrC (B1) | sdrC (COL) | sdrC (Mu50) | sdrC (MW2+MRSA 252+RF122) | sdrC (OtherThan25 2+RF122) | sdrD                                                         | sdrD (cons) | sdrD (COL+MW2) | sdrD (Mu50) | sdrD (other) | vwb                                   | vwb (cons) | vwb (COL+MW2) | vwb (MRSA252) | vwb (Mu50) | vwb (RF122) |  |
|                                         | Ser-Asp rich fibrinogen /bone sialoprotein-binding protein C |           |            |             |                           |                            | Ser-Asp rich fibrinogen /bone sialoprotein-binding protein D |             |                |             |              | van Willebrand factor binding protein |            |               |               |            |             |  |
| V40-124624                              | POS                                                          | NEG       | NEG        | NEG         | NEG                       | NEG                        | POS                                                          | POS         | NEG            | NEG         | POS          | POS                                   | POS        | NEG           | NEG           | NEG        | NEG         |  |
| V40-124624: in silico prediction        | POS                                                          | NEG       | NEG        | NEG         | POS                       | NEG                        | POS                                                          | POS         | NEG            | NEG         | POS          | POS                                   | POS        | NEG           | NEG           | NEG        | NEG         |  |
| SA-120: in silico prediction            | POS                                                          | NEG       | NEG        | NEG         | POS                       | NEG                        | POS                                                          | POS         | NEG            | NEG         | POS          | POS                                   | POS        | NEG           | NEG           | NEG        | NEG         |  |
| 61908: in silico prediction             | POS                                                          | NEG       | NEG        | NEG         | POS                       | NEG                        | POS                                                          | POS         | NEG            | NEG         | POS          | POS                                   | POS        | NEG           | NEG           | NEG        | NEG         |  |
| M1790_98_1: in silico prediction        | POS                                                          | NEG       | NEG        | NEG         | POS                       | NEG                        | POS                                                          | POS         | NEG            | NEG         | POS          | POS                                   | POS        | NEG           | NEG           | NEG        | NEG         |  |
| GKP138-13: in silico prediction         | POS                                                          | NEG       | NEG        | NEG         | POS                       | NEG                        | POS                                                          | POS         | NEG            | NEG         | POS          | POS                                   | POS        | NEG           | NEG           | NEG        | NEG         |  |
| GKP138-2: in silico prediction          | POS                                                          | NEG       | NEG        | NEG         | POS                       | NEG                        | POS                                                          | POS         | NEG            | NEG         | POS          | POS                                   | POS        | NEG           | NEG           | NEG        | NEG         |  |
| GKP138-31: in silico prediction         | POS                                                          | NEG       | NEG        | NEG         | POS                       | NEG                        | POS                                                          | POS         | NEG            | NEG         | POS          | POS                                   | POS        | NEG           | NEG           | NEG        | NEG         |  |
| GKP138-33: in silico prediction         | POS                                                          | NEG       | NEG        | NEG         | POS                       | NEG                        | POS                                                          | POS         | NEG            | NEG         | POS          | POS                                   | POS        | NEG           | NEG           | NEG        | NEG         |  |
| GKP138-52: in silico prediction         | POS                                                          | NEG       | NEG        | NEG         | POS                       | NEG                        | POS                                                          | POS         | NEG            | NEG         | POS          | POS                                   | POS        | NEG           | NEG           | NEG        | NEG         |  |
| GKP138-78: in silico prediction         | POS                                                          | NEG       | NEG        | NEG         | POS                       | NEG                        | POS                                                          | POS         | NEG            | NEG         | POS          | POS                                   | POS        | NEG           | NEG           | NEG        | NEG         |  |
| GKP136-4: in silico prediction          | POS                                                          | NEG       | NEG        | NEG         | POS                       | NEG                        | POS                                                          | POS         | NEG            | NEG         | POS          | POS                                   | POS        | NEG           | NEG           | NEG        | NEG         |  |
| GKP136-4: in silico prediction          | POS                                                          | NEG       | NEG        | NEG         | POS                       | NEG                        | POS                                                          | POS         | NEG            | NEG         | POS          | POS                                   | POS        | NEG           | NEG           | NEG        | NEG         |  |
| ZTA09_03668_9_HSA: in silico prediction | POS                                                          | NEG       | NEG        | NEG         | POS                       | NEG                        | NEG                                                          | NEG         | NEG            | NEG         | NEG          | POS                                   | POS        | NEG           | NEG           | NEG        | NEG         |  |
| GKP136-58: in silico prediction         | POS                                                          | NEG       | NEG        | NEG         | POS                       | NEG                        | POS                                                          | POS         | NEG            | NEG         | POS          | POS                                   | POS        | NEG           | NEG           | NEG        | NEG         |  |
| 004_0004_23k: in silico prediction      | POS                                                          | NEG       | NEG        | NEG         | POS                       | NEG                        | POS                                                          | POS         | NEG            | NEG         | POS          | POS                                   | POS        | NEG           | NEG           | NEG        | NEG         |  |
| BA06_02038: in silico prediction        | POS                                                          | NEG       | NEG        | NEG         | POS                       | NEG                        | POS                                                          | POS         | NEG            | NEG         | POS          | POS                                   | POS        | NEG           | NEG           | NEG        | NEG         |  |
| GKP138-4: in silico prediction          | POS                                                          | NEG       | NEG        | NEG         | POS                       | NEG                        | POS                                                          | POS         | NEG            | NEG         | POS          | POS                                   | POS        | NEG           | NEG           | NEG        | NEG         |  |
| ZTA10_02421_9_HSA: in silico prediction | POS                                                          | NEG       | NEG        | NEG         | POS                       | NEG                        | POS                                                          | POS         | NEG            | NEG         | POS          | POS                                   | POS        | NEG           | NEG           | NEG        | NEG         |  |
| GKP136-62: in silico prediction         | POS                                                          | NEG       | NEG        | NEG         | POS                       | NEG                        | POS                                                          | POS         | NEG            | NEG         | POS          | POS                                   | POS        | NEG           | NEG           | NEG        | NEG         |  |
| LGA251: in silico prediction            | POS                                                          | NEG       | NEG        | NEG         | POS                       | NEG                        | POS                                                          | POS         | NEG            | NEG         | POS          | POS                                   | POS        | NEG           | NEG           | NEG        | NEG         |  |
| UK_NCTC13552: in silico prediction      | POS                                                          | NEG       | NEG        | NEG         | POS                       | NEG                        | POS                                                          | POS         | NEG            | NEG         | POS          | POS                                   | POS        | NEG           | NEG           | NEG        | NEG         |  |
| GKP138-74: in silico prediction         | POS                                                          | NEG       | NEG        | NEG         | POS                       | NEG                        | POS                                                          | POS         | NEG            | NEG         | POS          | POS                                   | POS        | NEG           | NEG           | NEG        | NEG         |  |
| cat-mandible-2013: in silico prediction | POS                                                          | NEG       | NEG        | NEG         | POS                       | NEG                        | POS                                                          | POS         | NEG            | NEG         | POS          | POS                                   | POS        | NEG           | NEG           | NEG        | NEG         |  |
| 10_7350_D: in silico prediction         | POS                                                          | NEG       | NEG        | NEG         | POS                       | NEG                        | POS                                                          | POS         | NEG            | NEG         | POS          | POS                                   | POS        | NEG           | NEG           | NEG        | NEG         |  |
| H114440275_A: in silico prediction      | POS                                                          | NEG       | NEG        | NEG         | POS                       | NEG                        | POS                                                          | POS         | NEG            | NEG         | POS          | POS                                   | POS        | NEG           | NEG           | NEG        | NEG         |  |

| STRAIN / ISOLATE                        | IMMUNOD.AG.B             |                | DEFENSIN RESIST.            |                 | TRANSFERRIN BINDING PROT    |                 |                             | PUTATIVE TRANSPORTER                                            |                        |              |              | TYPE I RESTRICTION-MODIFICATION SYSTEM, SINGLE SEQUENCE SPECIFICITY PROTEIN |               |                                                            |             |               |  |
|-----------------------------------------|--------------------------|----------------|-----------------------------|-----------------|-----------------------------|-----------------|-----------------------------|-----------------------------------------------------------------|------------------------|--------------|--------------|-----------------------------------------------------------------------------|---------------|------------------------------------------------------------|-------------|---------------|--|
|                                         | isaB                     |                | mprF                        |                 | isdA                        |                 |                             | lmrP                                                            |                        |              |              | hsdS1                                                                       |               | hsdS2                                                      |             |               |  |
|                                         | isaB                     | isaB (MRSA252) | mprF (COL+MW2)              | mprF (Mu50+252) | isdA (cons)                 | isdA (MRS2A252) | isdA (Other Than MRS2A252 ) | lmrP (OtherThanRF 122)                                          | lmrP (OtherThanRF 122) | lmrP (RF122) | lmrP (RF122) | hsdS1-RF122                                                                 | hsdS2-ST5+ST8 | hsdS2-MW2+476                                              | hsdS2-RF122 | hsdS2-MRSA252 |  |
|                                         | immunodominant antigen B |                | defensin resistance protein |                 | transferrin-binding protein |                 |                             | hypothetical protein, similar to integral membrane protein LmrP |                        |              |              | type I site-specific deoxyribo-nuclease subunit, 1st locus                  |               | type I site-specific deoxyribo-nuclease subunit, 2nd locus |             |               |  |
| V40-124624                              | POS                      | POS            | NEG                         | NEG             | POS                         | NEG             | POS                         | NEG                                                             | NEG                    | POS          | POS          | NEG                                                                         | NEG           | NEG                                                        | NEG         | POS           |  |
| V40-124624: in silico prediction        | POS                      | NEG            | NEG                         | POS             | POS                         | NEG             | POS                         | NEG                                                             | NEG                    | POS          | POS          | NEG                                                                         | NEG           | NEG                                                        | NEG         | POS           |  |
| SA-120: in silico prediction            | POS                      | NEG            | NEG                         | POS             | POS                         | NEG             | POS                         | NEG                                                             | NEG                    | POS          | POS          | NEG                                                                         | NEG           | NEG                                                        | NEG         | POS           |  |
| 61908: in silico prediction             | POS                      | NEG            | NEG                         | POS             | POS                         | NEG             | POS                         | NEG                                                             | NEG                    | POS          | POS          | NEG                                                                         | NEG           | NEG                                                        | NEG         | POS           |  |
| M1790_98_1: in silico prediction        | POS                      | NEG            | NEG                         | POS             | POS                         | NEG             | POS                         | NEG                                                             | NEG                    | POS          | POS          | NEG                                                                         | NEG           | NEG                                                        | NEG         | POS           |  |
| GKP138-13: in silico prediction         | POS                      | NEG            | NEG                         | POS             | POS                         | NEG             | POS                         | NEG                                                             | NEG                    | POS          | POS          | NEG                                                                         | NEG           | NEG                                                        | NEG         | POS           |  |
| GKP138-2: in silico prediction          | POS                      | NEG            | NEG                         | POS             | POS                         | NEG             | POS                         | NEG                                                             | NEG                    | POS          | POS          | NEG                                                                         | NEG           | NEG                                                        | NEG         | POS           |  |
| GKP138-31: in silico prediction         | POS                      | NEG            | NEG                         | POS             | POS                         | NEG             | POS                         | NEG                                                             | NEG                    | POS          | POS          | NEG                                                                         | NEG           | NEG                                                        | NEG         | POS           |  |
| GKP138-33: in silico prediction         | POS                      | NEG            | NEG                         | POS             | POS                         | NEG             | POS                         | NEG                                                             | NEG                    | POS          | POS          | NEG                                                                         | NEG           | NEG                                                        | NEG         | POS           |  |
| GKP138-52: in silico prediction         | POS                      | NEG            | NEG                         | POS             | POS                         | NEG             | POS                         | NEG                                                             | NEG                    | POS          | POS          | NEG                                                                         | NEG           | NEG                                                        | NEG         | POS           |  |
| GKP138-78: in silico prediction         | POS                      | NEG            | NEG                         | POS             | POS                         | NEG             | POS                         | NEG                                                             | NEG                    | POS          | POS          | NEG                                                                         | NEG           | NEG                                                        | NEG         | POS           |  |
| GKP136-4: in silico prediction          | POS                      | NEG            | NEG                         | POS             | POS                         | NEG             | POS                         | NEG                                                             | NEG                    | POS          | POS          | NEG                                                                         | NEG           | NEG                                                        | NEG         | POS           |  |
| ZTA09_03668_9_HSA: in silico prediction | POS                      | NEG            | NEG                         | POS             | POS                         | NEG             | POS                         | NEG                                                             | NEG                    | POS          | POS          | NEG                                                                         | NEG           | NEG                                                        | NEG         | POS           |  |
| GKP136-58: in silico prediction         | POS                      | NEG            | NEG                         | POS             | POS                         | NEG             | POS                         | NEG                                                             | NEG                    | POS          | POS          | NEG                                                                         | NEG           | NEG                                                        | NEG         | POS           |  |
| 004_0004_23k: in silico prediction      | POS                      | NEG            | NEG                         | POS             | POS                         | NEG             | POS                         | NEG                                                             | NEG                    | POS          | POS          | NEG                                                                         | NEG           | NEG                                                        | NEG         | POS           |  |
| BA06_02038: in silico prediction        | POS                      | NEG            | NEG                         | POS             | POS                         | NEG             | POS                         | NEG                                                             | NEG                    | POS          | POS          | NEG                                                                         | NEG           | NEG                                                        | NEG         | POS           |  |
| GKP138-4: in silico prediction          | POS                      | NEG            | NEG                         | POS             | POS                         | NEG             | POS                         | NEG                                                             | NEG                    | POS          | POS          | NEG                                                                         | NEG           | NEG                                                        | NEG         | POS           |  |
| ZTA10_02421_9_HSA: in silico prediction | POS                      | NEG            | NEG                         | POS             | POS                         | NEG             | POS                         | NEG                                                             | NEG                    | POS          | POS          | NEG                                                                         | NEG           | NEG                                                        | NEG         | POS           |  |
| GKP136-62: in silico prediction         | POS                      | NEG            | NEG                         | POS             | POS                         | NEG             | POS                         | NEG                                                             | NEG                    | POS          | POS          | NEG                                                                         | NEG           | NEG                                                        | NEG         | POS           |  |
| LGA251: in silico prediction            | POS                      | NEG            | NEG                         | POS             | POS                         | NEG             | POS                         | NEG                                                             | NEG                    | POS          | POS          | NEG                                                                         | NEG           | NEG                                                        | NEG         | POS           |  |
| UK_NCTC13552: in silico prediction      | POS                      | NEG            | NEG                         | POS             | POS                         | NEG             | POS                         | NEG                                                             | NEG                    | POS          | POS          | NEG                                                                         | NEG           | NEG                                                        | NEG         | POS           |  |
| GKP138-74: in silico prediction         | POS                      | NEG            | NEG                         | POS             | POS                         | NEG             | POS                         | NEG                                                             | NEG                    | POS          | POS          | NEG                                                                         | NEG           | NEG                                                        | NEG         | POS           |  |
| cat-mandible-2013: in silico prediction | POS                      | NEG            | NEG                         | POS             | POS                         | NEG             | POS                         | NEG                                                             | NEG                    | POS          | POS          | NEG                                                                         | NEG           | NEG                                                        | NEG         | POS           |  |
| 10_7350_D: in silico prediction         | POS                      | NEG            | NEG                         | POS             | POS                         | NEG             | POS                         | NEG                                                             | NEG                    | POS          | POS          | NEG                                                                         | NEG           | NEG                                                        | NEG         | POS           |  |
| H114440275_A: in silico prediction      | POS                      | NEG            | NEG                         | POS             | POS                         | NEG             | POS                         | NEG                                                             | NEG                    | POS          | POS          | NEG                                                                         | NEG           | NEG                                                        | NEG         | POS           |  |

| STRAIN / ISOLATE                        | TYPE I RESTRICTION-MODIFICATION SYSTEM, SINGLE SEQUENCE SPECIFICITY PROTEIN |                             |                     |                    |                   |                                                               |            | MISCELLANEOUS GENES |                  |                                     |                  |                                                           |                       |              |                     |                                     |
|-----------------------------------------|-----------------------------------------------------------------------------|-----------------------------|---------------------|--------------------|-------------------|---------------------------------------------------------------|------------|---------------------|------------------|-------------------------------------|------------------|-----------------------------------------------------------|-----------------------|--------------|---------------------|-------------------------------------|
|                                         | hsdS3                                                                       |                             |                     |                    |                   | hsdSx                                                         |            |                     | ear2 = Q2FXC0    | Q2YU83                              | Q7A4X2           | Q931R4<br>(CC5, CC15,<br>CC30, CC97,<br>CC188,<br>ST1850) | Q9RL82                |              |                     | Q2G1R6-<br>genomic<br>island / cstB |
|                                         | hsdS3-<br>AllOtherThan<br>RF122+252                                         | hsdS3-<br>ST8+ST1+RF12<br>2 | hsdS3-<br>Mu50+N315 | hsdS3-<br>CC51+252 | hsdS3-<br>MRSA252 | hsdSx-CC25                                                    | hsdSx-CC15 | hsdSx-etd           |                  |                                     |                  |                                                           | Q9RL82<br>(consensus) | Q9RL82 (CC8) | Q9RL82-<br>CC10/361 |                                     |
|                                         | type I site-specific deoxyribonuclease subunit, 3rd locus                   |                             |                     |                    |                   | type I site-specific deoxyribonuclease subunit, unknown locus |            |                     | Putative protein | Multidrug resistance<br>transporter | Putative protein | major facilitator<br>superfamily<br>transporter           | Putative protein      |              |                     |                                     |
| V40-124624                              | NEG                                                                         | NEG                         | NEG                 | NEG                | NEG               | NEG                                                           | POS        | POS                 | NEG              | NEG                                 | POS              | NEG                                                       | POS                   | POS          | NEG                 | POS                                 |
| V40-124624: in silico prediction        | NEG                                                                         | NEG                         | NEG                 | NEG                | NEG               | NEG                                                           | POS        | POS                 | NEG              | NEG                                 | POS              | NEG                                                       | POS                   | POS          | NEG                 | POS                                 |
| SA-120: in silico prediction            | NEG                                                                         | NEG                         | NEG                 | NEG                | NEG               | NEG                                                           | POS        | POS                 | NEG              | NEG                                 | POS              | NEG                                                       | POS                   | POS          | NEG                 | POS                                 |
| 61908: in silico prediction             | NEG                                                                         | NEG                         | NEG                 | NEG                | NEG               | NEG                                                           | POS        | POS                 | NEG              | NEG                                 | POS              | NEG                                                       | POS                   | POS          | NEG                 | POS                                 |
| M1790_98_1: in silico prediction        | NEG                                                                         | NEG                         | NEG                 | NEG                | NEG               | NEG                                                           | POS        | POS                 | NEG              | NEG                                 | POS              | NEG                                                       | POS                   | POS          | NEG                 | POS                                 |
| GKP138-13: in silico prediction         | NEG                                                                         | NEG                         | NEG                 | NEG                | NEG               | NEG                                                           | POS        | POS                 | NEG              | NEG                                 | POS              | NEG                                                       | POS                   | POS          | NEG                 | POS                                 |
| GKP138-2: in silico prediction          | NEG                                                                         | NEG                         | NEG                 | NEG                | NEG               | NEG                                                           | POS        | POS                 | NEG              | NEG                                 | POS              | NEG                                                       | POS                   | POS          | NEG                 | POS                                 |
| GKP138-31: in silico prediction         | NEG                                                                         | NEG                         | NEG                 | NEG                | NEG               | NEG                                                           | POS        | POS                 | NEG              | NEG                                 | POS              | NEG                                                       | POS                   | POS          | NEG                 | POS                                 |
| GKP138-33: in silico prediction         | NEG                                                                         | NEG                         | NEG                 | NEG                | NEG               | NEG                                                           | POS        | POS                 | NEG              | NEG                                 | POS              | NEG                                                       | POS                   | POS          | NEG                 | POS                                 |
| GKP138-52: in silico prediction         | NEG                                                                         | NEG                         | NEG                 | NEG                | NEG               | NEG                                                           | POS        | POS                 | NEG              | NEG                                 | POS              | NEG                                                       | POS                   | POS          | NEG                 | POS                                 |
| GKP138-78: in silico prediction         | NEG                                                                         | NEG                         | NEG                 | NEG                | NEG               | NEG                                                           | POS        | POS                 | NEG              | NEG                                 | POS              | NEG                                                       | POS                   | POS          | NEG                 | POS                                 |
| GKP136-4: in silico prediction          | NEG                                                                         | NEG                         | NEG                 | NEG                | NEG               | NEG                                                           | POS        | POS                 | NEG              | NEG                                 | POS              | NEG                                                       | POS                   | POS          | NEG                 | POS                                 |
| ZTA09_03668_9_HSA: in silico prediction | NEG                                                                         | NEG                         | NEG                 | NEG                | NEG               | NEG                                                           | POS        | POS                 | NEG              | NEG                                 | POS              | NEG                                                       | POS                   | POS          | NEG                 | POS                                 |
| GKP136-58: in silico prediction         | NEG                                                                         | NEG                         | NEG                 | NEG                | NEG               | NEG                                                           | POS        | POS                 | NEG              | NEG                                 | POS              | NEG                                                       | POS                   | POS          | NEG                 | POS                                 |
| 004_0004_23k: in silico prediction      | NEG                                                                         | NEG                         | NEG                 | NEG                | NEG               | NEG                                                           | POS        | POS                 | NEG              | NEG                                 | POS              | NEG                                                       | POS                   | POS          | NEG                 | POS                                 |
| BA06_02038: in silico prediction        | NEG                                                                         | NEG                         | NEG                 | NEG                | NEG               | NEG                                                           | POS        | POS                 | NEG              | NEG                                 | POS              | NEG                                                       | POS                   | POS          | NEG                 | POS                                 |
| GKP138-4: in silico prediction          | NEG                                                                         | NEG                         | NEG                 | NEG                | NEG               | NEG                                                           | POS        | POS                 | NEG              | NEG                                 | POS              | NEG                                                       | POS                   | POS          | NEG                 | POS                                 |
| ZTA10_02421_9_HSA: in silico prediction | NEG                                                                         | NEG                         | NEG                 | NEG                | NEG               | NEG                                                           | POS        | POS                 | NEG              | NEG                                 | POS              | NEG                                                       | POS                   | POS          | NEG                 | POS                                 |
| GKP136-62: in silico prediction         | NEG                                                                         | NEG                         | NEG                 | NEG                | NEG               | NEG                                                           | POS        | POS                 | NEG              | NEG                                 | POS              | NEG                                                       | POS                   | POS          | NEG                 | POS                                 |
| LGA251: in silico prediction            | NEG                                                                         | NEG                         | NEG                 | NEG                | NEG               | NEG                                                           | POS        | POS                 | NEG              | NEG                                 | POS              | NEG                                                       | POS                   | POS          | NEG                 | POS                                 |
| UK_NCTC13552: in silico prediction      | NEG                                                                         | NEG                         | NEG                 | NEG                | NEG               | NEG                                                           | POS        | POS                 | NEG              | NEG                                 | POS              | NEG                                                       | POS                   | POS          | NEG                 | POS                                 |
| GKP138-74: in silico prediction         | NEG                                                                         | NEG                         | NEG                 | NEG                | NEG               | NEG                                                           | POS        | POS                 | NEG              | NEG                                 | POS              | NEG                                                       | POS                   | POS          | NEG                 | POS                                 |
| cat-mandible-2013: in silico prediction | NEG                                                                         | NEG                         | NEG                 | NEG                | NEG               | NEG                                                           | POS        | POS                 | NEG              | NEG                                 | POS              | NEG                                                       | POS                   | POS          | NEG                 | POS                                 |
| 10_7350_D: in silico prediction         | NEG                                                                         | NEG                         | NEG                 | NEG                | NEG               | NEG                                                           | POS        | POS                 | NEG              | NEG                                 | POS              | NEG                                                       | POS                   | POS          | NEG                 | POS                                 |
| H114440275_A: in silico prediction      | NEG                                                                         | NEG                         | NEG                 | NEG                | NEG               | NEG                                                           | POS        | POS                 | NEG              | NEG                                 | POS              | NEG                                                       | POS                   | POS          | NEG                 | POS                                 |

| STRAIN / ISOLATE                        | MISCELLANEOUS GENES                                  |        |          |          |        |                                                                  |                                                                  |                                                            |                       |                      |                                     |                                                  | HYALURONATE LYASE  |                                                     |                                                              |                                      |                                    |                                                      |                                                      |                    |
|-----------------------------------------|------------------------------------------------------|--------|----------|----------|--------|------------------------------------------------------------------|------------------------------------------------------------------|------------------------------------------------------------|-----------------------|----------------------|-------------------------------------|--------------------------------------------------|--------------------|-----------------------------------------------------|--------------------------------------------------------------|--------------------------------------|------------------------------------|------------------------------------------------------|------------------------------------------------------|--------------------|
|                                         | sau                                                  |        |          |          | sau96I | G7ZRu6                                                           | ycjY                                                             | sagD                                                       | G7ZTC1                |                      | sdrM /<br>tetEfflux                 | Q2YUB3                                           | hysA1              |                                                     |                                                              | hysA2                                |                                    |                                                      |                                                      |                    |
|                                         | sau3AI                                               | sauUSI | sauRF122 | sauSO385 |        |                                                                  |                                                                  |                                                            | G7ZTC1                | G7ZTC1-<br>argenteus |                                     |                                                  | hysA1<br>(MRSa252) | hysA1<br>(MRSa252+RF<br>122) and/or<br>hysA2 (cons) | hysA1<br>(MRSa252+RF<br>122) and/or<br>hysA2<br>(COL+USA300) | hysA2 (All<br>Other Than<br>MRSa252) | hysA2<br>(COL+USA300<br>+NCTC8325) | hysA2 (All<br>Other Than<br>COL+USA300+<br>NCTC8325) | hysA2 (All<br>Other Than<br>COL+USA300+<br>NCTC8325) | hysA2<br>(MRSa252) |
|                                         |                                                      |        |          |          |        |                                                                  |                                                                  |                                                            |                       |                      |                                     |                                                  |                    |                                                     |                                                              |                                      |                                    |                                                      |                                                      |                    |
|                                         | type II restriction-modification system endonuclease |        |          |          |        | acetyltransferase,<br>GNAT family,<br>"Argenteus/ST1850<br>like" | Marker for<br>"Argenteus/ST1850-<br>like", CC12, CC361,<br>CC398 | Putative bacteriocin<br>biosynthesis<br>associated protein | TetR family regulator |                      | Multidrug resistance<br>transporter | Hyaluronate lyase, variable first / second locus |                    |                                                     |                                                              | Hyaluronate lyase, second locus      |                                    |                                                      |                                                      |                    |
|                                         |                                                      |        |          |          |        |                                                                  |                                                                  |                                                            |                       |                      |                                     |                                                  |                    |                                                     |                                                              |                                      |                                    |                                                      |                                                      |                    |
| V40-124624                              | NEG                                                  | POS    | NEG      | NEG      | NEG    | NEG                                                              | NEG                                                              | NEG                                                        | NEG                   | NEG                  | POS                                 | NEG                                              | POS                | POS                                                 | POS                                                          | NEG                                  | POS                                | POS                                                  | POS                                                  | NEG                |
| V40-124624: in silico prediction        | NEG                                                  | POS    | NEG      | NEG      | NEG    | NEG                                                              | NEG                                                              | NEG                                                        | NEG                   | NEG                  | POS                                 | NEG                                              | POS                | POS                                                 | POS                                                          | NEG                                  | NEG                                | POS                                                  | POS                                                  | POS                |
| SA-120: in silico prediction            | NEG                                                  | POS    | NEG      | NEG      | NEG    | NEG                                                              | NEG                                                              | NEG                                                        | NEG                   | NEG                  | POS                                 | NEG                                              | POS                | POS                                                 | POS                                                          | NEG                                  | NEG                                | POS                                                  | AMB                                                  | NEG                |
| 61908: in silico prediction             | NEG                                                  | POS    | NEG      | NEG      | NEG    | NEG                                                              | NEG                                                              | NEG                                                        | NEG                   | NEG                  | POS                                 | NEG                                              | POS                | POS                                                 | POS                                                          | NEG                                  | NEG                                | POS                                                  | AMB                                                  | NEG                |
| M1790_98_1: in silico prediction        | NEG                                                  | POS    | NEG      | NEG      | NEG    | NEG                                                              | NEG                                                              | NEG                                                        | NEG                   | NEG                  | POS                                 | NEG                                              | POS                | POS                                                 | POS                                                          | NEG                                  | NEG                                | POS                                                  | AMB                                                  | NEG                |
| GKP138-13: in silico prediction         | NEG                                                  | POS    | NEG      | NEG      | NEG    | NEG                                                              | NEG                                                              | NEG                                                        | NEG                   | NEG                  | POS                                 | NEG                                              | POS                | POS                                                 | POS                                                          | NEG                                  | NEG                                | POS                                                  | AMB                                                  | NEG                |
| GKP138-2: in silico prediction          | NEG                                                  | POS    | NEG      | NEG      | NEG    | NEG                                                              | NEG                                                              | NEG                                                        | NEG                   | NEG                  | POS                                 | NEG                                              | POS                | POS                                                 | POS                                                          | NEG                                  | NEG                                | POS                                                  | AMB                                                  | NEG                |
| GKP138-31: in silico prediction         | NEG                                                  | POS    | NEG      | NEG      | NEG    | NEG                                                              | NEG                                                              | NEG                                                        | NEG                   | NEG                  | POS                                 | NEG                                              | POS                | POS                                                 | POS                                                          | NEG                                  | NEG                                | POS                                                  | AMB                                                  | NEG                |
| GKP138-33: in silico prediction         | NEG                                                  | POS    | NEG      | NEG      | NEG    | NEG                                                              | NEG                                                              | NEG                                                        | NEG                   | NEG                  | POS                                 | NEG                                              | POS                | POS                                                 | POS                                                          | NEG                                  | NEG                                | POS                                                  | AMB                                                  | NEG                |
| GKP138-52: in silico prediction         | NEG                                                  | POS    | NEG      | NEG      | NEG    | NEG                                                              | NEG                                                              | NEG                                                        | NEG                   | NEG                  | POS                                 | NEG                                              | POS                | POS                                                 | POS                                                          | NEG                                  | NEG                                | POS                                                  | AMB                                                  | NEG                |
| GKP138-78: in silico prediction         | NEG                                                  | POS    | NEG      | NEG      | NEG    | NEG                                                              | NEG                                                              | NEG                                                        | NEG                   | NEG                  | POS                                 | NEG                                              | POS                | POS                                                 | POS                                                          | NEG                                  | NEG                                | POS                                                  | AMB                                                  | NEG                |
| GKP136-4: in silico prediction          | NEG                                                  | POS    | NEG      | NEG      | NEG    | NEG                                                              | NEG                                                              | NEG                                                        | NEG                   | NEG                  | POS                                 | NEG                                              | POS                | POS                                                 | POS                                                          | NEG                                  | NEG                                | POS                                                  | AMB                                                  | NEG                |
| ZTA09_03668_9_HSA: in silico prediction | NEG                                                  | POS    | NEG      | NEG      | NEG    | NEG                                                              | NEG                                                              | NEG                                                        | NEG                   | NEG                  | POS                                 | NEG                                              | POS                | POS                                                 | POS                                                          | NEG                                  | NEG                                | POS                                                  | AMB                                                  | NEG                |
| GKP136-58: in silico prediction         | NEG                                                  | POS    | NEG      | NEG      | NEG    | NEG                                                              | NEG                                                              | NEG                                                        | NEG                   | NEG                  | POS                                 | NEG                                              | POS                | POS                                                 | POS                                                          | NEG                                  | NEG                                | POS                                                  | AMB                                                  | NEG                |
| 004_0004_23k: in silico prediction      | NEG                                                  | POS    | NEG      | NEG      | NEG    | NEG                                                              | NEG                                                              | NEG                                                        | NEG                   | NEG                  | POS                                 | NEG                                              | POS                | POS                                                 | POS                                                          | NEG                                  | NEG                                | POS                                                  | AMB                                                  | NEG                |
| BA06_02038: in silico prediction        | NEG                                                  | POS    | NEG      | NEG      | NEG    | NEG                                                              | NEG                                                              | NEG                                                        | NEG                   | NEG                  | POS                                 | NEG                                              | POS                | POS                                                 | POS                                                          | NEG                                  | NEG                                | POS                                                  | AMB                                                  | NEG                |
| GKP138-4: in silico prediction          | NEG                                                  | POS    | NEG      | NEG      | NEG    | NEG                                                              | NEG                                                              | NEG                                                        | NEG                   | NEG                  | POS                                 | NEG                                              | POS                | POS                                                 | POS                                                          | NEG                                  | NEG                                | POS                                                  | AMB                                                  | NEG                |
| ZTA10_02421_9_HSA: in silico prediction | NEG                                                  | POS    | NEG      | NEG      | NEG    | NEG                                                              | NEG                                                              | NEG                                                        | NEG                   | NEG                  | POS                                 | NEG                                              | POS                | POS                                                 | POS                                                          | NEG                                  | NEG                                | POS                                                  | AMB                                                  | NEG                |
| GKP136-62: in silico prediction         | NEG                                                  | POS    | NEG      | NEG      | NEG    | NEG                                                              | NEG                                                              | NEG                                                        | NEG                   | NEG                  | POS                                 | NEG                                              | POS                | POS                                                 | POS                                                          | NEG                                  | NEG                                | POS                                                  | AMB                                                  | NEG                |
| LGA251: in silico prediction            | NEG                                                  | POS    | NEG      | NEG      | NEG    | NEG                                                              | NEG                                                              | NEG                                                        | NEG                   | NEG                  | POS                                 | NEG                                              | POS                | POS                                                 | POS                                                          | NEG                                  | NEG                                | POS                                                  | AMB                                                  | NEG                |
| UK_NCTC13552: in silico prediction      | NEG                                                  | POS    | NEG      | NEG      | NEG    | NEG                                                              | NEG                                                              | NEG                                                        | NEG                   | NEG                  | POS                                 | NEG                                              | POS                | POS                                                 | POS                                                          | NEG                                  | NEG                                | POS                                                  | AMB                                                  | NEG                |
| GKP138-71: in silico prediction         | NEG                                                  | POS    | NEG      | NEG      | NEG    | NEG                                                              | NEG                                                              | NEG                                                        | NEG                   | NEG                  | POS                                 | NEG                                              | POS                | POS                                                 | POS                                                          | NEG                                  | NEG                                | POS                                                  | AMB                                                  | NEG                |
| cat-mandible-2013: in silico prediction | NEG                                                  | POS    | NEG      | NEG      | NEG    | NEG                                                              | NEG                                                              | NEG                                                        | NEG                   | NEG                  | POS                                 | NEG                                              | POS                | POS                                                 | POS                                                          | NEG                                  | NEG                                | POS                                                  | AMB                                                  | NEG                |
| 10_7350_D: in silico prediction         | NEG                                                  | POS    | NEG      | NEG      | NEG    | NEG                                                              | NEG                                                              | NEG                                                        | NEG                   | NEG                  | POS                                 | NEG                                              | POS                | POS                                                 | POS                                                          | NEG                                  | NEG                                | POS                                                  | AMB                                                  | NEG                |
| H114440275_A: in silico prediction      | NEG                                                  | POS    | NEG      | NEG      | NEG    | NEG                                                              | NEG                                                              | NEG                                                        | NEG                   | NEG                  | POS                                 | NEG                                              | POS                | POS                                                 | POS                                                          | NEG                                  | NEG                                | POS                                                  | AMB                                                  | NEG                |
