# Supplementary material for: Characterisation of a Staphylococcus aureus Isolate Carrying Phage-Borne Enterotoxin E from a European Badger (Meles meles)
Source: MDPI journal article supplement (doi:10.3390/pathogens12050704), 2023-05-12
Supplement: s1 [file s1]

**SUPPLEMENTAL FILE 1: TARGET GENES, PRIMERS AND PROBES**

| Nr. | Symbol           | Synonymes | Alleles            | Name / description of gene or gene product                        | probe                                                    | Probe sequence                                                    | Primer sequence                                                                                           |
|-----|------------------|-----------|--------------------|-------------------------------------------------------------------|----------------------------------------------------------|-------------------------------------------------------------------|-----------------------------------------------------------------------------------------------------------|
| 1.  | <i>aacA-aphD</i> | -         | -                  | bifunctional enzyme Aac/Aph, gentamicin resistance                | aacA-aphD_10,4                                           | AB096217.1[28286:28313]                                           | AB096217.1[28367:28386:r]                                                                                 |
| 2.  | <i>aadD</i>      | -         | -                  | aminoglycoside adenylyltransferase, tobramycin resistance         | aadD_1,2_PM4                                             | AB037420.1[788:815]                                               | AB037420.1[854:874:r]                                                                                     |
| 3.  | <i>agrB</i>      | -         | <i>agrB-I</i>      | accessory gene regulator B                                        | <i>agrB-I_11</i>                                         | AF026120.1[3:29]                                                  | AF026120.1[57:79:r]                                                                                       |
|     |                  | -         | <i>agrB-II</i>     |                                                                   | <i>agrB-II_11</i>                                        | AB043554.1[824:852]                                               | AB043554.1[853:871:r]                                                                                     |
|     |                  | -         | <i>agrB-III</i>    |                                                                   | <i>agrB-III_11</i>                                       | AB043555.1[971:1000]                                              | AB043555.1[1029:1051:r]                                                                                   |
|     |                  | -         | <i>agrB-IV</i>     |                                                                   | <i>agrB-IV_11</i>                                        | AF288215.1[1200:1226]                                             | AF288215.1[1255:1275:r]                                                                                   |
| 4.  | <i>agrC</i>      | -         | <i>agrC-I</i>      | accessory gene regulator C                                        | <i>agrC-I</i>                                            | AB043554.1[1741:1767]                                             | AB043554.1[1826:1846:r]                                                                                   |
|     |                  | -         | <i>agrC-II</i>     |                                                                   | <i>agrC-II</i>                                           | AF001782.1[892:917]                                               | AF001782.1[983:1005:r]                                                                                    |
|     |                  | -         | <i>agrC-III</i>    |                                                                   | <i>agrC-III</i>                                          | AF001783.1[1051:1077]                                             | AF001783.1[1086:1107:r]                                                                                   |
|     |                  | -         | <i>agrC-IV</i>     |                                                                   | <i>agrC-IV</i>                                           | AF288215.1[1553:1580]                                             | AF288215.1[2049:2069:r]                                                                                   |
| 5.  | <i>agrD</i>      | -         | <i>agrD-I</i>      | accessory gene regulator D                                        | <i>agrD-I_11</i><br><i>agrD-I_12</i><br><i>agrD-I_13</i> | AF026120.1[144:171]<br>AJ617706.1[599:626]<br>AF210055.1[599:625] | AF026120.1[175:196:r]                                                                                     |
|     |                  | -         | <i>agrD-II</i>     |                                                                   | <i>agrD-II</i>                                           | AF001782.1[650:679]                                               | AF001782.1[681:702:r]                                                                                     |
|     |                  | -         | <i>agrD-III</i>    |                                                                   | <i>agrD-III</i>                                          | AB043555.1[1072:1101]                                             | AB043555.1[1108:1124:r]                                                                                   |
| 6.  | <i>aphA3</i>     | -         | -                  | 3'5'-aminoglycoside phosphotransferase, neo-/kanamycin resistance | aphA-3_18,3                                              | U51474.1[1553:1578:r]                                             | U51474.1[1654:1671]                                                                                       |
| 7.  | <i>arcA</i>      | -         | <i>arcA-SCC</i>    | ACME-locus                                                        | hp_arcA_611                                              | AE015929.1[102505:102530:r]                                       | AE015929.1[102460:102479]                                                                                 |
| 8.  | <i>arcB</i>      | -         | <i>arcB-SCC</i>    | ACME-locus: ornithincarbamoyltransferase                          | hp_arcB_611                                              | AE015929.1[99281:99307:r]                                         | AE015929.1[99256:99274]                                                                                   |
| 9.  | <i>arcC</i>      | -         | <i>arcC-SCC</i>    | ACME-locus: carbamatkinase                                        | hp_arcC_611                                              | AE015929.1[98603:98631:r]                                         | AE015929.1[98571:98590]                                                                                   |
| 10. | <i>arcD</i>      | -         | <i>arcD-SCC</i>    | ACME-locus: arginine/ornithine-antiporter                         | hp_arcD_611                                              | AE015929.1[101412:101440:r]                                       | AE015929.1[101381:101398]                                                                                 |
| 11. | <i>aur</i>       | -         | -                  | aureolysin                                                        | hp_aur_613,<br>hp_aur_611                                | AC027136.7[28379:28408:r],<br>AC027136.7[28846:28874:r]           | AC027136.7[28345:28365],<br>AC027136.7[28812:28831]                                                       |
|     |                  | -         | <i>aur-MRSA252</i> |                                                                   | hp_aur_613,<br>hp_aur_612                                | AC027136.7[28379:28408:r],<br>AJ249166.1[1026:1053]               | AC027136.7[28345:28365],<br>AJ249166.1[1067:1088:r]                                                       |
| 12. | <i>bap</i>       | -         | -                  | surface protein involved in biofilm formation                     | hp_bap_611                                               | AY220730.1[7832:7860]                                             | AY220730.1[7869:7891:r]                                                                                   |
|     | <i>bbp</i>       | -         | <i>bbp-COL</i>     | bone sialoprotein-binding protein                                 | hp_bbp_616,<br>hp_bbp_614                                | AJ005647.1[2220:2246],<br>AB246401.1[76:104]                      | AB246401.1[2256:2278:r],<br>AB246401.1[132:149:r]                                                         |
|     |                  | -         | <i>bbp-H6606</i>   |                                                                   | hp_bbp_611                                               | AM076252.1[3:31]                                                  | AM076252.1[37:59:r]                                                                                       |
|     |                  | -         | <i>bbp-MRSA252</i> |                                                                   | hp_bbp_613,<br>hp_bbp_614                                | AB246401.1[1671:1696],<br>AB246401.1[76:104]                      | AB246401.1[2373:2393:r],<br>AB246401.1[2256:2278:r],<br>AB246401.1[1720:1739:r],<br>AB246401.1[132:149:r] |
|     |                  | -         | <i>bbp-MW2</i>     |                                                                   | hp_bbp_616,<br>hp_bbp_614                                | AJ005647.1[2220:2246],<br>AB246401.1[76:104]                      | AB246401.1[2373:2393:r],<br>AB246401.1[132:149:r]                                                         |

| Nr. | Symbol                         | Synonymes | Alleles               | Name / description of gene or gene product                                     | probe                           | Probe sequence                                            | Primer sequence                                                                   |
|-----|--------------------------------|-----------|-----------------------|--------------------------------------------------------------------------------|---------------------------------|-----------------------------------------------------------|-----------------------------------------------------------------------------------|
|     |                                | -         | <i>bbp-Mu50</i>       |                                                                                | hp_bbp_617,<br>hp_bbp_614       | AM076243.1[295:323],<br>AB246401.1[76:104]                | AB246401.1[2256:2278:r],<br>AB246401.1[132:149:r],<br>AM076243.1[349:368:r]       |
|     |                                | -         | <i>bbp-RF122</i>      |                                                                                | hp_bbp_612,<br>hp_bbp_614       | AJ938182.1[578264:578291],<br>AB246401.1[76:104]          | AB246401.1[2373:2393:r],<br>AB246401.1[132:149:r],<br>AJ938182.1[578305:578327:r] |
| 13. | <b><i>blaI</i></b>             | -         | -                     | beta lactamase repressor (inhibitor)                                           | hp_blaI_611                     | AB179623.1[12885:12911]                                   | AB179623.1[12931:12952:r]                                                         |
| 14. | <b><i>blaR</i></b>             | -         | <i>blaR-MRSA252</i>   | beta-lactamase regulatory protein                                              | hp_blaR_612,<br>hp_blaR_611     | AB179623.1[12517:12546],<br>AB179623.1[11832:11859]       | AB179623.1[11892:11912:r],<br>AB179623.1[12560:12583:r]                           |
|     |                                | -         | <i>blaR-Sepi</i>      |                                                                                | hp_blaR_613,<br>hp_blaR_611     | AE015929.1[1662669:1662697:r],<br>AB179623.1[11832:11859] | AE015929.1[1663304:1663323],<br>AB179623.1[12560:12583:r]                         |
| 15. | <b><i>blaZ</i></b>             | -         | -                     | beta-lactamase                                                                 | hp_blaZ_611,<br>blaZ_11         | AB179623.1[10303:10331:r],<br>AB179623.1[10813:10837:r]   | AB179623.1[10264:10281],<br>AB179623.1[10713:10735]                               |
| 16. | <b><i>blaZ - SCCmec XI</i></b> |           |                       | beta-lactamase from SCCmec XI                                                  | hp_01_blaZ_M10                  | FR823292.1[1453:1479:r]                                   | FR823292.1[1429:1448]                                                             |
| 17. | <b><i>capH</i></b>             | -         | <i>capH1</i>          | capsular polysaccharide synthesis enzyme CapH of capsule types 1, 5, and 8     | hp_capH1_611                    | U10927.2[19165:19192]                                     | U10927.2[19210:19230:r]                                                           |
|     |                                | -         | <i>capH5</i>          |                                                                                | hp_capH5_611                    | AC069081.4[6478:6502]                                     | AC069081.4[6518:6538:r]                                                           |
|     |                                | -         | <i>capH8</i>          |                                                                                | hp_capH8_611                    | AJ938182.1[120208:120236]                                 | AJ938182.1[120239:120260:r]                                                       |
| 18. | <b><i>capI</i></b>             | -         | <i>capI8</i>          | capsular polysaccharide biosynthesis protein CapI                              | hp_capI8_612                    | AJ938182.1[121964:121993]                                 | AJ938182.1[122007:122027:r]                                                       |
| 19. | <b><i>capJ</i></b>             | -         | <i>capJ1</i>          | O-antigen polymerase CapJ of capsule types 1, 5, and 8                         | hp_capJ1_611                    | U10927.2[21322:21350]                                     | U10927.2[21367:21385:r]                                                           |
|     |                                | -         | <i>capJ5</i>          |                                                                                | hp_capJ5_612,<br>hp_capJ5_611   | AC069081.4[8701:8730:r],<br>AC069081.4[8535:8563]         | AC069081.4[8673:8694],<br>AC069081.4[8573:8590:r]                                 |
|     |                                | -         | <i>capJ8</i>          |                                                                                | hp_capJ8_611                    | AJ938182.1[122465:122495]                                 | AJ938182.1[122504:122521:r]                                                       |
| 20. | <b><i>capK</i></b>             | -         | <i>capK1</i>          | capsular polysaccharide biosynthesis protein CapK of capsule types 1, 5, and 8 | hp_capK1_611                    | U10927.2[22439:22466]                                     | U10927.2[22490:22508:r]                                                           |
|     |                                | -         | <i>capK5</i>          |                                                                                | hp_capK5_611                    | AC069081.4[9893:9921]                                     | AC069081.4[9933:9952:r]                                                           |
|     |                                | -         | <i>capK8</i>          |                                                                                | hp_capK8_611,<br>hp_capK8_612   | AJ938182.1[122685:122712],<br>AJ938182.1[123625:123651]   | AJ938182.1[123653:123675:r],<br>AJ938182.1[122716:122740:r]                       |
| 21. | <b><i>cat</i></b>              | -         | <i>cat-pC221</i>      | chloramphenicol acetyltransferase                                              | hp_cat_613                      | M64281.1[358:389]                                         | M64281.1[403:426:r]                                                               |
|     |                                | -         | <i>cat-pC223</i>      |                                                                                | hp_cat_611                      | AF507977.1[17615:17642]                                   | AF507977.1[17658:17682:r]                                                         |
|     |                                | -         | <i>cat-pMC524</i>     |                                                                                | hp_cat_612                      | AB080798.1[2826:2854]                                     | AJ312056.2[587:605:r],<br>AB080798.1[2860:2878:r]                                 |
|     |                                | -         | <i>cat-pSBK203R</i>   |                                                                                | hp_cat_615                      | M58515.1[353:384]                                         | M58515.1[407:431:r]                                                               |
| 22. | <b><i>ccrA</i></b>             | -         | <i>ccrA-1</i>         | cassette chromosome recombinase A,                                             | hp_ccrA-1_611,<br>hp_ccrA-1_612 | AB033763.2[24367:24393],<br>AB033763.2[24614:24641]       | AB033763.2[24397:24416:r],<br>AB033763.2[24649:24667:r]                           |
|     |                                | -         | <i>ccrA-2</i>         |                                                                                | hp_ccrA-2_612,<br>hp_ccrA-2_611 | AB063172.2[10457:10485],<br>AB063172.2[9903:9931]         | AB063172.2[9939:9955:r],<br>AB063172.2[10489:10507:r]                             |
|     |                                | -         | <i>ccrA-3</i>         |                                                                                | hp_ccrA-3_612,<br>hp_ccrA-3_611 | AB014436.1[787:813],<br>AB014436.1[254:279]               | AB014436.1[283:300:r],<br>AB014436.1[826:844:r]                                   |
|     |                                | -         | <i>ccrA-4</i>         |                                                                                | hp_ccrA-4_611                   | AF411935.1[8536:8563]                                     | AF411935.1[8803:8823:r]                                                           |
| 23. | <b><i>“ccrAA”</i></b>          | -         | <i>ccrAA-85-2082</i>  | hypothetical protein accompanying <i>ccrC</i>                                  | hp_ccrAA_611                    | AB037671.1[61431:61460:r]                                 | AB037671.1[61397:61418]                                                           |
|     |                                | -         | <i>ccrAA-MRSAZH47</i> |                                                                                | hp_ccrAA_613,<br>hp_ccrAA_612   | AM292304.1[6991:7016],<br>AM292304.1[6601:6626]           | AM292304.1[6629:6648:r],<br>AM292304.1[7020:7038:r]                               |

| Nr. | Symbol                   | Synonymes | Alleles                        | Name / description of gene or gene product         | probe                                             | Probe sequence                                                                  | Primer sequence                                                                       |
|-----|--------------------------|-----------|--------------------------------|----------------------------------------------------|---------------------------------------------------|---------------------------------------------------------------------------------|---------------------------------------------------------------------------------------|
| 24. | <b><i>ccrB</i></b>       | -         | <i>ccrB-1</i>                  | cassette chromosome recombinase B                  | hp_ccrB-1_612,<br>hp_ccrB-1_613,<br>hp_ccrB-1_611 | AB033763.2[25387:25411],<br>AB033763.2[25216:25245],<br>AB063171.1[13751:13773] | AB033763.2[25251:25268:r],<br>AB033763.2[25425:25445:r]                               |
|     |                          | -         | <i>ccrB-2</i>                  |                                                    | hp_ccrB-2_611,<br>hp_ccrB-2_612                   | AB063172.2[12275:12302],<br>AB063172.2[12499:12528]                             | AB063172.2[12548:12567:r],<br>AB096217.1[15001:15022:r],<br>AB063172.2[12308:12331:r] |
|     |                          | -         | <i>ccrB-3</i>                  |                                                    | hp_ccrB-3_611,<br>hp_ccrB-3_612                   | AB014436.1[2110:2135],<br>AB014436.1[2215:2243]                                 | AB014436.1[2265:2286:r],<br>AB014436.1[2160:2179:r]                                   |
|     |                          | -         | <i>ccrB-4</i>                  |                                                    | hp_ccrB-4_611                                     | AE015929.1[59605:59629:r]                                                       | AE015929.1[59457:59474]                                                               |
| 25. | <b><i>ccrC</i></b>       | -         | -                              | cassette chromosome recombinase B,                 | hp_ccrC_611                                       | AB037671.1[60667:60697:r]                                                       | AB037671.1[60643:60662]                                                               |
| 26. | <b><i>cfr</i></b>        | -         | -                              | 23S rRNA methyltransferase                         | hp_cfr_611                                        | AJ249217.1[1048:1074]                                                           | AJ249217.1[1075:1093:r]                                                               |
| 27. | <b><i>chp</i></b>        | -         | -                              | chemotaxis-inhibiting protein (CHIPS)              | hp_chp_611,<br>hp_chp_612                         | AB033232.1[8395:8421:r],<br>AB033232.1[8142:8170:r]                             | AB033232.1[8106:8129],<br>AB033232.1[8353:8373]                                       |
| 28. | <b><i>clfA</i></b>       | -         | <i>clfA-COL</i>                | clumping factor A                                  | hp_clfA_612,<br>hp_clfA_611                       | AC074317.5[4999:5027:r],<br>AB245456.1[496:524]                                 | AB245456.1[1578:1599:r],<br>AB245456.1[550:569:r]                                     |
|     |                          |           | <i>clfA-MRSA252</i>            |                                                    | hp_clfA_613,<br>hp_clfA_611                       | AB245456.1[1551:1576],<br>AB245456.1[496:524]                                   | AB245456.1[1578:1599:r],<br>AB245456.1[550:569:r]                                     |
|     |                          |           | <i>clfA-MW2</i>                |                                                    | hp_clfA_611,<br>hp_clfA_614                       | AB245456.1[496:524],<br>AM075836.1[1128:1152]                                   | AB245456.1[1578:1599:r],<br>AB245456.1[550:569:r]                                     |
| 29. | <b><i>clfB</i></b>       | -         | <i>clfB-COL</i>                | clumping factor B                                  | hp_clfB_611,<br>hp_clfB_612                       | AC027136.7[20622:20652:r],<br>AC027136.7[19674:19705:r]                         | AC027136.7[20592:20610],<br>AC027136.7[19626:19648]                                   |
|     |                          |           | <i>clfB-MRSA252</i>            |                                                    | hp_clfB_611,<br>hp_clfB_613                       | AC027136.7[20622:20652:r],<br>AM075901.1[1069:1098]                             | AJ938182.1[2647686:2647709],<br>AC027136.7[20592:20610]                               |
|     |                          |           | <i>clfB-RF122</i>              |                                                    | hp_clfB_614,<br>hp_clfB_611                       | AJ938182.1[2647736:2647765:r],<br>AC027136.7[20622:20652:r]                     | AJ938182.1[2647686:2647709],<br>AC027136.7[20592:20610]                               |
| 30. | <b><i>cna</i></b>        | -         | -                              | collagen-binding adhesin                           | hp_cna_611                                        | AB266874.1[435:461]                                                             | AB266874.1[469:487:r]                                                                 |
| 31. | <b><i>coa</i></b>        | -         | -                              | coagulase                                          | coa_consens_11                                    | CP000046.1 [246925:246954]                                                      | CP000046.1[246967:246988]                                                             |
| 32. | <b><i>corB</i></b>       | <i>hl</i> | -                              | putative membrane protein                          | hl_11                                             | BA000017.4 [963137:963165]                                                      | BA000017.4[963188:963206:r]                                                           |
| 33. | <b><i>dcs-Q9XB68</i></b> | -         | <i>Q9XB68-dcs</i>              | hypothetical protein from SCCmec elements          | hp_Q9XB68_611                                     | AB033763.2[38065:38093:r]                                                       | AB033763.2[38014:38037]                                                               |
| 34. | <b><i>dfrA</i></b>       | -         | -                              | dihydrofolate reductase type 1                     | dfrA_12<br>2,1-dfrA                               | AE017171.1 [2588:2614:r]<br>AB049452.1 [2076:2103]                              | AE017171.1[2494:2513:r]                                                               |
| 35. | <b><i>ebh</i></b>        | -         | -                              | cell wall associated fibronectin-binding protein   | hp_ebh-3prime_611                                 | AJ938182.1[1406914:1406940:r]                                                   | AJ938182.1[1405560:1405579]                                                           |
| 36. | <b><i>ebpS</i></b>       | -         | <i>ebpS</i>                    | cell surface elastin binding protein               | hp_ebpS_614,<br>hp_ebpS_612,<br>hp_ebpS_613       | AF400161.1[975:999],<br>AF400161.1[273:300],<br>AF400161.1[511:536]             | AF400161.1[1013:1030:r],<br>AF400161.1[546:569:r],<br>AF400161.1[303:321:r]           |
|     |                          |           | <i>ebpS-01-1111</i> (aus CC45) |                                                    | hp_ebpS_614,<br>hp_ebpS_611                       | AF400161.1[975:999],<br>AM075954.1[148:172]                                     | AF400161.1[1013:1030:r],<br>AF400161.1[303:321:r]                                     |
| 37. | <b><i>edinA</i></b>      | -         | -                              | epidermal cell differentiation inhibitor precursor | edinA_11                                          | M63917.1[460:489]                                                               | M63917.1[502:520:r]                                                                   |
| 38. | <b><i>edinB</i></b>      | -         | -                              | epidermal cell differentiation inhibitor B         | edinB_11                                          | AB057421.1[7445:7471]                                                           | AB057421.1[7482:7501:r]                                                               |
| 39. | <b><i>edinC</i></b>      | -         | -                              | epidermal cell differentiation inhibitor C         | edinC_11                                          | AP003088.1[1810:1839:r]                                                         | AP003088.1[1755:1776]                                                                 |
| 40. | <b><i>eno</i></b>        | -         | -                              | enolase                                            | hp_eno_611                                        | AC074317.5[16708:16737:r]                                                       | AC074317.5[16665:16683]                                                               |

| Nr. | Symbol               | Synonymes          | Alleles             | Name / description of gene or gene product                               | probe                        | Probe sequence                                          | Primer sequence                                                             |
|-----|----------------------|--------------------|---------------------|--------------------------------------------------------------------------|------------------------------|---------------------------------------------------------|-----------------------------------------------------------------------------|
| 41. | <b><i>entX</i></b>   | SACOL1657          | -                   | hypothetical enterotoxin homologue                                       | entX_11                      | BA000017.4[1708858:1708886:r]                           | BA000017.4[1708835:1708855]                                                 |
| 42. | <b><i>erm(A)</i></b> | <b><i>ermA</i></b> | -                   | rRNA adenine N-6-methyltransferase, erythromycin/ clindamycin resistance | ermA_9,4                     | BA000017.4 [1762850:1762875]                            | BA000017.4[1762907:1762928]                                                 |
| 43. | <b><i>erm(B)</i></b> | <b><i>ermB</i></b> | -                   | erythromycin/clindamycin resistance                                      | hp_ermB_611<br>hp_ermB_612   | EF450709.1 [2405:2428]<br>EF450709.1 [2528:2557]        | EF450709.1 [2443:2464:r]<br>EF450709.1 [2564:2584:r]                        |
| 44. | <b><i>erm(C)</i></b> | <b><i>ermC</i></b> | -                   | erythromycin/clindamycin resistance                                      | ermC_8,1_PM4<br>ermC_8,2_PM4 | AE002098.2[75789:75813],<br>AE002098.2[75854:75878]     | AE002098.2[75909:75929:r]                                                   |
| 45. | <b><i>etA</i></b>    | -                  | -                   | exfoliative toxin serotype A                                             | 8,2-etA                      | AP001553.1[42317:42344]                                 | AP001553.1[42387:42406:r]                                                   |
| 46. | <b><i>etB</i></b>    | -                  | -                   | exfoliative toxin serotype B                                             | 9,3-etB                      | AP003088.1[5389:5416]                                   | AP003088.1[5438:5460:r]                                                     |
| 47. | <b><i>etD</i></b>    | -                  | -                   | exfoliative toxin D                                                      | etD_11                       | AB057421.1[5648:5677]                                   | AB057421.1[5694:5715:r]                                                     |
| 48. | <b><i>far1</i></b>   | <b><i>fusB</i></b> | -                   | fusidic acid resistance (plasmid-borne)                                  | far1_10                      | AY047358.1 [1787:1814]                                  | AY047358.1[1818:1838:r]                                                     |
| 49. | <b><i>fexA</i></b>   | -                  | -                   | chloramphenicol/florfenicol exporter                                     | hp_fexA_611                  | AJ549214.1[332:357]                                     | AJ549214.1[364:382:r]                                                       |
| 50. | <b><i>fib</i></b>    | -                  | -                   | fibrinogen binding protein (19 kDa)                                      | hp_fib_611,<br>hp_fib_612    | AJ306909.1[483:507],<br>BX571856.1[1178081:1178105]     | AJ306909.1[511:528:r]                                                       |
| 51. | <b><i>fnbA</i></b>   | -                  | <i>fnbA-COL</i>     | fibronectin-binding protein A                                            | hp_fnbA_615,<br>hp_fnbA_612  | AJ629121.1[1767:1795],<br>AJ629121.1[983:1009]          | AJ629121.1[1823:1843:r],<br>AJ629121.1[1031:1052:r]                         |
|     |                      |                    | <i>fnbA-MRSA252</i> |                                                                          | hp_fnbA_615,<br>hp_fnbA_613  | AJ629121.1[1767:1795],<br>AM076028.1[1027:1055]         | AM076028.1[1061:1079:r],<br>AJ629121.1[1823:1843:r]                         |
|     |                      |                    | <i>fnbA-MW2</i>     |                                                                          | hp_fnbA_615,<br>hp_fnbA_611  | AJ629121.1[1767:1795],<br>AM075994.1[630:657]           | AM075994.1[672:693:r],<br>AJ629121.1[1823:1843:r]                           |
|     |                      |                    | <i>fnbA-RF122</i>   |                                                                          | hp_fnbA_615,<br>hp_fnbA_614  | AJ629121.1[1767:1795],<br>AJ938182.1[2510055:2510084:r] | AJ629121.1[1823:1843:r],<br>AJ938182.1[2510030:2510048]                     |
|     |                      |                    | <i>fnbA-ST80</i>    |                                                                          | hp_fnbA_615                  | AJ629121.1[1767:1795]                                   | AJ629121.1[1823:1843:r]                                                     |
| 52. | <b><i>fnbB</i></b>   | -                  | <i>fnbB-COL</i>     | fibronectin-binding protein B                                            | hp_fnbB_614,<br>hp_fnbB_616  | AJ629122.1[991:1017],<br>AJ629122.1[1658:1688]          | AJ629122.1[1041:1061:r],<br>AJ629122.1[1697:1714:r]                         |
|     |                      |                    | <i>fnbB-MW2</i>     |                                                                          | hp_fnbB_613,<br>hp_fnbB_616  | AM076068.1[854:883],<br>AJ629122.1[1658:1688]           | AM076068.1[893:912:r]                                                       |
|     |                      |                    | <i>fnbB-Mu50</i>    |                                                                          | hp_fnbB_611,<br>hp_fnbB_616  | AM076047.1[866:895],<br>AJ629122.1[1658:1688]           | AM076047.1[795:817:r],<br>AJ629122.1[1697:1714:r],<br>AM076047.1[914:934:r] |
|     |                      |                    | <i>fnbB-ST15</i>    |                                                                          | hp_fnbB_611,<br>hp_fnbB_612  | AM076047.1[866:895],<br>AM076087.1[758:783]             | AM076057.1[920:940:r],<br>AM076047.1[795:817:r]                             |
|     |                      |                    | <i>fnbB-ST36</i>    |                                                                          | hp_fnbB_611                  | AM076047.1[866:895]                                     | AM076047.1[795:817:r],<br>AM076079.1[914:933:r]                             |
|     |                      |                    | <i>fnbB-ST45-2</i>  |                                                                          | hp_fnbB_615                  | AM076078.1[866:893]                                     | AM076047.1[795:817:r],<br>AM076078.1[900:920:r]                             |
| 53. | <b><i>fosB</i></b>   | -                  | <i>fosB</i>         | metallothiol transferase                                                 | hp_fosB_611                  | AP009324.1[2460791:2460821]                             | AP009324.1[2460852:2460871:r]                                               |
|     |                      |                    | <i>fosB-plasmid</i> |                                                                          | hp_fosB_612                  | AP006717.1[448:478]                                     | AP006717.1[508:527:r]                                                       |
| 54. | <b><i>fusC</i></b>   | <b>Q6GD50</b>      | -                   | SCC-encoded protein associated with fusidic acid resistance              | hp_Q6GD50_611                | AF411935.1[423:452:r]                                   | AF411935.1[372:390]                                                         |
| 55. | <b><i>gapA</i></b>   | -                  | -                   | glyceraldehyde 3-phosphate dehydrogenase, locus 1                        | hp_gapA-118704_PM5           | AC074317.5[21403:21431:r]                               | AC074317.5[21373:21393]                                                     |
| 56. | <b><i>hla</i></b>    | -                  | -                   | haemolysin alpha                                                         | hla_11                       | AC027137.8[47755:47784]                                 | AC027137.8[47798:47820:r]                                                   |

| Nr. | Symbol         | Synonymes             | Alleles                                         | Name / description of gene or gene product                            | probe                                                         | Probe sequence                                                                                                                             | Primer sequence                                                                          |
|-----|----------------|-----------------------|-------------------------------------------------|-----------------------------------------------------------------------|---------------------------------------------------------------|--------------------------------------------------------------------------------------------------------------------------------------------|------------------------------------------------------------------------------------------|
| 57. | <b>hlb</b>     | -                     | -                                               | haemolysin beta                                                       | hp_hlb_611,<br>hp_hlb_612,<br>hp_hlb_613,<br>hlb_11<br>hlb_12 | CP000046.1 [2063898:2063922],<br>BA000017.4 [2126171:2126196],<br>S72497.1[366:390],<br>CP000046.1 [2063880:2063906],<br>S72497.1[347:374] | CP000046.1[2063925:2063944:r]                                                            |
| 58. | <b>hld</b>     | -                     | -                                               | haemolysin delta                                                      | hld_11                                                        | AB043554.1[196:220:r]                                                                                                                      | AB043554.1[153:175]                                                                      |
| 59. | <b>hlgA</b>    | -                     | -                                               | haemolysin gamma, component A                                         | hlgA_11                                                       | BA000017.4 [2549687:2549713]                                                                                                               | BA000017.4[2549714:2549735:r]                                                            |
| 60. | <b>hIII</b>    | SAV2170,<br>SACOL2160 | <i>hIII- other than RF122</i>                   | putative membrane protein                                             | hl-III_11                                                     | AB078343.1[539:567]                                                                                                                        | AB078343.1[998:1019:r]                                                                   |
|     |                |                       | <i>hIII-consensus</i>                           |                                                                       | hp_hIII_611                                                   | AB078343.1[951:976]                                                                                                                        | AB078343.1[590:612:r]                                                                    |
| 61. | <b>hsdS1</b>   | -                     | <i>hsdS1-RF122</i>                              | type I site-specific deoxyribonuclease subunit, 1 <sup>st</sup> locus | hp_hsdS-RF122-1_611                                           | AJ938182.1[317663:317689]                                                                                                                  | AJ938182.1[317702:317723:r]                                                              |
| 62. | <b>hsdS2</b>   | -                     | <i>hsdS2-ST5+ST8</i>                            | type I site-specific deoxyribonuclease subunit, 2nd locus             | hp_hsdS-COL-1_611                                             | AP009324.1[478662:478690]                                                                                                                  | AP009324.1[478701:478719:r]                                                              |
|     |                |                       | <i>hsdS2-MW2+476</i>                            |                                                                       | hp_hsdS-MW2-1_611                                             | BA000033.2[442980:443006]                                                                                                                  | BA000033.2[443035:443058:r],<br>AJ938182.1[1812895:1812912]                              |
|     |                |                       | <i>hsdS2-RF122</i>                              |                                                                       | hp_hsdS-RF122-2_611                                           | AJ938182.1[422326:422351]                                                                                                                  | AJ938182.1[422376:422398:r]                                                              |
|     |                |                       | <i>hsdS2-MRSA252</i>                            |                                                                       | hp_hsdS-MRSA252-1_611                                         | BX571856.1[463045:463073]                                                                                                                  | BX571856.1[463099:463120:r]                                                              |
| 63. | <b>hsdS3</b>   | -                     | <i>hsdS3-AllOtherThanRF122+252</i>              | type I site-specific deoxyribonuclease subunit, 3rd locus             | hp_hsdS-CC25_611                                              | DQ309452.1[57:85]                                                                                                                          | AJ938182.1[1812895:1812912]                                                              |
|     |                |                       | <i>hsdS3-ST8+ST1+RF122</i>                      |                                                                       | hp_hsdS-COL-2_611                                             | AJ938182.1[1811960:1811988:r]                                                                                                              | AJ938182.1[1812895:1812912]                                                              |
|     |                |                       | <i>hsdS3-Mu50+N315</i>                          |                                                                       | hp_hsdS-Mu50-2_611                                            | AP009324.1[1937287:1937313:r]                                                                                                              | AP009324.1[1937243:1937264]                                                              |
|     |                |                       | <i>hsdS3-CC51+252</i>                           |                                                                       | hp_hsdS-CC51_611                                              | BX571856.1[1983689:1983715:r]                                                                                                              | BX571856.1[1983667:1983686]                                                              |
|     |                |                       | <i>hsdS3-MRSA252</i>                            |                                                                       | hp_hsdS-MRSA252-2_611                                         | BX571856.1[1983034:1983063:r]                                                                                                              | BX571856.1[1983667:1983686]                                                              |
| 64. | <b>hsdSx</b>   | -                     | <i>hsdSx-CC25</i>                               | type I site-specific deoxyribonuclease subunit, unknown locus         | hp_hsdS-CC25_612                                              | AP009324.1[1938268:1938295:r]                                                                                                              | AJ938182.1[1811926:1811943]                                                              |
|     |                |                       | <i>hsdSx-CC15</i>                               |                                                                       | hp_hsdS-CC15_611                                              | DQ309450.1[976:1000]                                                                                                                       | DQ309450.1[1009:1031:r]                                                                  |
|     |                |                       | <i>hsdSx-etd</i>                                |                                                                       | hp_hsdS-etd_611                                               | AB057421.1[2572:2598:r]                                                                                                                    | AB057421.1[2543:2565]                                                                    |
| 65. | <b>hysA1/2</b> | -                     | <i>hysA1-MRSA252</i>                            | hyaluronate lyase, first / second locus                               | hp_hysA_613                                                   | BX571856.1[1975471:1975495]                                                                                                                | AC078831.10[18640:18660:r],<br>AJ938182.1[1803841:1803863:r]                             |
|     |                |                       | <i>hysA1-MRSA252+RF122 and hysA2-all</i>        |                                                                       | hp_hysA_614                                                   | AC078831.10[18606:18636]                                                                                                                   |                                                                                          |
|     |                |                       | <i>hysA1-MRSA252+RF122 and hysA2-COL+USA300</i> |                                                                       | hp_hysA_615                                                   | AJ938182.1[1803808:1803836]                                                                                                                |                                                                                          |
| 66. | <b>hysA2</b>   | -                     | <i>hysA2-AllOtherThan252</i>                    | hyaluronate lyase, second locus                                       | hp_hysA_611                                                   | AC078831.10[17303:17329]                                                                                                                   | AC078831.10[17230:17253:r],<br>AC078831.10[17343:17361:r],<br>AC078831.10[18640:18660:r] |
|     |                |                       | <i>hysA2-COL+USA300+NCTC</i>                    |                                                                       | hp_hysA_617                                                   | AC078831.10[17198:17228]                                                                                                                   |                                                                                          |
|     |                |                       | <i>hysA2-AllOtherThanCOL+USA300+NCTC</i>        |                                                                       | hp_hysA_616                                                   | AJ938182.1[2230577:2230606]                                                                                                                |                                                                                          |
|     |                |                       | <i>hysA2-OtherThanCOL+USA300+NCTC</i>           |                                                                       | hp_hysA_618                                                   | AP009324.1[2345045:2345075]                                                                                                                |                                                                                          |
|     |                |                       | <i>hysA2-MRSA252</i>                            |                                                                       | hp_hysA_612                                                   | AY442448.1[26:54],                                                                                                                         |                                                                                          |
| 67. | <b>icaA</b>    | -                     | -                                               | intercellular adhesion protein A                                      | hp_icaA_611                                                   | AF086783.1[3376:3401]                                                                                                                      | AF086783.1[3422:3442:r]                                                                  |
| 68. | <b>icaC</b>    | -                     | -                                               | intercellular adhesion protein C                                      | hp_icaC_611                                                   | AF086783.1[5365:5394]                                                                                                                      | AF086783.1[5402:5420:r]                                                                  |
| 69. | <b>icaD</b>    | -                     | -                                               | biofilm PIA synthesis protein D                                       | hp_icaD_611                                                   | AF086783.1[3681:3710]                                                                                                                      | AF086783.1[3738:3760:r]                                                                  |

| Nr. | Symbol           | Synonymes                     | Alleles             | Name / description of gene or gene product                                                                 | probe                                       | Probe sequence                                                                 | Primer sequence                                                                   |
|-----|------------------|-------------------------------|---------------------|------------------------------------------------------------------------------------------------------------|---------------------------------------------|--------------------------------------------------------------------------------|-----------------------------------------------------------------------------------|
| 70. | <b>isaB</b>      |                               | <i>isaB</i>         | immunodominant antigen B                                                                                   | hp_isaB_611                                 | AC027136.7[30242:30266:r]                                                      | AC027136.7[30213:30231]                                                           |
|     |                  |                               | <i>isaB-MRSA252</i> |                                                                                                            | hp_isaB_612                                 | BX571856.1[2813801:2813828:r]                                                  | BX571856.1[2813775:2813793]                                                       |
| 71. | <b>isdA</b>      | -                             | <i>isdA</i>         | transferrin-binding protein                                                                                | hp_isdA_611,<br>hp_isdA_612,<br>hp_isdA_614 | AB042826.1[872:896],<br>AB042826.1[991:1015],<br>AJ938182.1[1075980:1076008:r] | AB042826.1[1037:1059:r],<br>AB042826.1[901:919:r],<br>AJ938182.1[1075946:1075968] |
|     |                  |                               | <i>isdA-MRSA252</i> |                                                                                                            | hp_isdA_611,<br>hp_isdA_612                 | AB042826.1[872:896],<br>AB042826.1[991:1015]                                   | AB042826.1[1037:1059:r],<br>AB042826.1[901:919:r]                                 |
| 72. | <b>kata</b>      | -                             | -                   | katalase A                                                                                                 | katA_11                                     | BA000017.4 [1409422:1409446]                                                   | BA000017.4[1409453:1409473:r]                                                     |
| 73. | <b>kdpA</b>      | -                             | <i>kdpA-SCC</i>     | potassium-translocating ATPase A, chain 2                                                                  | hp_kdpA-SCC_612,<br>hp_kdpA-SCC_611         | AB033232.1[25:53],<br>AP006716.1[38978:39004]                                  | AB033232.1[63:83:r],<br>AP006716.1[39037:39057:r]                                 |
| 74. | <b>kdpB</b>      | -                             | <i>kdpB-SCC</i>     | potassium-transporting ATPase B, chain 1                                                                   | hp_kdpB-SCC_611                             | AB033232.1[1908:1935]                                                          | AB033232.1[1948:1967:r]                                                           |
| 75. | <b>kdpC</b>      | -                             | <i>kdpC-SCC</i>     | potassium-translocating ATPase C, chain 2                                                                  | hp_kdpC-SCC_611,<br>hp_kdpC-SCC_612         | AB033232.1[3099:3125],<br>AB033232.1[3206:3232:r]                              | AB033232.1[3133:3151:r],<br>AB033232.1[3182:3202]                                 |
| 76. | <b>kdpD</b>      | -                             | <i>kdpD-SCC</i>     | sensor kinase protein                                                                                      | hp_kdpD-SCC_611                             | AP006716.1[37752:37779:r]                                                      | AP006716.1[37713:37731]                                                           |
| 77. | <b>kdpE</b>      | -                             | <i>kdpE-SCC</i>     | KDP operon transcriptional regulatory protein                                                              | hp_kdpE-SCC_611                             | AP006716.1[35126:35151:r]                                                      | AP006716.1[35099:35117]                                                           |
| 78. | <b>linA</b>      | -                             | -                   | lincosamid-nucleotidyltransferase                                                                          | linA_19,2<br>linA_19,3                      | AM184101.1[2144:2168:r],<br>AM184101.1[2216:2240:r]                            | AM184101.1[2037:2057],<br>AM184101.1[2053:2070]                                   |
| 79. | <b>lmrP</b>      | -                             | -                   | hypothetical protein, similar to integral membrane protein LmrP                                            | hp_lmrP_613,<br>hp_lmrP_611                 | AC069081.4[27540:27566],<br>AC069081.4[26853:26878]                            | AC069081.4[26886:26903:r],<br>AC069081.4[27570:27590:r]                           |
|     |                  |                               | <i>lmrP-RF122</i>   |                                                                                                            | hp_lmrP_612,<br>hp_lmrP_614                 | AJ938182.1[140620:140646],<br>AJ938182.1[141308:141333]                        | AJ938182.1[140655:140672:r],<br>AJ938182.1[141338:141358:r]                       |
| 80. | <b>lukD</b>      | -                             | -                   | leukocidin D component                                                                                     | lukD_11                                     | AB055623.1[2367:2396]                                                          | AB055623.1[2421:2441:r]                                                           |
| 81. | <b>lukE</b>      | -                             | -                   | leukocidin E component                                                                                     | lukE_11                                     | AB055623.1[1159:1183]                                                          | AB055623.1[1207:1226:r]                                                           |
| 82. | <b>lukF-hlg</b>  | -                             | -                   | haemolysin gamma, component B                                                                              | lukF-10                                     | BA000017.4[2552175:2552200]                                                    | BA000017.4[2552204:2552221:r]                                                     |
| 83. | <b>lukF-PV</b>   | -                             | -                   | Panton Valentine leukocidin F component                                                                    | lukF-PV_10                                  | AB006796.1[2256:2284]                                                          | AB006796.1[2295:2316:r]                                                           |
| 84. | <b>lukF-PV83</b> | -                             | -                   | F component from hypothetical leukocidin from ruminants                                                    | lukF-PV-P83_11                              | AB044554.1[42010:42037]                                                        | AB044554.1[42053:42070:r]                                                         |
| 85. | <b>lukM</b>      | -                             | -                   | S component from hypothetical leukocidin from ruminants                                                    | lukM_11                                     | AB044554.1[40866:40893]                                                        | AB044554.1[40914:40932:r]                                                         |
| 86. | <b>lukS-hlg</b>  | -                             | <i>lukS</i>         | haemolysin gamma, component C                                                                              | lukS_10                                     | BA000017.4 [2551185:2551209]                                                   | BA000017.4[2551213:2551233:r]                                                     |
|     |                  |                               | <i>lukS-ST45</i>    |                                                                                                            | hp_lukS-ST45_611                            | EF672356.1[663:686]                                                            | EF672356.1[690:710:r]<br>EF672356.1[690:711:r]                                    |
| 87. | <b>lukS-PV</b>   | -                             | -                   | Panton Valentine leukocidin S component                                                                    | lukS-PV_20                                  | AB006796.1[1628:1656]                                                          | AB006796.1[1679:1699:r]                                                           |
| 88. | <b>“lukX”</b>    | SAV2004,<br><i>lukG, lukA</i> | -                   | leukocidin/haemolysin toxin family protein                                                                 | lukX_11                                     | BA000017.4[2127329:2127353:r]                                                  | BA000017.4[2127284:2127306]                                                       |
| 89. | <b>“lukY”</b>    | SAV2005,<br><i>lukH, lukB</i> | <i>lukY</i>         | leukocidin/haemolysin toxin family protein                                                                 | lukY-var1_11                                | BA000017.4[2129068:2129097:r]                                                  | BA000017.4[2129030:2129050]                                                       |
|     |                  |                               | <i>lukY-MRSA252</i> |                                                                                                            | lukY-var2_11                                | BX571856.1[2171414:2171443:r]                                                  |                                                                                   |
| 90. | <b>map</b>       | <i>eap</i>                    | <i>map-7</i>        | Major histocompatibility complex class II analogue protein (=Extracellular adherence protein, <i>eap</i> ) | hp_map_613                                  | AJ132841.1[368:395]                                                            | AJ132841.1[420:438:r],<br>AJ223806.1[279:298:r]                                   |
|     |                  |                               | <i>map-COL</i>      |                                                                                                            | hp_map_611                                  | AJ223806.1[226:254]                                                            |                                                                                   |
|     |                  |                               | <i>map-IPOP2</i>    |                                                                                                            | hp_map_612                                  | AJ245439.1[361:385]                                                            |                                                                                   |

| Nr.  | Symbol          | Synonymes                      | Alleles            | Name / description of gene or gene product                                  | probe                             | Probe sequence                                                   | Primer sequence                                                                          |
|------|-----------------|--------------------------------|--------------------|-----------------------------------------------------------------------------|-----------------------------------|------------------------------------------------------------------|------------------------------------------------------------------------------------------|
| 91.  | <i>mecA</i>     | -                              | -                  | Modified penicillin binding protein 2, beta-lactam resistance defining MRSA | mecA_1,4<br>mecA_11               | CP000046.1 [39915:39942:r],<br>CP000046.1 [40041:40068:r]        | CP000046.1 [39857:39876:r],<br>CP000046.1 [40007:40025]                                  |
| 92.  | <i>mecC</i>     |                                |                    | Alternative <i>mec</i> gene from SCC <i>mec</i> XI                          | 17_mecA_hp<br>25_mecA_hp          | FR823292.1 [3006:3032:r]<br>FR823292.1 [2830:2862:r]             | FR823292.1 [2968:2988:r]<br>FR823292.1 [2764:2788:r]                                     |
| 93.  | <i>mecI</i>     | -                              | -                  | methicillin-resistance regulatory protein                                   | hp_mecI_611                       | AB037671.1 [22423:22452:r]                                       | AB037671.1 [22395:22416]                                                                 |
| 94.  | <i>mecR1</i>    | <i>mecR</i>                    | -                  | signal transducer protein MecR1                                             | hp_mecR_611,<br>hp_mecR_612       | AB033763.2 [31157:31186:r],<br>AB037671.1 [22874:22900:r]        | AB033763.2 [31133:31154],<br>AB037671.1 [22840:22859]                                    |
| 95.  | <i>mefA</i>     | -                              | -                  | macrolide efflux protein A                                                  | hp_mefA_611,<br>hp_mefA_612       | AB011259.1 [536:563],<br>AB011259.1 [1045:1072]                  | AB011259.1 [570:588:r],<br>AB011259.1 [1078:1099:r]                                      |
| 96.  | <i>merA</i>     | -                              | -                  | mercury-reductase                                                           | hp_merA_611                       | AB037671.1 [39354:39382:r]                                       | AB037671.1 [39315:39334]                                                                 |
| 97.  | <i>merB</i>     | -                              | -                  | mercuric resistance operon regulatory protein                               | hp_merB_611                       | AB037671.1 [38021:38046:r]                                       | AB037671.1 [38000:38018]                                                                 |
| 98.  | <i>mph</i> (BM) | <i>mpbBM</i> ,<br><i>mphBM</i> | -                  | probable lysylphosphatidylglycerol synthetase                               | hp_mpbBM_611,<br>hp_mpbBM_612     | AB013298.1 [2664:2693],<br>AB013298.1 [2896:2924]                | AB013298.1 [2700:2720:r],<br>AB013298.1 [2929:2947:r]                                    |
| 99.  | <i>mprF</i>     | -                              | -                  | energy-dependent efflux of erythromycin                                     | hp_mprF_612,<br>hp_mprF_611       | AP009324.1 [1443571:1443601],<br>AB043507.1 [2677:2707]          | AB043507.1 [2708:2731:r]                                                                 |
| 100. | <i>msr</i> (A)  | <i>msrA</i>                    | -                  | mercuric resistance operon regulatory protein                               | msrA_15,3                         | AB013298.1 [1525:1552]                                           | AB013298.1 [1614:1635:r]                                                                 |
| 101. | <i>mupR</i>     | <i>mupA</i>                    | -                  | mupirocin resistance protein                                                | mupR_13,2                         | X75439.1 [1504:1531]                                             | X75439.1 [1623:1642:r]                                                                   |
| 102. | <i>nuc1</i>     | -                              | -                  | thermostable extracellular nuclease                                         | hp_nuc1_611                       | AJ938182.1 [825403:825429]                                       | AJ938182.1 [825445:825462:r]                                                             |
| 103. | <i>ORF CM14</i> | SAB0026                        | -                  | enterotoxin-like protein ORF CM14                                           | hp_entCM14_611,<br>hp_entCM14_612 | AJ938182.1 [37154:37182],<br>AJ938182.1 [37532:37557]            | AJ938182.1 [37591:37610:r],<br>AJ938182.1 [37203:37221:r]                                |
| 104. | <i>pls-SCC</i>  | -                              | -                  | plasmin-sensitive surface protein                                           | hp_plsSCC_611                     | AB033763.2 [15685:15709:r]                                       | AB033763.2 [15641:15661]                                                                 |
| 105. | <i>Q2FXC0</i>   | -                              | -                  | hypothetical protein, located next to serine protease operon                | hp_Q2FXC0_611                     | AP009351.1 [1905375:1905400]                                     | AP009351.1 [1905410:1905429:r]                                                           |
| 106. | <i>Q2YUB3</i>   | -                              | -                  | unspecific efflux/transporter                                               | hp_Q2YUB3_611                     | AJ938182.1 [2026944:2026969:r]                                   | AJ938182.1 [2026920:2026937]                                                             |
| 107. | <i>Q7A4X2</i>   | -                              | -                  | hypothetical protein                                                        | hp_Q7A4X2_611                     | AJ938182.1 [1837306:1837335]                                     | AJ938182.1 [1837354:1837376:r]                                                           |
| 108. | <i>qacA</i>     | -                              | -                  | quaternary ammonium compound resistance protein A                           | hp_qacA_611                       | AB255366.1 [19119:19147]                                         | AB255366.1 [20504:20526:r],<br>AB255366.1 [20475:20498:r],<br>AB255366.1 [19153:19173:r] |
| 109. | <i>qacC</i>     | -                              | <i>qacC</i>        | quaternary ammonium compound resistance protein C                           | hp_qacC_611                       | AB125342.1 [2382:2411]                                           | AB125342.1 [2431:2450:r]                                                                 |
|      |                 |                                | <i>qacC-SA5</i>    |                                                                             | hp_qacC_613                       | U81980.1 [2017:2043]                                             | U81980.1 [2065:2086:r]                                                                   |
|      |                 |                                | <i>qacC-ST94</i>   |                                                                             | hp_qacC_615                       | Y16944.1 [1622:1649]                                             | Y16944.1 [1692:1714:r]                                                                   |
|      |                 |                                | <i>qacC-Ssap</i>   |                                                                             | hp_qacC_612                       | Y16945.1 [1951:1981]                                             | AE016833.1 [8848:8869:r]                                                                 |
|      |                 |                                | <i>qacC-equine</i> |                                                                             | hp_qacC_614                       | AJ512814.1 [1518:1545]                                           | AJ512814.1 [1567:1590:r]                                                                 |
| 110. | <i>rrn STAU</i> | -                              | -                  | Ribosomal sequence from <i>S. aureus</i> (genus-specific positive control)  | s_aur_rrn_1_pm_PM4                | BA000017.4 [1999541:1999566:r]<br>BA000018.3 [1921746:1921771:r] | BA000017.4 [1999503:1999521:r]<br>BA000018.3 [1921708:1921726:r]                         |
| 111. | <i>saeR</i>     | -                              | -                  | response regulator, sae locus                                               | hp_saeR_611                       | AF129010.1 [251:280]                                             | AF129010.1 [296:316:r]                                                                   |
| 112. | <i>saeS</i>     | -                              | -                  | histidine protein kinase, sae locus                                         | hp_saeS_611,<br>hp_saeS_612       | AF129010.1 [1229:1257],<br>AF129010.1 [1729:1758]                | AF129010.1 [1283:1304:r],<br>AF129010.1 [1770:1791:r]                                    |
| 113. | <i>sak</i>      | -                              | -                  | staphylokinase                                                              | hp_sak_611,<br>sak_11             | BA000017.4 [2086572:2086601:r]<br>BA000017.4 [2086418:2086443:r] | BA000017.4 [2086553:2086571],<br>BA000017.4 [2086376:2086395]                            |
| 114. | <i>sarA</i>     | -                              | -                  | staphylococcal accessory regulator A                                        | hp_sarA_611,                      | CP000046.1 [700076:700102:r]                                     | CP000046.1 [700049:700066]                                                               |

| Nr.  | Symbol      | Synonymes        | Alleles                     | Name / description of gene or gene product                   | probe                                       | Probe sequence                                                                                    | Primer sequence                                                             |
|------|-------------|------------------|-----------------------------|--------------------------------------------------------------|---------------------------------------------|---------------------------------------------------------------------------------------------------|-----------------------------------------------------------------------------|
| 115. | <i>sasG</i> | -                | <i>sasG-COL</i>             | <i>Staphylococcus aureus</i> surface protein G               | hp_sasG_613,<br>hp_sasG_611                 | AP009324.1[2635299:2635327:r],<br>AP009324.1[2635746:2635773:r]                                   | AP009324.1[2635268:2635289],<br>AP009324.1[2635703:2635725]                 |
|      |             |                  | <i>sasG-MW2</i>             |                                                              | hp_sasG_612,<br>hp_sasG_611                 | BA000033.2[2573572:2573601:r],<br>AP009324.1[2635746:2635773:r]                                   | AP009324.1[2635703:2635725],<br>BA000033.2[2573526:2573543]                 |
| 116. | <i>sat</i>  | -                | -                           | streptothricin-acetyltransferase                             | sat-17,2<br>sat-17,3                        | U51474.1[393:421]<br>U51474.1[429:456]                                                            | U51474.1[488:505:r]                                                         |
| 117. | <i>sbi</i>  | -                | -                           | IgG-binding protein                                          | sbi-var1_11,<br>sbi-var1_12                 | CP000046.1 [2476904:2476929],<br>CP000046.1 [2477142:2477171]                                     | CP000046.1[2476963:2476982:r]<br>CP000046.1[2477188:2477210:r]              |
| 118. | <i>scn</i>  | -                |                             | Staphylococcal complement inhibitor (SCIN)                   | hp_scn_611                                  | AF424783.1[41412:41440]                                                                           | AF424783.1[41450:41470:r]                                                   |
| 119. | <i>sdrC</i> | -                | <i>sdrC-B1</i>              | Ser-Asp rich fibrinogen-/bone sialoprotein-binding protein C | hp_sdrC_612,<br>hp_sdrC_613                 | AM076155.1[1009:1036],<br>AJ005645.1[679:705]                                                     | AJ938182.1[574454:574471:r],<br>AM076155.1[1039:1061:r]                     |
|      |             |                  | <i>sdrC-COL</i>             |                                                              | hp_sdrC_611,<br>hp_sdrC_613<br>hp_sdrC_615, | AJ005645.1[280:308],<br>AJ005645.1[679:705]<br>AJ005645.1[1288:1314],                             | AJ005645.1[322:341:r],<br>AJ005645.1[726:744:r]<br>AJ005645.1[1337:1355:r], |
|      |             |                  | <i>sdrC-MRSA252</i>         |                                                              | hp_sdrC_616,<br>hp_sdrC_613                 | AJ938182.1[575014:575042],<br>AJ005645.1[679:705]                                                 | AJ938182.1[574454:574471:r]                                                 |
|      |             |                  | <i>sdrC-MW2</i>             |                                                              | hp_sdrC_616,<br>hp_sdrC_611,<br>hp_sdrC_613 | AJ938182.1[575014:575042],<br>AJ005645.1[280:308],<br>AJ005645.1[679:705]                         | AJ005645.1[322:341:r],<br>AJ005645.1[1337:1355:r],<br>AJ005645.1[726:744:r] |
|      |             |                  | <i>sdrC-Mu50</i>            |                                                              | hp_sdrC_614,<br>hp_sdrC_611,<br>hp_sdrC_613 | AM076143.1[1099:1125],<br>AJ005645.1[280:308],<br>AJ005645.1[679:705]                             | AJ005645.1[322:341:r],<br>AJ005645.1[1337:1355:r],<br>AJ005645.1[726:744:r] |
| 120. | <i>sdrD</i> | -                | <i>sdrD-COL</i>             | Ser-Asp rich fibrinogen-/bone sialoprotein-binding protein D | hp_sdrD_614,<br>hp_sdrD_612                 | AJ005646.1[1866:1893],<br>AJ005646.1[1207:1232]                                                   | AJ005646.1[1237:1258:r],<br>AJ005646.1[1903:1924:r]                         |
|      |             |                  | <i>sdrD-Mu50</i>            |                                                              | hp_sdrD_614,<br>hp_sdrD_613                 | AJ005646.1[1866:1893],<br>AM076196.1[158:186]                                                     | AJ005646.1[1903:1924:r],<br>AM076196.1[190:210:r]                           |
|      |             |                  | <i>sdrD-other1</i>          |                                                              | hp_sdrD_614,<br>hp_sdrD_611                 | AJ005646.1[1866:1893],<br>AM076206.1[157:186]                                                     | AJ005646.1[1903:1924:r],<br>AM076206.1[195:212:r]                           |
| 121. | <i>sdrM</i> | <i>tetEfflux</i> | -                           | transport-/efflux protein                                    | hp_tetEfflux_611                            | AB078343.1[1808:1834]                                                                             | AB078343.1[1849:1870:r]                                                     |
| 122. | <i>sea</i>  | <i>entA</i>      | <i>sea</i>                  | enterotoxin A                                                | entA_3,2,<br>entA_3,3<br>entA-var1_11       | BA000017.4 [2088572:2088598:r]<br>BA000017.4 [2088482:2088456],<br>BA000017.4 [2088512:2088536:r] | BA000017.4[2088473:2088492]                                                 |
|      |             |                  | <i>sea-320E (entA-320E)</i> | enterotoxin A, allele from strain 320E                       | entA-var2_11                                | AY196686.1[508:532]                                                                               |                                                                             |
|      |             | <i>entP, sep</i> | <i>sea-N315 (entP, sep)</i> | enterotoxin A, allele from strain N315 =enterotoxin P        | entA-var3_11                                | BA000018.3[2011518:2011545:r]                                                                     | BA000018.3[2011492:2011510]                                                 |
| 123. | <i>seb</i>  | <i>entB</i>      | -                           | enterotoxin B                                                | entB_11<br>entB_4,1                         | CP000046.1 [916903:916927]<br>CP000046.1 [916583:916609]                                          | CP000046.1[916957:916976:r]<br>CP000046.1[916642:916663:r]                  |
| 124. | <i>sec</i>  | <i>entC</i>      | -                           | enterotoxin C                                                | entC_5,2<br>entC_5,3                        | BA000017.4 [2134733:2134761:r]<br>BA000017.4 [2134652:2134680:r]                                  | BA000017.4[2134593:2134610:r]                                               |
| 125. | <i>sed</i>  | <i>entD</i>      | -                           | enterotoxin D                                                | entD_11                                     | AY518388.1[49:76]                                                                                 | AY518388.1[79:97:r]                                                         |
| 126. | <i>see</i>  | <i>entE</i>      | -                           | enterotoxin E                                                | entE_11                                     | M21319.1[601:624]                                                                                 | M21319.1[644:661:r]                                                         |
| 127. | <i>seg</i>  | <i>entG</i>      | -                           | enterotoxin G                                                | entG_11                                     | BA000017.4 [1954500:1954526:r]                                                                    | BA000017.4[1954468:1954486]                                                 |
| 128. | <i>seh</i>  | <i>entH</i>      | -                           | enterotoxin H                                                | entH_11                                     | AB060536.1 [139:164]                                                                              | AB060536.1[178:196:r]                                                       |
| 129. | <i>sei</i>  | <i>entI</i>      | -                           | enterotoxin I                                                | entG_11                                     | BA000017.4[1957319:1957343:r]                                                                     | BA000017.4[1957273:1957293]                                                 |
| 130. | <i>sej</i>  | <i>entJ</i>      | -                           | enterotoxin J                                                | entJ_11                                     | AB075606.1 [1849:1876:r]                                                                          | AB075606.1[1804:1823]                                                       |



| Nr.  | Symbol           | Synonymes          | Alleles                      | Name / description of gene or gene product                                  | probe                       | Probe sequence                                                                        | Primer sequence                                                                             |
|------|------------------|--------------------|------------------------------|-----------------------------------------------------------------------------|-----------------------------|---------------------------------------------------------------------------------------|---------------------------------------------------------------------------------------------|
| 131. | <i>sek</i>       | <i>entK</i>        | -                            | enterotoxin K                                                               | hp_entK_612,<br>hp_entK_611 | AF410775.1[14220:14250],<br>AF410775.1[13901:13932]                                   | AF410775.1[14306:14328:r],<br>AF410775.1[14268:14290:r],<br>AF410775.1[13951:13974:r]       |
| 132. | <i>sel</i>       | <i>entL</i>        | -                            | enterotoxin L                                                               | entL_11                     | AF217235.1[892:919]                                                                   | AF217235.1[930:950:r]                                                                       |
| 133. | <i>sem</i>       | <i>entM</i>        | -                            | enterotoxin M                                                               | entM_11                     | BA000017.4[1958262:1958291:r]                                                         | BA000017.4[1958242:1958260]]                                                                |
| 134. | <i>sen</i>       | <i>entN</i>        | <i>sen- other than RF122</i> | enterotoxin N                                                               | entN_11                     | BA000017.4[1955741:1955768:r]                                                         | BA000017.4[1955492:1955513]                                                                 |
|      |                  |                    | <i>sen-consensus</i>         |                                                                             | hp_entN_611                 | AF156894.1[1203:1230]                                                                 | AF156894.1[1458:1479:r]                                                                     |
| 135. | <i>seo</i>       | <i>entO</i>        | -                            | enterotoxin O                                                               | entO_11                     | BA000017.4[1958936:1958962:r]                                                         | BA000017.4[1958904:1958925]                                                                 |
| 136. | <i>seq</i>       | <i>entQ</i>        | -                            | enterotoxin Q                                                               | hp_entQ_611,<br>hp_entQ_612 | AF410775.1[13213:13242],<br>AF410775.1[13437:13467]                                   | AF410775.1[13267:13288:r],<br>AF410775.1[13404:13423:r],<br>AF410775.1[13551:13570:r]       |
| 137. | <i>ser</i>       | <i>entR</i>        | -                            | enterotoxin R                                                               | entR_11                     | AB075606.1 [750:775]                                                                  | AB075606.1[783:802:r]                                                                       |
| 138. | <i>“setB1”</i>   | -                  | <i>setB1</i>                 | staphylococcal exotoxin-like protein,<br>second locus                       | setB-SA1178_11              | CP000046.1 [1182940:1182967:r]                                                        | CP000046.1[1182916:1182934]                                                                 |
|      |                  |                    | <i>setB1-MRSA252</i>         |                                                                             | setB-SAR1139_11             | BX571856.1 [1185070:1185094:r]                                                        | BX571856.1[1185043:1185061]                                                                 |
| 139. | <i>“setB2”</i>   | -                  | <i>setB2</i>                 | staphylococcal exotoxin-like protein,<br>second locus                       | setB-SA1179_11              | CP000046.1 [1183750:1183777:r]                                                        | CP000046.1[1183717:1183736]                                                                 |
|      |                  |                    | <i>setB2-MRSA252</i>         |                                                                             | setB-SAR1140_11             | BX571856.1 [1185785:1185812:r]                                                        | BX571856.1[1185730:1185749]                                                                 |
| 140. | <i>“setB3”</i>   | -                  | <i>setB3</i>                 | staphylococcal exotoxin-like protein,<br>second locus                       | setB-SA1180_11              | CP000046.1 [1184568:1184596:r]                                                        | CP000046.1[1184540:1184558]                                                                 |
| 141. | <i>“setC”</i>    | <i>selX</i>        | -                            | staphylococcal enterotoxin-like toxin X                                     | setC-MW0345_11              | CP000046.1 [446394:446420]                                                            | CP000046.1[446441:446462:r]                                                                 |
| 142. | <i>seu / sey</i> |                    | -                            | Enterotoxin U and/or Y                                                      | hp_entU_611                 | AF156894.1[263:292],                                                                  | AF156894.1[318:338:r]                                                                       |
| 143. | <i>spa</i>       | -                  | -                            | Protein A                                                                   | proteinA_12                 | CP000046.1 [107407:107435:r]                                                          | CP000046.1[107900:107917]<br>CP000046.1[107378:107395]                                      |
| 144. | <i>splA</i>      | -                  | -                            | serin protease A                                                            | splA_11                     | CP000046.1 [1921021:1921046:r]                                                        | CP000046.1[1920987:1921005]                                                                 |
| 145. | <i>splB</i>      | -                  | -                            | serin protease B                                                            | splB_11                     | CP000046.1 [1920101:1920126:r]                                                        | CP000046.1[1920073:1920090]                                                                 |
| 146. | <i>splE</i>      | -                  | -                            | serin protease E                                                            | hp_splE_611                 | AF271715.1[4880:4903]                                                                 | AF271715.1[4921:4941:r]                                                                     |
| 147. | <i>ssl01</i>     | <i>set6, set16</i> | <i>ssl01-COL</i>             | staphylococcal superantigen-like protein 1:                                 | hp_set6_probe 1_11          | BA000017.4[467156:467183],<br>BA000018.3[441398:441425],<br>AC069311.6[16791:16818]   | BA000017.4[467190:467210:r],<br>BA000018.3[441432:441452:r],<br>AC069311.6[16825:16845:r]   |
|      |                  |                    |                              | set6-COL (SACOL468):<br>probe 1_11+probe 1_12                               | hp_set6_probe 1_12          | BA000017.4[467359:467382],<br>BA000018.3[441601:441624],<br>BX571856.1[453059:453082] | BA000017.4[467396:467414:r],<br>BA000018.3[441638:441656:r],<br>BA000033.2[429765:429783:r] |
|      |                  |                    |                              | set6-Mu50 (SAV0422):<br>probe 1_11+probe 4_11                               | hp_set6_probe 2_11          | BA000033.2[429525:429550],<br>BX571857.1[428186:428211],<br>BX571856.1[452856:452881] | BA000033.2[429559:429578:r],<br>BX571857.1[428220:428239:r],<br>BX571856.1[452890:452909:r] |
|      |                  |                    |                              | set6-MW2 (MW0382):<br>probe 2_11+probe 2_12                                 | hp_set6_probe 2_12          | BA000033.2[429731:429757],<br>BX571857.1[428392:428418]                               |                                                                                             |
|      |                  |                    |                              | SAR0422 (from strain MRSA 252):<br>probe 2_11+probe 1_12                    | hp_set6_probe 4_11          | AC069311.6[16994:17017],<br>CP000046.1[470856:470879]                                 |                                                                                             |
|      |                  |                    | <i>ssl01-RF122</i>           | staphylococcal superantigen-like protein 1 allele from strain RF122 (ST151) | hp_ssl01_611                | AJ938182.1[412226:412252],<br>AJ938182.1[412017:412045]                               | AC069311.6[17031:17049:r],<br>AJ938182.1[412058:412076:r]                                   |
| 148. | <i>ssl02</i>     | <i>set7, set17</i> | <i>ssl02</i>                 | staphylococcal superantigen-like                                            | set7-var1_11                | CP000046.1 [471582:471608]                                                            | CP000046.1[471646:471665:r]                                                                 |

| Nr.  | Symbol        | Synonymes           | Alleles              | Name / description of gene or gene product  | probe                                       | Probe sequence                                                                  | Primer sequence                                                                           |
|------|---------------|---------------------|----------------------|---------------------------------------------|---------------------------------------------|---------------------------------------------------------------------------------|-------------------------------------------------------------------------------------------|
|      |               |                     | <i>ssl02-MRSA252</i> | protein 2                                   | set7-var2_11                                | BX571856.1 [453788:453814]                                                      | CP000046.1[471646:471665:r]                                                               |
| 149. | <i>ssl03</i>  | <i>set8, set18</i>  | <i>ssl03</i>         | staphylococcal superantigen-like protein 3  | set8_11<br>hp_ssl03_611                     | CP000046.1 [472456:472481]<br>AJ938182.1[413800:413827]                         | CP000046.1[472502:472520:r]                                                               |
|      |               |                     | <i>ssl03-MRSA252</i> |                                             | set-SAR0424_11                              | BX571856.1 [454824:454850]                                                      |                                                                                           |
| 150. | <i>ssl04</i>  | <i>set9, set19</i>  | <i>ssl04-COL</i>     | staphylococcal superantigen-like protein 4  | set9-var1_11<br>set9-var1_12                | CP000046.1 [474254:474283]<br>CP000046.1 [474511:474537]                        | CP000046.1[474328:474349:r]<br>CP000046.1[474556:474575:r]                                |
|      |               |                     | <i>ssl04-MRSA252</i> |                                             | set-SAR0425_11<br>set-SAR0425_12            | BX571856.1 [456040:456064]<br>BX571856.1 [455386:455412]                        | BX571856.1[454869:454886:r]<br>BX571856.1[456703:456721:r]                                |
| 151. | <i>ssl05</i>  | <i>set3, set20</i>  | <i>ssl05</i>         | staphylococcal superantigen-like protein 5  | set3-var1_11<br>hp_ssl05_612                | BA000017.4 [470660:470688]<br>BA000017.4 [470300:470327]                        | BA000017.4[470703:470720:r]<br>BA000017.4[470338:470359:r]                                |
|      |               |                     | <i>ssl05-MRSA252</i> |                                             | set3-var2_11                                | BX571856.1 [457227:457253]                                                      | BX571856.1[457263:457284:r]                                                               |
|      |               |                     | <i>ssl05-RF122</i>   |                                             | hp_ssl05_611                                | AJ938182.1[415143:415170]                                                       | AJ938182.1[415181:415202:r]                                                               |
| 152. | <i>ssl06</i>  | <i>set21</i>        | <i>ssl06-MW2</i>     | staphylococcal superantigen-like protein 6  | set21_11<br>hp_ssl06_611                    | BA000033.2 [435210:435237]<br>BX571857.1 [433755:433784]                        | BA000033.2[435244:435264:r]<br>BA000033.2[435132:435153:r]<br>CP000253.1[394288:394308:r] |
| 153. | <i>ssl07</i>  | <i>set1, set22</i>  | <i>ssl07</i>         | staphylococcal superantigen-like protein 7  | set1-var4_11                                | BA000017.4 [471560:471589]                                                      | BA000017.4[471600:471617:r]                                                               |
|      |               |                     | <i>ssl07-FRI326</i>  |                                             | set1-var2_11                                | AF188836.1 [165:194]                                                            | BA000017.4[471600:471617:r]                                                               |
|      |               |                     | <i>ssl07-MRSA252</i> |                                             | set1-var1_11                                | BX571856.1 [458486:458515]                                                      | BA000017.4[471600:471617:r]                                                               |
| 154. | <i>ssl08</i>  | <i>set12, set23</i> | <i>ssl08</i>         | staphylococcal superantigen-like protein 8  | set12_11<br>hp_ssl08_611                    | BA000017.4 [472594:472621]<br>AJ938182.1 [417435:417464]                        | BA000017.4[472624:472644:r]<br>AJ938182.1[417465:417488:r]                                |
| 155. | <i>ssl09</i>  | <i>set5, set24</i>  | <i>ssl09</i>         | staphylococcal superantigen-like protein 9  | set5-var1_11<br>hp_ssl09_611                | CP000046.1 [475126:475152]<br>CP000046.1 [475125:475151]                        | CP000046.1[475171:475191:r]                                                               |
|      |               |                     | <i>ssl09-MRSA252</i> |                                             | set5-var2_11                                | BX571856.1 [459446:459472]                                                      | BX571856.1[459498:459519:r]                                                               |
| 156. | <i>ssl10</i>  | <i>set4, set25</i>  | <i>ssl10</i>         | staphylococcal superantigen-like protein 10 | set4-var1_11                                | CP000046.1 [476429:476457]                                                      | CP000046.1[476474:476491:r]                                                               |
|      |               |                     | <i>ssl10-RF122</i>   |                                             | hp_ssl10_611                                | AJ938182.1 [419736:419765]                                                      |                                                                                           |
|      |               |                     | <i>ssl10-MRSA252</i> |                                             | set4-var2_11                                | BX571856.1 [460746:460772]                                                      | BX571856.1[460783:460800:r]                                                               |
| 157. | <i>ssl11</i>  | <i>set2, set26</i>  | <i>ssl11-COL</i>     | staphylococcal superantigen-like protein 11 | set2-var4_11                                | CP000046.1 [480340:480368]                                                      | CP000046.1[480377:480395:r]                                                               |
|      |               |                     | <i>ssl11-MRSA252</i> |                                             | set2-var3_11                                | BA000017.4 [478916:478945]                                                      | BA000017.4[478947:478967:r]                                                               |
|      |               |                     | <i>ssl11-MW2</i>     |                                             | set2-var1_11                                | BA000033.2 [443788:443816]                                                      | BA000033.2[443857:443879:r]                                                               |
|      |               |                     | <i>ssl11-Mu50</i>    |                                             | set2-var2_11                                | BX571856.1 [464936:464964]                                                      | BX571856.1[464979:464999:r]                                                               |
| 158. | <i>sspA</i>   | -                   | <i>sspA-C66</i>      | glutamylendopeptidase                       | hp_sspA_613,<br>hp_sspA_611                 | AF309515.1[1298:1323],<br>AF309515.1[591:618]                                   | AF309515.1[632:650:r],<br>AF309515.1[1327:1347:r]                                         |
|      |               |                     | <i>sspA-MRSA252</i>  |                                             | hp_sspA_613,<br>hp_sspA_612,<br>hp_sspA_611 | AF309515.1[1298:1323],<br>BX571856.1[1064056:1064082:r],<br>AF309515.1[591:618] | AF309515.1[632:650:r],<br>AF309515.1[1327:1347:r]                                         |
|      |               |                     | <i>sspA-RF122</i>    |                                             | hp_sspA_611,<br>hp_sspA_614                 | AF309515.1[591:618],<br>AJ938182.1[991112:991137:r]                             | AF309515.1[632:650:r],<br>AF309515.1[1327:1347:r]                                         |
| 159. | <i>sspB</i>   | -                   | -                    | staphopain B, protease                      | hp_sspB_611,<br>hp_sspB_612                 | AF309515.1[1546:1571],<br>AF309515.1[2231:2260]                                 | AF309515.1[1583:1603:r],<br>AF309515.1[2264:2282:r]                                       |
| 160. | <i>sspP</i>   | -                   | -                    | staphopain A (staphylopain A), protease     | hp_sspP_612,<br>hp_sspP_611                 | AC090969.3[16450:16478],<br>AC090969.3[15944:15970]                             | AC090969.3[16483:16504:r],<br>AC090969.3[15980:15998:r]                                   |
| 161. | <i>tet(K)</i> | <i>tetK</i>         | -                    | tetracycline resistance                     | hp_tetK-59251_PM1,<br>hp_tetK-59250_PM1     | M16217.1 [1424:1452]<br>M16217.1 [1507:1535]                                    | M16217.1[1582:1604:r]                                                                     |
| 162. | <i>tet(M)</i> | <i>tetM</i>         | -                    | tetracycline resistance                     | tetM_11,3                                   | BA000017.4 [440374:440400:r]                                                    | BA000017.4[440340:440358]                                                                 |

| Nr.  | Symbol      | Synonymes    | Alleles                      | Name / description of gene or gene product                               | probe                | Probe sequence                                                  | Primer sequence                                            |
|------|-------------|--------------|------------------------------|--------------------------------------------------------------------------|----------------------|-----------------------------------------------------------------|------------------------------------------------------------|
| 163. | <i>tstI</i> | -            | <i>tstI_other than RF122</i> | toxic shock syndrome toxin 1                                             | tstI_16,2_PM4        | BA000017.4 [2137855:2137879]                                    | BA000017.4[2137910:2137930:r]                              |
|      |             |              | <i>tstI_consensus</i>        |                                                                          | hp_tst_611           | BA000017.4 [2138016:2138044]                                    | BA000017.4[2138051:2138070:r]                              |
| 164. | <i>ugpQ</i> | -            | -                            | glycerophosphoryl diester phosphodiesterase, associated with <i>mecA</i> | hp_ugpQ_611          | AB033763.2[34349:34374:r]                                       | AB033763.2[34320:34338]                                    |
| 165. | <i>vanA</i> | -            | -                            | vancomycin resistance gene                                               | 18,2-vanA            | AB247327.1[16135:16162]                                         | AB247327.1[16238:16257:r]                                  |
| 166. | <i>vanB</i> | -            | -                            | vancomycin resistance gene from enterococci and <i>Clostridium</i>       | 19,3-vanB<br>vanB_11 | AE016830.1[2213146:2213171:r],<br>AE016830.1[2213149:2213173:r] | AE016830.1[2213051:2213068]                                |
| 167. | <i>vanZ</i> | -            | -                            | teicoplanin resistance gene from enterococci                             | 20,3-vanZ            | AB247327.1[19318:19343]                                         | AB247327.1[19367:19386:r]                                  |
| 168. | <i>vatA</i> | -            | -                            | virginiamycin A acetyltransferase                                        | vatA_15,3            | AF117258.1[2296:2323:r]                                         | AF117258.1[2229:2247]                                      |
| 169. | <i>vatB</i> | -            | -                            | acetyltransferase inactivating streptogramin A                           | vatB_16,3            | U19459.1[543:570]                                               | U19459.1[659:680:r]                                        |
| 170. | <i>vga</i>  | -            | <i>vga</i>                   | ATP binding protein, streptogramin-A-resistance                          | vga_17,3             | AF117259.1[3729:3756]                                           | AF117259.1[3925:3944:r],<br>AF117259.1[3779:3799:r]        |
| 171. |             |              | <i>vga-BM 3327</i>           |                                                                          | vgaA_18,3            | AF186237.2[6470:6497]                                           | AF186237.2[6559:6578:r]                                    |
| 172. | <i>vgb</i>  | -            | -                            | virginiamycin B hydrolase                                                | vgb_19,2             | AF117258.1[3342:3369:r]                                         | AF117258.1[3261:3283]                                      |
| 173. | <i>vraS</i> | -            | -                            | sensor protein                                                           | hp_vraS_612          | AB035448.1[4748:4773]                                           | AB035448.1[4783:4802:r]                                    |
| 174. | <i>vwb</i>  | -            | <i>vwb (cons)</i>            | van Willebrand factor binding protein                                    | hp_vwb_615           | CP000046.1 [884859:884884]                                      | CP000046.1[883877:883899:r]                                |
|      |             | -            | <i>vwb (COL+MW2)</i>         |                                                                          | hp_vwb_612           | CP000046.1 [883836:883864]                                      | CP000046.1[884895:884914:r]                                |
|      |             |              | <i>vwb (MRSA252)</i>         |                                                                          | hp_vwb_613           | BX571856.1 [891899:891927]                                      | BX571856.1[891952:891972:r]                                |
|      |             | -            | <i>vwb (Mu50)</i>            |                                                                          | hp_vwb_614           | BA000017.4 [890919:890947]                                      | BA000017.4[890960:890980:r]<br>BA000017.4[891393:891412:r] |
|      |             | -            | <i>vwb (RF122)</i>           |                                                                          | hp_vwb_611           | AJ938182.1 [821019:821046]                                      | AJ938182.1[821064:821083:r]                                |
|      |             |              |                              |                                                                          |                      |                                                                 |                                                            |
| 175. | <i>xylR</i> | <i>mecR2</i> | -                            | homolog of xylose repressor, associated with SCC <i>mec</i> -elements    | hp_xylR_611          | AB037671.1[21440:21468:r]                                       | AB037671.1[21410:21429]                                    |
